# Supplementary material for: Single-cell genomics improves the discovery of risk variants and genes of atrial fibrillation
Source: Springer Nature journal article supplement (doi:10.1038/s41467-023-40505-5), 2023-08-17
Supplement: MOESM3 [file 41467_2023_40505_MOESM3_ESM.pdf › 41467_2023_40505_MOESM3_ESM.pdf]

### **Description of Additional Supplementary Files**

File Name: Supplementary Data 1

Description: Meta-data of the heart samples used in the study.

File Name: Supplementary Data 2

Description: TF enrichment in different cell types.

File Name: Supplementary Data 3

Description: Results of SNP fine-mapping analysis, and gene mapping.

File Name: Supplementary Data 4

Description: Comparing high PIP variants with variants with allele-specific activity using STARR-seq from van Ouwerkerk *et al.* 2020.

File Name: Supplementary Data 5

Description: Sum of PIPs for SNPs assigned to functional categories.

File Name: Supplementary Data 6

Description: SNPs chosen for experimental study.

File Name: Supplementary Data 7

Description: Colocalization result of fine-mapped SNPs with eQTLs.

File Name: Supplementary Data 8

Description: Gene mapping results, summarized at the gene level.

File Name: Supplementary Data 9

Description: Gene mapping results, summarized at the level of LD blocks.

File Name: Supplementary Data 10

Description: Information of genes at  $PIP \geq 0.8$  with literature evidence.

File Name: Supplementary Data 11

Description: Loci where the mapped high PIP ( $\geq 0.8$ ) genes are not the nearest genes.

File Name: Supplementary Data 12

Description: OMIM gene information.

File Name: Supplementary Data 13

Description: GO enrichment of genes with gene  $PIP \geq 0.8$ .

File Name: Supplementary Data 14

Description: GO enrichment of genes with gene  $PIP \geq 0.5$  (from STRING).

File Name: Supplementary Data 15

Description: High PIP eQTLs and their categories.
