# Supplementary material for: Single-cell genomics improves the discovery of risk variants and genes of atrial fibrillation
Source: Nat Commun. 2023 Aug 17;14:4999. doi: 10.1038/s41467-023-40505-5 (PMC10435551; doi:10.1038/s41467-023-40505-5)
Supplement: Supplementary file 4 — Supplementary Data 1-15 [file 41467_2023_40505_MOESM4_ESM.xlsx]

## Sheet: Summary
Supplementary Data	Caption
Supplementary Data 1	Meta-data of the heart samples used in the study.
Supplementary Data 2	TF enrichment in different cell types.
Supplementary Data 3	Results of SNP fine-mapping analysis, and gene mapping.
Supplementary Data 4	Comparing high PIP variants with variants with allele-specific activitiy using STARR-seq from van Ouwerkerk et al. 2020.
Supplementary Data 5	Sum of PIPs for SNPs assigned to functional categories.
Supplementary Data 6	SNPs chosen for experimental study.
Supplementary Data 7	Colocalization result of fine-mapped SNPs with eQTLs.
Supplementary Data 8	Gene mapping results, summarized at the gene level.
Supplementary Data 9	Gene mapping results, summarized at the level of LD blocks.
Supplementary Data 10	Information of genes at PIP >= 0.8 with literature evidence.
Supplementary Data 11	Loci where the mapped high PIP (>= 0.8) genes are not the nearest genes.
Supplementary Data 12	OMIM gene information.
Supplementary Data 13	GO enrichment of genes with gene PIP >= 0.8.
Supplementary Data 14	GO enrichment of genes with gene PIP >= 0.5 (from STRING).
Supplementary Data 15	High PIP eQTLs and their categories.

## Sheet: Supplementary Data 1
Supplementary Data 1. Meta-data of the heart samples used in the study.
The heart samples were obtained from the left and right ventricles (LV and RV), the interventricular septum, and the apex of three adult male donors.
"# Cells ATAC QC": number of cells in scATAC-seq retained after quality control (QC). "# Cells RNA QC": number of cells in snRNA-seq retained after QC.
Library name	Donor	Sex	Age	Region ID	Region Name	# Reads ATAC	# Cells ATAC QC	# Reads RNA	# Cells RNA QC
SP-HE-MW200804	Donor 1	Male	54	A	Interventricular septum	455820744	947	244321513	3044
SP-HE-MW200804	Donor 1	Male	54	C	Right ventricle	564058054	934	246059471	1506
SP-HE-MW200804	Donor 1	Male	54	D	Left ventricle	826669075	1539	246731609	2112
SP-HE-MW200804	Donor 1	Male	54	413	Apex	81155594	2326	93018120	3449
SP-HE-HE200915	Donor 2	Male	47	175	Interventricular septum	106131634	2013	240954861	5811
SP-HE-HE200915	Donor 2	Male	47	360	Right ventricle	419970825	2402	315397652	6964
SP-HE-HE200915	Donor 2	Male	47	397	Left ventricle	760000655	4873	319017681	7356
SP-HE-HE200915	Donor 2	Male	47	398	Apex	84434592	663	81869291	4727
SP-HE-MW200928E2	Donor 3	Male	55	175	Interventricular septum	112240789	3230	130763208	4854
SP-HE-MW200928E2	Donor 3	Male	55	367	Right ventricle	610897584	1438	220924109	2153
SP-HE-MW200928E2	Donor 3	Male	55	407	Left ventricle	582976863	3679	221516859	2412
SP-HE-MW200928E2	Donor 3	Male	55	408	Apex	77569681	2670	109083380	4971

## Sheet: Supplementary Data 2
Supplementary Data 2. TF enrichment in different cell types.
Each row shows the enrichment of one TF motifs in OCRs specific to one cell type.
Motif enrichment column shows the fold enrichment of motif occurrence in OCRs vs. chance expectation.
"Motif-gene score correlation": correlations between motif accessbility (from chromVar) of TFs with their accessibility-derived gene scores (from ArchR).
The rows are sorted by "neg.Log10-q", which are the -log10(q-values) from motif enrichment test.
TF	Cell type	Motif enrichment	neg. log10-q	Motif-gene score correlation
SPIB	Myeloid	2.96309	3747.27	0.458083
SPI1	Myeloid	2.13436	3382.17	0.0404511
SPIC	Myeloid	2.35968	1842.46	0.197033
BCL11A	Myeloid	1.90033	1622.95	-0.527369
BCL11B	Myeloid	1.90033	1622.95	0.0518031
ELF5	Myeloid	2.29807	899.901	0.0794225
EBF1	Pericyte	1.96346	618.298	0.66185
ELF2	Myeloid	1.65199	537.438	-0.458373
IRF1	Myeloid	1.40665	530.262	0.549229
CEBPA	Fibroblast	1.95688	490.755	0.728378
ETV6	Myeloid	1.93629	477.019	0.152659
STAT2	Myeloid	1.44041	438.224	0.407758
ETS2	Myeloid	1.61251	421.4	0.753989
CEBPB	Fibroblast	2.08551	414.333	0.266212
CEBPD	Fibroblast	1.92829	389.208	-0.0310132
MEF2B	Cardiomyocyte	1.47238	374.442	0.0398879
AC0021266	Cardiomyocyte	1.47238	374.442	NA
MEF2A	Cardiomyocyte	1.41032	364.424	0.579616
ELF1	Myeloid	1.8065	338.803	0.264329
RUNX1	Lymphoid	1.61163	312.589	0.192398
MEF2D	Cardiomyocyte	1.39323	312.027	0.790475
EHF	Myeloid	1.93624	291.369	-0.426807
RUNX2	Lymphoid	2.10426	290.066	0.304743
ENSG00000250096	Lymphoid	2.10426	290.066	NA
ELF3	Myeloid	1.91359	284.152	-0.760251
FOS	Fibroblast	1.63717	279.626	-0.380342
CEBPG	Fibroblast	2.429	268.72	0.434732
SOX9	Endothelial	1.96244	261.741	-0.637051
ELF2	Endothelial	1.58194	261.474	-0.458373
JUN	Fibroblast	1.61631	260.213	0.0333374
JUNB	Fibroblast	1.60941	259.124	0.0939433
ELK4	Lymphoid	2.54361	256.121	0.613689
CEBPE	Fibroblast	2.39444	248.053	-0.312431
FOSL2	Fibroblast	1.61874	247.643	0.104462
SMARCC1	Fibroblast	1.55758	238.293	-0.28517
JUND	Fibroblast	1.58935	234.582	0.0465608
FOSL1	Fibroblast	1.5726	232.041	0.0315607
RUNX3	Lymphoid	2.87478	228	0.59723
CBFB	Lymphoid	2.12262	221.787	0.136428
IRF4	Myeloid	1.46309	212.942	0.294186
MEF2C	Cardiomyocyte	1.24225	211.417	-0.0526801
ATF4	Fibroblast	1.83159	206.207	-0.377059
IRF3	Myeloid	1.4522	199.316	0.191784
ETV7	Myeloid	1.53262	198.708	0.442999
ELF4	Myeloid	1.776	191.984	0.62188
NFIC	Cardiomyocyte	1.16781	177.039	0.604942
KLF4	Endothelial	1.36666	173.111	0.7045
BACH1	Fibroblast	1.52887	169.555	0.377571
KLF1	Endothelial	1.4222	168.346	-0.0254594
RBPJ	Pericyte	1.70333	168.255	0.128703
FOSB	Fibroblast	1.51222	165.748	-0.309274
GABPA	Lymphoid	2.41829	163.122	0.231164
PRDM1	Myeloid	1.29932	159.979	0.655256
ERF	Lymphoid	2.54207	156.782	0.446948
ELF1	Lymphoid	2.08778	155.524	0.264329
KLF5	Endothelial	1.32484	155.499	0.0434499
JDP2	Fibroblast	1.61195	152.743	0.0272784
ERG	Lymphoid	2.55045	152.388	0.361172
EBF1	Smooth Muscle	2.41983	151.631	0.66185
ELF2	Lymphoid	1.66703	149.908	-0.458373
ZBTB42	Fibroblast	1.47026	146.528	0.11531
ZNF238	Fibroblast	1.47026	146.528	NA
ETS2	Endothelial	1.45634	145.547	0.753989
ETS2	Lymphoid	1.68013	137.159	0.753989
ETV2	Lymphoid	2.32219	136.991	0.223855
CEBPB	Myeloid	1.58661	135.178	0.266212
ETS1	Lymphoid	2.53513	133.03	0.572741
HLF	Fibroblast	1.82525	131.222	-0.154703
BACH2	Fibroblast	1.4972	128.216	0.264702
FLI1	Lymphoid	2.50694	124.41	0.707522
ETV7	Lymphoid	1.83967	124.105	0.442999
ESRRG	Cardiomyocyte	1.33248	124.1	0.855697
TFAP4	Fibroblast	1.32986	123.648	0.406511
SOX12	Endothelial	1.47767	122.654	-0.536492
ELF5	Lymphoid	1.9023	122.587	0.0794225
ZNF683	Myeloid	1.30372	121.693	0.0567025
ID3	Cardiomyocyte	1.28089	120.662	-0.68738
ID4	Cardiomyocyte	1.28089	120.662	0.027089
ESRRA	Cardiomyocyte	1.32491	119.096	0.246732
TCF21	Fibroblast	1.56825	117.31	0.876533
ENSG00000187728	Fibroblast	1.56825	117.31	NA
ELK4	Myeloid	1.48319	114.435	0.613689
RUNX1	Myeloid	1.1857	113.29	0.192398
SOX13	Endothelial	2.18477	108.531	0.485762
MAFG	Myeloid	1.61495	107.798	0.0657162
FEV	Lymphoid	2.49807	106.827	0.297112
NEUROD1	Cardiomyocyte	1.22805	105.549	-0.148688
SOX11	Endothelial	1.52357	103.745	-0.286981
ETV2	Myeloid	1.5504	103.528	0.223855
NRL	Myeloid	1.44862	103.324	0.170683
MYOD1	Cardiomyocyte	1.23645	101.334	0.724411
MAFK	Myeloid	1.37225	98.4765	-0.368775
STAT6	Endothelial	1.45329	98.4156	-0.126924
MAFF	Myeloid	1.4078	98.3385	-0.302111
PKNOX2	Cardiomyocyte	1.29672	97.7808	0.0868758
ERF	Myeloid	1.55737	92.6282	0.446948
MESP2	Cardiomyocyte	1.26141	92.1679	-0.328223
MESP1	Cardiomyocyte	1.26141	92.1679	0.220945
SP2	Endothelial	1.23268	91.5568	0.136012
NR5A1	Cardiomyocyte	1.2534	91.389	0.723205
SOX30	Endothelial	1.53819	91.0238	-0.275155
NR4A1	Cardiomyocyte	1.25392	90.9892	0.46955
CEBPD	Myeloid	1.42185	90.5552	-0.0310132
ATF5	Myeloid	1.2669	90.54	0.320468
ELK1	Lymphoid	2.38812	90.5088	0.00499638
ENSG00000235187	Lymphoid	2.27661	90.1749	NA
ELK3	Lymphoid	2.42191	90.1427	0.316695
IRF9	Myeloid	1.43149	89.1534	0.568695
STAT6	Myeloid	1.33046	88.9488	-0.126924
IRF8	Myeloid	1.40347	88.4171	0.318987
SMAD1	Cardiomyocyte	1.1808	87.835	-0.390738
TCF4	Cardiomyocyte	1.24744	87.4722	-0.761724
NR2F2	Cardiomyocyte	1.23671	86.9847	-0.685848
ZEB1	Cardiomyocyte	1.24629	86.9343	-0.359869
LMO2	Cardiomyocyte	1.20161	86.5415	-0.356708
PATZ1	Endothelial	1.29903	86.222	0.0465311
ASCL2	Fibroblast	1.37024	85.468	-0.201397
TGIF2LX	Cardiomyocyte	1.32671	85.3628	-0.539048
TGIF2LY	Cardiomyocyte	1.32671	85.3628	NA
ETV7	Endothelial	1.44422	85.1829	0.442999
SP1	Endothelial	1.22472	83.4669	0.484275
PKNOX1	Cardiomyocyte	1.28304	82.7601	-0.00535485
HIC2	Cardiomyocyte	1.25492	82.6308	NA
KLF2	Endothelial	1.36239	81.7066	0.795092
MSC	Fibroblast	1.38224	81.0917	0.643862
ETV2	Endothelial	1.62891	80.196	0.223855
NR4A3	Cardiomyocyte	1.22851	79.9129	0.280752
GABPA	Myeloid	1.46469	79.074	0.231164
TGIF2	Cardiomyocyte	1.3132	78.7272	-0.198921
MAZ	Endothelial	1.16766	77.5808	0.608037
SNAI1	Cardiomyocyte	1.21566	77.4962	-0.041999
ESR2	Cardiomyocyte	1.23384	76.9319	0.829712
NFKB1	Endothelial	1.40399	76.7302	0.254012
NFIX	Cardiomyocyte	1.22376	76.4461	-0.312323
EOMES	Lymphoid	1.87492	75.9821	-0.570139
ELF4	Lymphoid	1.96192	75.6648	0.62188
SNAI2	Cardiomyocyte	1.24579	74.9695	-0.794449
NFIX	Pericyte	1.45789	74.8505	-0.312323
ELK4	Endothelial	1.49737	73.0642	0.613689
ENSG00000235187	Myeloid	1.54692	71.9142	NA
ZNF148	Endothelial	1.18906	71.2797	-0.61049
CIC	Myeloid	1.32951	70.441	-0.388864
ASCL1	Fibroblast	1.2736	69.9744	-0.366524
EHF	Lymphoid	1.88201	69.3928	-0.426807
ATOH1	Cardiomyocyte	1.2227	68.9748	0.346595
EBF1	Endothelial	1.27398	68.7511	0.66185
RREB1	Lymphoid	1.37462	68.1531	-0.723097
CEBPA	Myeloid	1.3299	67.3691	0.728378
NR5A2	Cardiomyocyte	1.20811	67.2969	0.112671
RUNX2	Myeloid	1.25294	67.0625	0.304743
ENSG00000250096	Myeloid	1.25294	67.0625	NA
ESRRB	Cardiomyocyte	1.2505	66.4693	0.632917
TGIF1	Cardiomyocyte	1.24591	65.5651	-0.674464
TAL1	Fibroblast	1.33582	65.4002	-0.321393
TAL2	Fibroblast	1.33582	65.4002	-0.307417
ERG	Myeloid	1.47181	65.2097	0.361172
SP3	Endothelial	1.25317	64.6423	0.457645
REL	Endothelial	1.47618	64.5045	0.405152
MYF6	Fibroblast	1.39433	63.3664	-0.00440566
CBFB	Myeloid	1.28444	63.0344	0.136428
MGA	Lymphoid	1.73038	62.5145	0.586187
FEV	Myeloid	1.53569	61.874	0.297112
NFIB	Cardiomyocyte	1.21779	61.6373	0.251824
TBX10	Lymphoid	1.73958	61.5911	-0.0355349
SP2	Smooth Muscle	1.62248	61.5715	0.136012
MAZ	Smooth Muscle	1.47523	60.4878	0.608037
THAP1	Cardiomyocyte	1.20582	60.4027	0.000993508
ZNF148	Smooth Muscle	1.56445	60.115	-0.61049
ESR1	Cardiomyocyte	1.20223	59.9514	-0.508054
NHLH2	Fibroblast	1.25205	59.6146	0.348115
ZNF740	Endothelial	1.2963	58.6544	-0.0800269
ETV3	Lymphoid	2.12496	58.5116	0.522068
ELF3	Lymphoid	1.79436	58.4886	-0.760251
MYOG	Cardiomyocyte	1.1462	58.278	-0.549787
ZBTB3	Myeloid	1.22061	57.8486	0.069566
SP1	Smooth Muscle	1.60481	56.7897	0.484275
IRF2	Myeloid	1.2741	55.5462	-0.0657098
SOX3	Endothelial	1.42285	54.7909	-0.299009
KLF7	Endothelial	1.3281	54.2876	0.457216
NFIA	Cardiomyocyte	1.20929	54.1062	-0.215094
BATF	Fibroblast	1.31262	53.8314	0.52301
SOX6	Endothelial	1.48892	53.7385	-0.544392
SOX5	Endothelial	1.48892	53.7385	-0.132444
MYF5	Cardiomyocyte	1.16603	53.7305	-0.0469487
ERG	Endothelial	1.55597	53.6555	0.361172
KLF16	Endothelial	1.2381	53.3706	0.473723
SRF	Smooth Muscle	2.45838	53.259	-0.0611663
TBX4	Lymphoid	1.69336	53.1118	-0.386291
TBX5	Lymphoid	1.69336	53.1118	0.536428
RUNX3	Myeloid	1.40757	53.0514	0.59723
TFAP2C	Pericyte	1.2645	52.9254	0.028379
CEBPG	Myeloid	1.58132	52.8794	0.434732
TBR1	Lymphoid	1.69212	52.3712	-0.254576
ZNF263	Pericyte	1.15932	51.9197	-0.0340703
ZNF263	Endothelial	1.1434	51.1587	-0.0340703
MEIS1	Cardiomyocyte	1.20446	51.0382	0.679819
TWIST1	Cardiomyocyte	1.17717	50.4406	-0.764874
SPI1	Lymphoid	1.25164	49.157	0.0404511
MYOG	Fibroblast	1.19291	48.9894	-0.549787
NFE2L2	Myeloid	1.25064	48.825	0.433362
TEF	Fibroblast	1.44376	48.461	0.135574
JUN	Neuronal	1.58658	48.4227	0.0333374
PURA	Endothelial	1.1797	48.2872	0.267937
KLF4	Lymphoid	1.28768	48.2421	0.7045
ZNF263	Smooth Muscle	1.44858	48.1332	-0.0340703
REST	Cardiomyocyte	1.16555	47.5746	-0.310005
NFIC	Fibroblast	1.12347	47.4006	0.604942
IRF9	Lymphoid	1.61702	46.8831	0.568695
KLF5	Smooth Muscle	1.57384	46.5461	0.0434499
JUNB	Neuronal	1.56853	46.4615	0.0939433
RELA	Endothelial	1.33323	46.4162	0.725644
TBX4	Cardiomyocyte	1.22273	46.1301	-0.386291
TBX5	Cardiomyocyte	1.22273	46.1301	0.536428
ATF1	Smooth Muscle	4.22241	45.7296	-0.352644
TCF12	Cardiomyocyte	1.12448	45.5633	0.523071
KLF1	Lymphoid	1.322	44.561	-0.0254594
FOSL2	Neuronal	1.57745	44.4347	0.104462
KLF5	Lymphoid	1.25786	44.2741	0.0434499
ERF	Endothelial	1.49052	44.0629	0.446948
SOX4	Neuronal	1.6507	44.0441	0.334233
ZNF148	Neuronal	1.25875	43.9728	-0.61049
FLI1	Endothelial	1.54114	43.8691	0.707522
KLF15	Endothelial	1.17548	43.5465	-0.568386
NFIA	Pericyte	1.38569	43.5306	-0.215094
NFIB	Pericyte	1.37441	43.3947	0.251824
TP73	Cardiomyocyte	1.18795	43.2703	0.697075
FOS	Neuronal	1.54928	43.2346	-0.380342
NFE2	Fibroblast	1.24073	43.1697	0.361033
SP3	Lymphoid	1.31118	42.9193	0.457645
NKX21	Cardiomyocyte	1.19199	42.785	NA
FLI1	Myeloid	1.40651	42.3195	0.707522
NR2F6	Pericyte	1.41262	42.1249	0.15455
NFATC4	Fibroblast	1.2036	41.8221	0.909251
IRF8	Lymphoid	1.54247	41.5811	0.318987
TFAP2C	Smooth Muscle	1.69959	41.0011	0.028379
ELK3	Myeloid	1.4469	40.7217	0.316695
TFAP4	Pericyte	1.26281	40.6905	0.406511
SP1	Lymphoid	1.23504	40.6525	0.484275
ZFX	Smooth Muscle	1.64704	40.6004	-0.0634595
MITF	Cardiomyocyte	1.18738	40.5981	0.789916
PATZ1	Smooth Muscle	1.67202	40.375	0.0465311
JUND	Neuronal	1.53745	40.3371	0.0465608
NFATC2	Fibroblast	1.21528	40.3146	-0.4042
ZNF75A	Pericyte	1.30395	39.9974	-0.342711
ZNF75D	Pericyte	1.30395	39.9974	0.175115
LINE4118	Pericyte	1.30395	39.9974	NA
WT1	Endothelial	1.18451	39.4991	0.439675
CEBPE	Myeloid	1.50561	39.2898	-0.312431
NR0B1	Pericyte	1.32721	39.1859	0.0716276
SMARCC1	Neuronal	1.49555	39.0505	-0.28517
STAT3	Endothelial	1.26569	38.9859	-0.466564
TCF12	Fibroblast	1.16533	38.8812	0.523071
KLF16	Lymphoid	1.30606	38.6438	0.473723
SNAI3	Cardiomyocyte	1.19472	38.6372	0.721694
ZNF148	Pericyte	1.1521	38.3992	-0.61049
ENSG00000235187	Endothelial	1.50847	37.932	NA
MEIS2	Cardiomyocyte	1.23528	37.8397	0.50755
CREB1	Smooth Muscle	4.04407	37.839	-0.404644
SP1	Neuronal	1.26263	37.7638	0.484275
KLF3	Endothelial	1.28186	37.6583	0.574959
NR2F1	Pericyte	1.35247	37.5928	-0.352358
ENSG00000234254	Cardiomyocyte	1.19392	37.5312	NA
RXRB	Pericyte	1.38945	37.5235	0.278984
ELK1	Myeloid	1.41706	37.4158	0.00499638
MAF	Myeloid	1.29318	37.4121	-0.424559
FOSL1	Neuronal	1.50378	37.3139	0.0315607
RXRA	Pericyte	1.3915	37.2617	0.237011
ETV1	Lymphoid	1.97566	37.2068	0.142131
WT1	Smooth Muscle	1.5846	36.4515	0.439675
ETS1	Myeloid	1.36692	36.0478	0.572741
SOX4	Endothelial	1.32431	35.6865	0.334233
PATZ1	Neuronal	1.33443	35.6708	0.0465311
ELF1	Endothelial	1.31903	35.6375	0.264329
NFATC3	Fibroblast	1.21257	35.4303	-0.387729
ETV4	Lymphoid	1.98663	35.2946	-0.000361947
MAFB	Myeloid	1.26899	35.2481	0.220513
ZNF740	Lymphoid	1.34604	35.199	-0.0800269
MEIS3	Cardiomyocyte	1.20548	35.1314	-0.436603
WT1	Neuronal	1.30569	35.0942	0.439675
ELF5	Endothelial	1.29941	34.8787	0.0794225
KLF15	Smooth Muscle	1.51308	34.8299	-0.568386
IKZF1	Pericyte	1.39117	34.7924	-0.181061
IKZF4	Pericyte	1.39117	34.7924	0.372174
RXRG	Pericyte	1.37457	34.0598	-0.488225
NHLH2	Pericyte	1.26701	33.9982	0.348115
ASCL1	Pericyte	1.26531	33.651	-0.366524
HES7	Cardiomyocyte	1.25686	33.5285	-0.305803
HNF4A	Pericyte	1.29158	33.4573	0.0133209
PITX2	Myeloid	1.19997	33.4548	0.0571612
CREB5	Fibroblast	1.41454	33.4234	0.0828221
PURA	Smooth Muscle	1.48657	33.3869	0.267937
SRY	Endothelial	1.24462	33.3697	NA
DBP	Fibroblast	1.51123	33.3507	0.115494
FUBP1	Myeloid	1.13715	33.2538	-0.145207
STAT1	Endothelial	1.25172	33.1508	0.228104
SMAD4	Cardiomyocyte	1.14855	32.9532	0.665503
PATZ1	Pericyte	1.20077	32.8966	0.0465311
FERD3L	Cardiomyocyte	1.14274	32.8484	-0.582613
MAZ	Pericyte	1.11943	32.8191	0.608037
NR2F2	Pericyte	1.29369	32.7997	-0.685848
LYL1	Fibroblast	1.19874	32.6391	-0.614063
NHLH1	Fibroblast	1.19874	32.6391	0.230306
ASCL2	Pericyte	1.31635	32.2494	-0.201397
BCL11A	Lymphoid	1.23222	32.2147	-0.527369
BCL11B	Lymphoid	1.23222	32.2147	0.0518031
SPDEF	Lymphoid	2.04818	32.08	-0.558073
NFIX	Smooth Muscle	1.90083	31.9222	-0.312323
NFIL3	Fibroblast	1.38008	31.7823	-0.0107319
ZBTB7A	Smooth Muscle	1.60928	31.3997	0.658642
TP63	Cardiomyocyte	1.16225	31.2876	-0.654152
ETS1	Endothelial	1.44357	31.2686	0.572741
FIGLA	Cardiomyocyte	1.16478	31.1409	0.125661
MAFB	Cardiomyocyte	1.1753	30.9204	0.220513
KLF2	Lymphoid	1.33159	30.728	0.795092
ATOH8	Cardiomyocyte	1.14819	30.7148	0.391813
SP8	Endothelial	1.20324	30.6937	0.0797787
SP9	Endothelial	1.20324	30.6937	0.305584
SP7	Endothelial	1.20324	30.6937	0.473959
ZSCAN10	Myeloid	1.22481	30.5714	0.560486
GATA1	Cardiomyocyte	1.17669	30.5039	-0.0252006
NFATC1	Fibroblast	1.20465	30.3339	0.761655
ETV5	Lymphoid	1.96694	30.0693	0.411691
MZF1	Endothelial	1.23527	30.067	NA
ZBTB7A	Endothelial	1.17928	29.9758	0.658642
SP2	Neuronal	1.23002	29.9175	0.136012
CREM	Smooth Muscle	2.4179	29.6667	0.0694572
IRF5	Lymphoid	1.62978	29.5635	0.261855
NFIX	Endothelial	1.2539	29.4899	-0.312323
ZNF281	Endothelial	1.19199	29.4895	0.215377
ETV6	Lymphoid	1.42712	29.4861	0.152659
ZFY	Smooth Muscle	1.58535	29.4186	NA
PLAGL1	Smooth Muscle	1.81872	29.3487	-0.471331
CREB3L3	Smooth Muscle	2.70823	29.3025	-0.159727
CREB3L4	Smooth Muscle	2.70823	29.3025	0.321069
CREB3	Smooth Muscle	2.70823	29.3025	0.44407
PLAGL1	Endothelial	1.24075	29.0886	-0.471331
SP2	Lymphoid	1.19535	29.0648	0.136012
TCF4	Lymphoid	1.39577	28.8814	-0.761724
MITF	Myeloid	1.22483	28.8002	0.789916
ZNF281	Neuronal	1.33491	28.7907	0.215377
MESP2	Lymphoid	1.40455	28.5107	-0.328223
MESP1	Lymphoid	1.40455	28.5107	0.220945
HES5	Cardiomyocyte	1.2441	28.4173	-0.35681
STAT5B	Fibroblast	1.22968	28.3548	0.309572
ZBTB42	Pericyte	1.2828	28.2876	0.11531
ZNF238	Pericyte	1.2828	28.2876	NA
ZNF281	Lymphoid	1.28514	28.2549	0.215377
SP2	Pericyte	1.14054	28.1982	0.136012
KLF7	Lymphoid	1.35515	28.1505	0.457216
TFAP2C	Endothelial	1.17276	28.1131	0.028379
ZNF148	Lymphoid	1.17733	28.0951	-0.61049
MAZ	Neuronal	1.17444	28.0688	0.608037
ETV6	Endothelial	1.27219	28.0599	0.152659
TCF3	Cardiomyocyte	1.14671	28.0216	-0.219124
GABPA	Endothelial	1.34928	27.8872	0.231164
RELB	Endothelial	1.26751	27.7278	0.372559
PLAG1	Smooth Muscle	1.61382	27.7022	-0.122758
KLF4	Smooth Muscle	1.46743	27.6682	0.7045
KLF16	Smooth Muscle	1.55795	27.3503	0.473723
WT1	Lymphoid	1.23109	27.3172	0.439675
KLF15	Neuronal	1.24052	26.8979	-0.568386
SMARCC1	Endothelial	1.22821	26.6988	-0.28517
HIC1	Cardiomyocyte	1.16388	26.6622	-0.845972
NR2C2	Lymphoid	1.52615	26.5996	-0.297058
SP8	Lymphoid	1.28574	26.4358	0.0797787
SP9	Lymphoid	1.28574	26.4358	0.305584
SP7	Lymphoid	1.28574	26.4358	0.473959
SMAD2	Cardiomyocyte	1.13173	26.2952	0.446684
UBP1	Fibroblast	1.13967	26.2582	-0.101335
MEF2C	Pericyte	1.16854	26.0042	-0.0526801
ID3	Lymphoid	1.35464	25.3074	-0.68738
ID4	Lymphoid	1.35464	25.3074	0.027089
RBPJ	Smooth Muscle	1.78779	25.1077	0.128703
PLAG1	Endothelial	1.17542	25.0962	-0.122758
IRF5	Myeloid	1.28739	25.0032	0.261855
ZNF740	Neuronal	1.33531	24.8179	-0.0800269
NFIB	Smooth Muscle	1.85792	24.7431	0.251824
MYPOP	Myeloid	1.52153	24.7255	0.258756
NFAT5	Fibroblast	1.20098	24.6481	-0.0902306
HNF4G	Pericyte	1.23773	24.5349	-0.233131
TFAP2C	Cardiomyocyte	1.08767	24.5223	0.028379
TCF21	Pericyte	1.35478	24.5194	0.876533
ENSG00000187728	Pericyte	1.35478	24.5194	NA
NFIA	Smooth Muscle	1.87811	24.458	-0.215094
HSF4	Fibroblast	1.22797	24.347	-0.526844
SOX17	Neuronal	1.4837	24.2629	0.886428
RARG	Cardiomyocyte	1.16642	24.1609	-0.546304
MAF	Cardiomyocyte	1.16268	24.0671	-0.424559
MYF5	Fibroblast	1.15833	23.994	-0.0469487
NFE2	Myeloid	1.17592	23.9917	0.361033
BACH2	Neuronal	1.4721	23.8671	0.264702
KLF15	Lymphoid	1.19402	23.668	-0.568386
LYL1	Pericyte	1.23796	23.6149	-0.614063
NHLH1	Pericyte	1.23796	23.6149	0.230306
NR3C1	Cardiomyocyte	1.12746	23.5425	-0.0398725
IRF3	Lymphoid	1.29126	23.2023	0.191784
SP4	Lymphoid	1.32424	23.118	0.0753496
BACH1	Neuronal	1.42569	23.1018	0.377571
SP4	Endothelial	1.21233	22.9789	0.0753496
FOSB	Neuronal	1.4157	22.935	-0.309274
STAT5A	Fibroblast	1.21579	22.9083	0.238071
TEAD4	Fibroblast	1.19516	22.8346	0.337493
BCL6	Fibroblast	1.16514	22.6922	-0.464186
SP1	Pericyte	1.12729	22.6777	0.484275
ZFX	Endothelial	1.1445	22.6451	-0.0634595
JDP2	Neuronal	1.51456	22.616	0.0272784
NR0B1	Smooth Muscle	1.74932	22.5902	0.0716276
PPARD	Cardiomyocyte	1.1223	22.2842	0.288234
LYL1	Cardiomyocyte	1.1129	22.1419	-0.614063
NHLH1	Cardiomyocyte	1.1129	22.1419	0.230306
FOSL1	Endothelial	1.2137	21.8091	0.0315607
KLF12	Cardiomyocyte	1.10166	21.7426	-0.196132
ZNF740	Smooth Muscle	1.5895	21.7338	-0.0800269
TFEC	Myeloid	1.27351	21.6202	0.100508
TOPORS	Myeloid	1.14736	21.51	-0.0343916
GATA2	Cardiomyocyte	1.13587	21.418	-0.174591
KLF5	Neuronal	1.20579	21.4028	0.0434499
NR3C1	Pericyte	1.24734	21.3202	-0.0398725
NFKB1	Pericyte	1.22876	21.304	0.254012
PURA	Lymphoid	1.17827	21.2506	0.267937
SCRT2	Cardiomyocyte	1.16125	20.9576	0.700276
MEF2A	Pericyte	1.19233	20.9219	0.579616
ZNF281	Pericyte	1.17724	20.8382	0.215377
IRF7	Myeloid	1.18028	20.7625	0.534896
NR4A1	Pericyte	1.24088	20.474	0.46955
STAT2	Lymphoid	1.17798	20.4096	0.407758
EPAS1	Endothelial	1.21143	20.3991	0.676727
RARA	Cardiomyocyte	1.13437	20.3463	-0.195412
ZNF281	Smooth Muscle	1.52411	20.3092	0.215377
SPIB	Lymphoid	1.24356	19.8877	0.458083
NR2C1	Pericyte	1.23614	19.8592	0.326696
RREB1	Neuronal	1.22903	19.7841	-0.723097
KLF6	Endothelial	1.18313	19.7578	-0.00277893
ASCL1	Cardiomyocyte	1.09877	19.6829	-0.366524
ZEB1	Lymphoid	1.32198	19.5759	-0.359869
SCRT1	Cardiomyocyte	1.15217	19.4595	0.20735
FOSL2	Endothelial	1.20981	19.4399	0.104462
DDIT3	Myeloid	1.21324	19.4266	0.00756632
ATF7	Fibroblast	1.35078	19.4076	-0.143618
KLF16	Neuronal	1.24862	19.4021	0.473723
EPAS1	Lymphoid	1.31345	19.39	0.676727
ESR1	Smooth Muscle	1.70062	19.2138	-0.508054
SP3	Smooth Muscle	1.44481	19.188	0.457645
IRF1	Lymphoid	1.14534	19.1867	0.549229
TFCP2	Cardiomyocyte	1.11593	19.1801	-0.098987
STAT1	Fibroblast	1.14764	19.0513	0.228104
NAIF1	Fibroblast	1.63225	18.9975	0.27766
RREB1	Endothelial	1.1273	18.8519	-0.723097
EGR1	Lymphoid	1.27407	18.6559	0.815398
INSM1	Smooth Muscle	1.60663	18.5208	0.478673
SOX13	Neuronal	1.82057	18.5063	0.485762
RELB	Pericyte	1.23945	18.4881	0.372559
KLF6	Smooth Muscle	1.58939	18.4682	-0.00277893
ID1	Cardiomyocyte	1.21864	18.3475	-0.666855
ID2	Cardiomyocyte	1.21864	18.3475	-0.381272
MGA	Cardiomyocyte	1.13359	18.2449	0.586187
TCF23	Fibroblast	1.34036	18.2109	-0.205383
USF2	Cardiomyocyte	1.15624	18.1272	0.422618
ZNF219	Endothelial	1.14634	18.0704	0.52573
CREM	Pericyte	1.34226	18.0687	0.0694572
NFIA	Endothelial	1.21985	18.0184	-0.215094
TBX20	Lymphoid	1.39084	17.9686	0.418611
IRF6	Myeloid	1.46314	17.8895	-0.532552
PATZ1	Lymphoid	1.20101	17.8636	0.0465311
SPIC	Lymphoid	1.23438	17.8563	0.197033
ENO1	Cardiomyocyte	1.12334	17.8202	0.231355
SP6	Lymphoid	1.28669	17.7748	-0.115727
SP5	Lymphoid	1.28669	17.7748	0.51106
EHF	Endothelial	1.27574	17.7237	-0.426807
SPDEF	Endothelial	1.48477	17.6049	-0.558073
HIVEP3	Pericyte	1.20939	17.4531	-0.869477
HIVEP1	Pericyte	1.20939	17.4531	0.10282
JUNB	Endothelial	1.19091	17.4194	0.0939433
JUND	Endothelial	1.19423	17.3765	0.0465608
TFAP4	Cardiomyocyte	1.08331	17.3259	0.406511
PPARG	Cardiomyocyte	1.14359	17.2797	-0.308801
NFIB	Endothelial	1.20914	17.254	0.251824
GLI1	Endothelial	1.19772	17.2297	-0.0120825
ZNF219	Lymphoid	1.21621	17.2232	0.52573
NPAS2	Cardiomyocyte	1.18632	17.1815	0.588197
TFCP2L1	Cardiomyocyte	1.11381	17.115	0.0333705
ETV3	Myeloid	1.28549	17.0826	0.522068
HSF1	Fibroblast	1.1855	17.0473	-0.627431
CREB5	Neuronal	1.67467	17.0094	0.0828221
TCF12	Pericyte	1.15232	16.9617	0.523071
HIVEP3	Endothelial	1.18609	16.8433	-0.869477
HIVEP1	Endothelial	1.18609	16.8433	0.10282
HDX	Fibroblast	1.14073	16.6742	0.575322
JUN	Endothelial	1.18823	16.6685	0.0333374
HSF2	Fibroblast	1.17146	16.6121	-0.623685
FOXD3	Fibroblast	1.10581	16.4839	0.238953
ZNF691	Cardiomyocyte	1.15148	16.4793	0.150176
STAT5A	Endothelial	1.23317	16.4732	0.238071
LMO2	Lymphoid	1.2405	16.4519	-0.356708
NR3C1	Neuronal	1.34367	16.1974	-0.0398725
LCOR	Fibroblast	1.15917	16.081	0.161181
ZFX	Neuronal	1.21216	15.9956	-0.0634595
MAZ	Lymphoid	1.11304	15.968	0.608037
ZNF384	Fibroblast	1.15418	15.9516	0.427667
MYC	Cardiomyocyte	1.14729	15.9493	-0.542385
RFX5	Cardiomyocyte	1.10964	15.8412	-0.28144
MEF2D	Pericyte	1.1729	15.8357	0.790475
MYOG	Pericyte	1.1523	15.8261	-0.549787
NR1H3	Pericyte	1.26352	15.7911	-0.176404
NR1H2	Pericyte	1.26352	15.7911	0.512962
FERD3L	Fibroblast	1.14117	15.7626	-0.582613
KLF8	Endothelial	1.19049	15.6825	-0.241949
PURA	Neuronal	1.17649	15.6104	0.267937
NR2E3	Myeloid	1.11351	15.5942	-0.754325
BATF3	Fibroblast	1.29136	15.4248	0.660305
SRF	Pericyte	1.23878	15.3497	-0.0611663
CREB3L3	Fibroblast	1.26138	15.2074	-0.159727
CREB3L4	Fibroblast	1.26138	15.2074	0.321069
CREB3	Fibroblast	1.26138	15.2074	0.44407
SREBF1	Lymphoid	1.33527	15.16	-0.200761
E2F6	Neuronal	1.27859	14.8308	-0.100516
MYCN	Cardiomyocyte	1.16764	14.7767	-0.396412
TFAP4	Smooth Muscle	1.46458	14.7344	0.406511
RFX1	Cardiomyocyte	1.15587	14.7029	0.516935
TCF7	Endothelial	1.21875	14.5232	-0.003399
NFKB1	Smooth Muscle	1.56532	14.4915	0.254012
ZBTB7A	Neuronal	1.21658	14.473	0.658642
SNAI1	Endothelial	1.16727	14.3442	-0.041999
ZNF784	Cardiomyocyte	1.17382	14.3022	0.406815
E2F6	Pericyte	1.17098	14.2674	-0.100516
IKZF1	Fibroblast	1.17214	14.1221	-0.181061
IKZF4	Fibroblast	1.17214	14.1221	0.372174
GATA5	Cardiomyocyte	1.14529	14.0034	0.616794
EGR2	Lymphoid	1.36478	13.9797	0.37344
ATF6B	Smooth Muscle	2.769	13.955	0.231918
CR7538031	Smooth Muscle	2.769	13.955	NA
CR9257962	Smooth Muscle	2.769	13.955	NA
AL6628286	Smooth Muscle	2.769	13.955	NA
MXI1	Cardiomyocyte	1.1363	13.868	0.0655214
STAT3	Fibroblast	1.12169	13.8507	-0.466564
E2F6	Endothelial	1.15249	13.846	-0.100516
NKX24	Cardiomyocyte	1.13652	13.7978	NA
E2F6	Smooth Muscle	1.50412	13.7805	-0.100516
ZFY	Endothelial	1.11964	13.7676	NA
ZIC5	Endothelial	1.2022	13.7588	-0.0183927
GLI2	Lymphoid	1.30064	13.5704	-0.161228
AR	Cardiomyocyte	1.17087	13.4765	0.1177
ZNF263	Myeloid	1.05651	13.4263	-0.0340703
STAT5B	Endothelial	1.19978	13.4199	0.309572
PPARD	Pericyte	1.19193	13.4186	0.288234
RFX8	Cardiomyocyte	1.13556	13.3865	-0.131291
ESR2	Smooth Muscle	1.58536	13.3208	0.829712
NR0B1	Neuronal	1.29851	13.3202	0.0716276
SP4	Smooth Muscle	1.53221	13.3036	0.0753496
CREB3L3	Pericyte	1.34676	13.2971	-0.159727
CREB3L4	Pericyte	1.34676	13.2971	0.321069
CREB3	Pericyte	1.34676	13.2971	0.44407
ZNF423	Cardiomyocyte	1.12111	13.2851	-0.665264
USF1	Cardiomyocyte	1.12896	13.2323	0.24472
MAFA	Myeloid	1.11466	13.2187	0.237931
AL8445277	Pericyte	1.23957	13.2157	NA
AL6628245	Pericyte	1.23957	13.2157	NA
CR7597334	Pericyte	1.23957	13.2157	NA
CR3545653	Pericyte	1.23957	13.2157	NA
CR9368773	Pericyte	1.23957	13.2157	NA
ATF1	Pericyte	1.4777	13.205	-0.352644
KLF14	Lymphoid	1.27789	13.1782	0.157519
KLF11	Lymphoid	1.27789	13.1782	0.453979
TFAP2A	Smooth Muscle	1.58389	13.1228	0.227216
HEYL	Cardiomyocyte	1.17474	13.0904	-0.132787
KLF12	Neuronal	1.25373	13.0752	-0.196132
GATA3	Cardiomyocyte	1.13224	13.0291	-0.0666435
NKX26	Cardiomyocyte	1.12791	13.0155	NA
PLAGL1	Neuronal	1.28	12.9936	-0.471331
ZNF202	Neuronal	1.34828	12.929	-0.0274643
ZFY	Cardiomyocyte	1.06324	12.9278	NA
GLI3	Endothelial	1.18074	12.862	0.159765
STAT3	Pericyte	1.16417	12.6913	-0.466564
NR2C2	Endothelial	1.23112	12.5373	-0.297058
RELA	Pericyte	1.18633	12.5272	0.725644
CIC	Cardiomyocyte	1.09435	12.4693	-0.388864
TFAP2B	Smooth Muscle	1.58997	12.4693	-0.346896
NHLH2	Cardiomyocyte	1.07824	12.4351	0.348115
TBX18	Lymphoid	1.38302	12.3058	-0.610861
TBX15	Lymphoid	1.38302	12.3058	-0.484961
TBX22	Lymphoid	1.38302	12.3058	-0.446935
SP8	Smooth Muscle	1.4174	12.2982	0.0797787
SP9	Smooth Muscle	1.4174	12.2982	0.305584
SP7	Smooth Muscle	1.4174	12.2982	0.473959
KLF1	Smooth Muscle	1.35677	12.2484	-0.0254594
ATF7	Neuronal	1.63795	12.2125	-0.143618
RFX7	Cardiomyocyte	1.11664	12.2001	0.0306593
NR4A2	Cardiomyocyte	1.10071	12.1667	-0.580798
NR2F6	Smooth Muscle	1.65528	12.1609	0.15455
TFEB	Myeloid	1.20592	12.1338	0.125409
MNT	Cardiomyocyte	1.16267	12.0975	0.0323786
IRF4	Fibroblast	1.10606	12.0676	0.294186
GFI1	Fibroblast	1.13127	12.0102	-0.228593
MYF6	Pericyte	1.23482	12.0016	-0.00440566
CREB1	Pericyte	1.4772	11.9795	-0.404644
TBX21	Lymphoid	1.52842	11.9592	0.253337
TP53	Cardiomyocyte	1.1359	11.9575	-0.281742
KLF12	Smooth Muscle	1.45401	11.9408	-0.196132
AL8445277	Cardiomyocyte	1.11134	11.9304	NA
AL6628245	Cardiomyocyte	1.11134	11.9304	NA
CR7597334	Cardiomyocyte	1.11134	11.9304	NA
CR3545653	Cardiomyocyte	1.11134	11.9304	NA
CR9368773	Cardiomyocyte	1.11134	11.9304	NA
BACH2	Endothelial	1.18453	11.8966	0.264702
IRF6	Lymphoid	1.75515	11.8696	-0.532552
ATF6	Smooth Muscle	1.89089	11.8631	0.0236385
SMAD1	Neuronal	1.20944	11.8438	-0.390738
NR2E1	Pericyte	1.15815	11.7665	0.208433
TEAD1	Cardiomyocyte	1.09617	11.7631	0.761368
ZIC5	Smooth Muscle	1.62444	11.7186	-0.0183927
KLF5	Pericyte	1.09528	11.7093	0.0434499
ELF3	Endothelial	1.21908	11.619	-0.760251
TCF3	Lymphoid	1.26042	11.5138	-0.219124
POU3F2	Fibroblast	1.16207	11.5133	0.130189
EGR1	Endothelial	1.14031	11.4446	0.815398
NR2C2	Myeloid	1.17018	11.4234	-0.297058
HOXA4	Fibroblast	1.13388	11.3246	0.0270534
E2F7	Fibroblast	1.18615	11.3156	0.535891
IRX6	Fibroblast	1.13056	11.2061	-0.56736
IRX4	Fibroblast	1.13056	11.2061	-0.547431
ZNF263	Neuronal	1.1154	11.1834	-0.0340703
CREM	Neuronal	1.42842	11.1628	0.0694572
ASCL2	Cardiomyocyte	1.08961	11.1561	-0.201397
MLXIP	Cardiomyocyte	1.17047	11.131	-0.51944
CREB5	Smooth Muscle	2.03622	11.1041	0.0828221
MYB	Cardiomyocyte	1.11786	11.0408	-0.127014
FOXP2	Fibroblast	1.11692	11.0118	0.342983
NFE2L2	Fibroblast	1.11751	11.0117	0.433362
NKX25	Cardiomyocyte	1.08464	11.0027	NA
TFEB	Cardiomyocyte	1.13635	10.9223	0.125409
KLF3	Lymphoid	1.22483	10.8847	0.574959
TFAP2E	Endothelial	1.17065	10.8459	-0.0288404
PURA	Pericyte	1.09231	10.8209	0.267937
BATF3	Smooth Muscle	2.08203	10.8096	0.660305
NFKB2	Endothelial	1.21937	10.805	0.480478
NR0B1	Endothelial	1.15123	10.7335	0.0716276
TAL1	Pericyte	1.18593	10.7089	-0.321393
TAL2	Pericyte	1.18593	10.7089	-0.307417
TCF7	Neuronal	1.33059	10.6883	-0.003399
ARNT2	Endothelial	1.15812	10.6659	-0.455713
KLF6	Lymphoid	1.2018	10.6452	-0.00277893
NR1H4	Pericyte	1.22202	10.6444	-0.565782
ARID2	Cardiomyocyte	1.143	10.585	0.0526933
NR1H4	Cardiomyocyte	1.10852	10.5836	-0.565782
EGR4	Lymphoid	1.29343	10.5729	-0.320343
PLAGL1	Pericyte	1.15755	10.5664	-0.471331
XBP1	Smooth Muscle	2.19402	10.4939	0.21177
NR2E1	Myeloid	1.10467	10.4834	0.208433
EGR1	Smooth Muscle	1.44243	10.4659	0.815398
ERG	Pericyte	1.25948	10.4556	0.361172
SNAI2	Lymphoid	1.25005	10.444	-0.794449
ZIC3	Endothelial	1.18399	10.3607	-0.185573
TFAP2C	Neuronal	1.18135	10.3361	0.028379
NR2F1	Smooth Muscle	1.54309	10.3352	-0.352358
FOXA1	Fibroblast	1.11757	10.309	0.284401
E4F1	Smooth Muscle	2.92438	10.2768	0.136089
EGR4	Neuronal	1.33655	10.2723	-0.320343
SPZ1	Smooth Muscle	1.48275	10.2619	0.328567
FOXE1	Fibroblast	1.08048	10.2103	0.138272
CTCF	Cardiomyocyte	1.05701	10.1756	-0.521008
NFIC	Neuronal	1.12552	10.1712	0.604942
SP3	Neuronal	1.17156	10.1656	0.457645
HOXD8	Myeloid	1.1253	10.1404	0.143751
PLAG1	Neuronal	1.19311	10.1134	-0.122758
IRF2	Lymphoid	1.22157	9.99336	-0.0657098
TBX1	Lymphoid	1.23604	9.94816	0.446493
MSC	Pericyte	1.18188	9.93596	0.643862
CREB3L1	Cardiomyocyte	1.14297	9.91796	-0.490533
MEF2B	Pericyte	1.14821	9.91626	0.0398879
AC0021266	Pericyte	1.14821	9.91626	NA
CREB3L3	Neuronal	1.47977	9.89666	-0.159727
CREB3L4	Neuronal	1.47977	9.89666	0.321069
CREB3	Neuronal	1.47977	9.89666	0.44407
SP6	Endothelial	1.13892	9.81296	-0.115727
ATF3	Smooth Muscle	1.87259	9.81296	0.364066
SP5	Endothelial	1.13892	9.81296	0.51106
TFAP2B	Neuronal	1.27518	9.80216	-0.346896
SOX9	Neuronal	1.29868	9.74126	-0.637051
KLF6	Neuronal	1.22383	9.73156	-0.00277893
MYCL1	Cardiomyocyte	1.14132	9.72416	NA
KLF8	Lymphoid	1.2258	9.71466	-0.241949
NFE2L3	Fibroblast	1.14604	9.69926	-0.563886
NFE2L1	Fibroblast	1.14604	9.69926	0.125644
PRDM1	Fibroblast	1.07187	9.66986	0.655256
NEUROG3	Fibroblast	1.22586	9.63606	-0.221163
HIC2	Neuronal	1.27474	9.61426	NA
RFX6	Myeloid	1.10987	9.60066	-0.0586583
SOX10	Fibroblast	1.12998	9.57976	-0.0676334
AR	Pericyte	1.29319	9.50356	0.1177
TBX2	Lymphoid	1.36807	9.49006	-0.73766
TFAP2A	Neuronal	1.26061	9.46686	0.227216
USF1	Myeloid	1.15503	9.45196	0.24472
FOS	Endothelial	1.1398	9.43656	-0.380342
GLI3	Lymphoid	1.23375	9.42416	0.159765
TFAP2A	Endothelial	1.14716	9.38906	0.227216
TFAP2B	Cardiomyocyte	1.0829	9.38296	-0.346896
TCF15	Fibroblast	1.11948	9.36896	-0.542964
SCXB	Fibroblast	1.11948	9.36896	NA
SCXA	Fibroblast	1.11948	9.36896	NA
STAT1	Pericyte	1.14463	9.35376	0.228104
HEY1	Cardiomyocyte	1.14469	9.35256	-0.44145
IRF2	Fibroblast	1.11047	9.34276	-0.0657098
IRF4	Lymphoid	1.17976	9.33486	0.294186
NEUROG2	Fibroblast	1.19719	9.23426	-0.000100749
SNAI1	Lymphoid	1.20204	9.22506	-0.041999
ETV4	Myeloid	1.2374	9.15336	-0.000361947
INSM1	Endothelial	1.12644	9.13906	0.478673
KLF14	Endothelial	1.1514	9.13666	0.157519
KLF11	Endothelial	1.1514	9.13666	0.453979
RXRG	Smooth Muscle	1.57006	9.10986	-0.488225
NR2F2	Smooth Muscle	1.4531	9.10406	-0.685848
SP8	Neuronal	1.19101	9.09846	0.0797787
SP9	Neuronal	1.19101	9.09846	0.305584
SP7	Neuronal	1.19101	9.09846	0.473959
NR3C2	Pericyte	1.21901	9.07856	0.354846
ATF7	Smooth Muscle	2.05294	9.07376	-0.143618
INSM1	Neuronal	1.22147	9.06566	0.478673
KLF4	Neuronal	1.14114	9.05316	0.7045
EGR4	Endothelial	1.17725	8.98126	-0.320343
SIX5	Myeloid	1.14625	8.98066	-0.363455
HOXD10	Fibroblast	1.10622	8.95926	-0.0166118
RXRB	Smooth Muscle	1.55797	8.95816	0.278984
TCF7L2	Endothelial	1.15095	8.95036	-0.402874
NKX25	Myeloid	1.10828	8.91256	NA
HEY2	Cardiomyocyte	1.14902	8.90666	0.286911
PTF1A	Cardiomyocyte	1.06647	8.88186	-0.19672
ARNT2	Smooth Muscle	1.47558	8.81746	-0.455713
ATF4	Myeloid	1.15665	8.80256	-0.377059
RARA	Pericyte	1.17794	8.78786	-0.195412
NR6A1	Cardiomyocyte	1.08365	8.78756	0.779613
TBX2	Cardiomyocyte	1.12492	8.76316	-0.73766
THAP1	Lymphoid	1.21333	8.74176	0.000993508
ZNF784	Lymphoid	1.38235	8.72296	0.406815
FOXO4	Fibroblast	1.09714	8.72096	0.554343
SOX17	Endothelial	1.15943	8.69766	0.886428
ZNF274	Fibroblast	1.10572	8.69746	-0.538109
NR1I2	Myeloid	1.11352	8.68126	0.440426
ZBTB7C	Lymphoid	1.3445	8.67586	0.0727274
CREB5	Pericyte	1.29049	8.65416	0.0828221
PGR	Pericyte	1.15922	8.65216	0.557744
ARID5A	Fibroblast	1.11878	8.64246	-0.0941478
ZNF219	Neuronal	1.17548	8.59586	0.52573
MAX	Cardiomyocyte	1.11525	8.57696	0.264727
ESRRA	Pericyte	1.17047	8.52906	0.246732
ZBTB7A	Lymphoid	1.1415	8.44346	0.658642
EGR1	Neuronal	1.21106	8.43666	0.815398
ELF4	Endothelial	1.19437	8.42276	0.62188
FEV	Endothelial	1.24404	8.42206	0.297112
ETV1	Myeloid	1.2184	8.37586	0.142131
ZFX	Cardiomyocyte	1.04751	8.35896	-0.0634595
PGR	Cardiomyocyte	1.07708	8.35416	0.557744
MECP2	Smooth Muscle	1.61687	8.30366	-0.104431
HMGA1	Myeloid	1.07815	8.27286	0.0573435
ZSCAN10	Endothelial	1.14813	8.27236	0.560486
RXRA	Smooth Muscle	1.53932	8.26166	0.237011
LYL1	Smooth Muscle	1.41241	8.21896	-0.614063
NHLH1	Smooth Muscle	1.41241	8.21896	0.230306
HAND1	Fibroblast	1.11404	8.18106	0.358028
HAND2	Fibroblast	1.11404	8.18106	0.731349
TLX1	Cardiomyocyte	1.10737	8.17006	0.00452918
TLX3	Cardiomyocyte	1.10737	8.17006	0.0544618
NFKB1	Fibroblast	1.09898	8.16396	0.254012
ZNF76	Pericyte	1.13188	8.13516	-0.597822
FLI1	Pericyte	1.24589	8.10246	0.707522
INSM1	Cardiomyocyte	1.06471	8.07216	0.478673
NR2C1	Cardiomyocyte	1.07319	8.07126	0.326696
TEAD1	Fibroblast	1.11422	8.06786	0.761368
REST	Smooth Muscle	1.40405	8.04486	-0.310005
TCF12	Smooth Muscle	1.3068	8.01296	0.523071
NR4A3	Pericyte	1.14246	7.97016	0.280752
C11orf9	Cardiomyocyte	1.14431	7.93046	NA
RARG	Pericyte	1.19133	7.90466	-0.546304
MYOD1	Lymphoid	1.17803	7.88706	0.724411
GLI2	Endothelial	1.1494	7.88466	-0.161228
FOXD2	Fibroblast	1.09627	7.84766	-0.213096
REL	Pericyte	1.17438	7.78126	0.405152
SREBF2	Cardiomyocyte	1.08251	7.73536	0.633441
RFX2	Smooth Muscle	1.52606	7.71426	-0.217919
RELA	Smooth Muscle	1.43449	7.69606	0.725644
PPARD	Endothelial	1.1305	7.67556	0.288234
SIX6	Cardiomyocyte	1.12691	7.65636	-0.262133
AL8445277	Endothelial	1.16343	7.63916	NA
AL6628245	Endothelial	1.16343	7.63916	NA
CR7597334	Endothelial	1.16343	7.63916	NA
CR3545653	Endothelial	1.16343	7.63916	NA
CR9368773	Endothelial	1.16343	7.63916	NA
HIC2	Myeloid	1.10712	7.62096	NA
ZIC5	Neuronal	1.26315	7.61136	-0.0183927
ESR1	Endothelial	1.12928	7.60566	-0.508054
NFE2L2	Cardiomyocyte	1.06757	7.56906	0.433362
ZNF740	Pericyte	1.11357	7.52666	-0.0800269
NFKB2	Lymphoid	1.27698	7.52246	0.480478
ZNF423	Smooth Muscle	1.55813	7.50986	-0.665264
ZNF282	Pericyte	1.16594	7.50966	-0.387014
NFKB2	Myeloid	1.1407	7.50846	0.480478
SREBF2	Lymphoid	1.22681	7.50706	0.633441
ZNF683	Fibroblast	1.07347	7.49576	0.0567025
TFEC	Cardiomyocyte	1.11071	7.48716	0.100508
AL8445277	Smooth Muscle	1.53965	7.47226	NA
AL6628245	Smooth Muscle	1.53965	7.47226	NA
CR7597334	Smooth Muscle	1.53965	7.47226	NA
CR3545653	Smooth Muscle	1.53965	7.47226	NA
CR9368773	Smooth Muscle	1.53965	7.47226	NA
SCRT1	Lymphoid	1.26138	7.46536	0.20735
CDX4	Fibroblast	1.13185	7.44146	-0.0942932
TBX10	Cardiomyocyte	1.08601	7.40766	-0.0355349
ATF6	Lymphoid	1.30908	7.34526	0.0236385
NKX32	Cardiomyocyte	1.08968	7.31266	NA
HSF4	Pericyte	1.17326	7.30176	-0.526844
PLAG1	Pericyte	1.10285	7.29496	-0.122758
SIX2	Cardiomyocyte	1.12798	7.28046	-0.52885
LYL1	Lymphoid	1.17778	7.26116	-0.614063
NHLH1	Lymphoid	1.17778	7.26116	0.230306
RELB	Smooth Muscle	1.44318	7.25566	0.372559
NR2C1	Smooth Muscle	1.41913	7.21206	0.326696
BHLHE22	Fibroblast	1.17902	7.20886	0.757465
FOXH1	Fibroblast	1.12215	7.19056	0.000101936
ZNF350	Endothelial	1.11943	7.17666	-0.0757837
MYF5	Pericyte	1.12027	7.16626	-0.0469487
FOXP4	Neuronal	1.27545	7.13796	-0.651586
FOXK2	Neuronal	1.27545	7.13796	-0.271579
FOXP1	Neuronal	1.27545	7.13796	0.0604428
FOXG1	Neuronal	1.27545	7.13796	0.3817
ZBTB49	Cardiomyocyte	1.10203	7.12586	0.326464
TCF12	Lymphoid	1.13382	7.11806	0.523071
ZNF263	Lymphoid	1.07925	7.10646	-0.0340703
E2F8	Fibroblast	1.12851	7.09686	-0.887172
ZNF713	Myeloid	1.09912	7.05246	0.201982
ELK1	Endothelial	1.22634	7.05076	0.00499638
KLF13	Endothelial	1.17605	7.02436	-0.248929
KLF10	Endothelial	1.17605	7.02436	0.572942
ZIC2	Endothelial	1.14666	6.98366	-0.248519
KLF16	Pericyte	1.09247	6.95696	0.473723
ATF7	Pericyte	1.29133	6.91796	-0.143618
KLF12	Pericyte	1.11487	6.91486	-0.196132
FOXP3	Fibroblast	1.10565	6.88526	0.137545
FOXD4L3	Fibroblast	1.10565	6.88526	NA
FOXD4L5	Fibroblast	1.10565	6.88526	NA
FOXD4L6	Fibroblast	1.10565	6.88526	NA
FOXD4L4	Fibroblast	1.10565	6.88526	NA
FOXD4L2	Fibroblast	1.10565	6.88526	NA
ENSG00000235187	Pericyte	1.22935	6.87496	NA
AL7735441	Fibroblast	1.09255	6.86546	NA
CR3882292	Fibroblast	1.09255	6.86546	NA
AL6628334	Fibroblast	1.09255	6.86546	NA
CR7598154	Fibroblast	1.09255	6.86546	NA
BX0885802	Fibroblast	1.09255	6.86546	NA
CR8477943	Fibroblast	1.09255	6.86546	NA
INSM1	Lymphoid	1.16507	6.84236	0.478673
SPZ1	Pericyte	1.13073	6.84216	0.328567
HES2	Cardiomyocyte	1.12367	6.82006	0.447325
TWIST2	Fibroblast	1.14541	6.81916	0.530524
NFATC4	Pericyte	1.1132	6.80776	0.909251
ARNTL	Cardiomyocyte	1.14179	6.72896	-0.0469947
NR2E1	Smooth Muscle	1.35317	6.71746	0.208433
LMO2	Endothelial	1.10016	6.69126	-0.356708
ZSCAN4	Lymphoid	1.18938	6.67746	-0.00856377
PRDM1	Lymphoid	1.11457	6.67526	0.655256
ZNF350	Pericyte	1.12682	6.65126	-0.0757837
GFI1B	Fibroblast	1.10573	6.61336	-0.646424
GATA1	Endothelial	1.14878	6.60396	-0.0252006
NFE2	Neuronal	1.20571	6.57406	0.361033
ELK3	Endothelial	1.22342	6.56236	0.316695
ZNF350	Neuronal	1.20057	6.56086	-0.0757837
KLF7	Smooth Muscle	1.36037	6.49936	0.457216
NR2F1	Endothelial	1.12841	6.48346	-0.352358
E2F4	Neuronal	1.29319	6.46656	0.0555418
HES1	Cardiomyocyte	1.0852	6.46136	-0.547896
NEUROD6	Fibroblast	1.18125	6.45926	0.10467
NEUROD4	Fibroblast	1.18125	6.45926	0.128501
HAND1	Cardiomyocyte	1.07026	6.43536	0.358028
HAND2	Cardiomyocyte	1.07026	6.43536	0.731349
NR1D2	Fibroblast	1.12906	6.41996	0.152218
BACH2	Smooth Muscle	1.44577	6.41876	0.264702
ENO1	Myeloid	1.10437	6.40276	0.231355
BACH1	Endothelial	1.12346	6.37466	0.377571
ZNF219	Smooth Muscle	1.28009	6.37406	0.52573
SPZ1	Neuronal	1.2008	6.37006	0.328567
NFE2	Cardiomyocyte	1.06274	6.36216	0.361033
HOXA2	Fibroblast	1.13117	6.36066	0.372031
ERF	Pericyte	1.19675	6.34736	0.446948
ZNF683	Lymphoid	1.12986	6.32716	0.0567025
IKZF1	Smooth Muscle	1.48481	6.30836	-0.181061
IKZF4	Smooth Muscle	1.48481	6.30836	0.372174
IRF1	Fibroblast	1.04313	6.30536	0.549229
HIVEP2	Smooth Muscle	1.50431	6.28976	0.125075
HNF4A	Smooth Muscle	1.36638	6.27776	0.0133209
TFCP2	Smooth Muscle	1.39777	6.27686	-0.098987
WT1	Pericyte	1.07958	6.27306	0.439675
PPARD	Smooth Muscle	1.38783	6.26516	0.288234
FOXO6	Fibroblast	1.13486	6.26386	-0.182749
TFE3	Myeloid	1.17123	6.24836	0.252016
MTF1	Lymphoid	1.2857	6.24126	0.233368
HDX	Myeloid	1.08439	6.22816	0.575322
TFAP2E	Smooth Muscle	1.4241	6.19996	-0.0288404
AC2261502	Cardiomyocyte	1.11553	6.19796	NA
ARNT2	Lymphoid	1.18152	6.19696	-0.455713
MYOG	Smooth Muscle	1.27859	6.19126	-0.549787
FIGLA	Lymphoid	1.20137	6.18996	0.125661
BCL6B	Fibroblast	1.10562	6.18956	0.745969
MAFA	Cardiomyocyte	1.05486	6.18646	0.237931
KLF12	Endothelial	1.09838	6.18136	-0.196132
SOX15	Fibroblast	1.11124	6.17786	-0.487041
HOXC6	Fibroblast	1.07903	6.15496	-0.324737
MXI1	Lymphoid	1.25248	6.15236	0.0655214
PLAGL1	Lymphoid	1.16354	6.12296	-0.471331
GATA4	Cardiomyocyte	1.07832	6.10216	0.525218
TBX20	Cardiomyocyte	1.0797	6.09936	0.418611
MZF1	Neuronal	1.18196	6.09006	NA
SP4	Neuronal	1.18875	6.08896	0.0753496
ETV5	Endothelial	1.26603	6.08126	0.411691
RBPJ	Endothelial	1.11241	6.07686	0.128703
BATF3	Pericyte	1.25533	6.07606	0.660305
KLF13	Smooth Muscle	1.54571	6.04666	-0.248929
KLF10	Smooth Muscle	1.54571	6.04666	0.572942
TFAP2B	Endothelial	1.12166	6.02256	-0.346896
GLIS2	Neuronal	1.28394	6.02076	0.197248
ETS1	Pericyte	1.20714	6.00606	0.572741
HOXB9	Fibroblast	1.0978	5.99856	-0.10079
STAT4	Fibroblast	1.12401	5.98956	0.572244
MZF1	Lymphoid	1.15525	5.97776	NA
NR1I3	Myeloid	1.09695	5.97756	0.0862111
ETS2	Smooth Muscle	1.2861	5.96156	0.753989
HOXA5	Myeloid	1.12213	5.95096	0.138088
RARB	Myeloid	1.09385	5.95016	-0.0321026
HNF4A	Endothelial	1.10848	5.94766	0.0133209
HMGA2	Fibroblast	1.1475	5.93516	0.355955
SREBF2	Myeloid	1.10253	5.90436	0.633441
SOX18	Neuronal	1.25002	5.89846	0.882184
NR3C1	Endothelial	1.11572	5.89786	-0.0398725
MZF1	Smooth Muscle	1.33364	5.87846	NA
MAFK	Cardiomyocyte	1.06124	5.87046	-0.368775
SIX4	Cardiomyocyte	1.12231	5.86536	0.414323
TFAP2D	Smooth Muscle	1.27287	5.85756	0.41056
SOX2	Endothelial	1.13993	5.85106	-0.163511
HHEX	Fibroblast	1.12409	5.84126	-0.509047
NR3C2	Fibroblast	1.1236	5.83396	0.354846
PGR	Fibroblast	1.09227	5.81346	0.557744
ZIC2	Lymphoid	1.20259	5.81236	-0.248519
THRB	Cardiomyocyte	1.10028	5.80016	0.307332
FOXS1	Pericyte	1.11133	5.78836	0.525472
ZBTB7A	Pericyte	1.08541	5.78386	0.658642
GLI1	Lymphoid	1.17105	5.77816	-0.0120825
SMAD1	Smooth Muscle	1.26902	5.75076	-0.390738
SOX15	Neuronal	1.24094	5.71196	-0.487041
BATF3	Neuronal	1.39797	5.70026	0.660305
EOMES	Cardiomyocyte	1.07917	5.70006	-0.570139
RORA	Fibroblast	1.11327	5.68346	0.546005
HIF1A	Endothelial	1.24781	5.68326	-0.000731511
SMAD2	Neuronal	1.1948	5.67576	0.446684
MTF1	Cardiomyocyte	1.09694	5.67426	0.233368
MECP2	Neuronal	1.26609	5.63576	-0.104431
ZIC5	Lymphoid	1.19387	5.62576	-0.0183927
EPAS1	Smooth Muscle	1.35895	5.61856	0.676727
GCM1	Cardiomyocyte	1.12436	5.61296	-0.515135
REL	Smooth Muscle	1.44264	5.59416	0.405152
SREBF1	Cardiomyocyte	1.07172	5.58106	-0.200761
ATF4	Neuronal	1.28345	5.56506	-0.377059
CREB3L3	Endothelial	1.19918	5.54046	-0.159727
CREB3L4	Endothelial	1.19918	5.54046	0.321069
CREB3	Endothelial	1.19918	5.54046	0.44407
PLAGL1	Cardiomyocyte	1.05604	5.52766	-0.471331
KLF15	Pericyte	1.06769	5.52526	-0.568386
SOX2	Neuronal	1.23947	5.51596	-0.163511
ZNF423	Endothelial	1.14235	5.49316	-0.665264
MAX	Lymphoid	1.25761	5.47976	0.264727
BATF3	Endothelial	1.21888	5.47156	0.660305
NEUROD1	Smooth Muscle	1.30027	5.41056	-0.148688
MAFF	Fibroblast	1.09221	5.40426	-0.302111
THAP1	Smooth Muscle	1.36208	5.38836	0.000993508
AR	Smooth Muscle	1.66903	5.37246	0.1177
PAX2	Fibroblast	1.17537	5.37056	-0.0824897
EP300	Endothelial	1.11199	5.36876	-0.00898114
SMAD9	Fibroblast	1.09871	5.35846	0.170663
FOXP2	Neuronal	1.18158	5.33556	0.342983
CREB3L1	Smooth Muscle	1.64902	5.29446	-0.490533
HIC2	Smooth Muscle	1.37836	5.28356	NA
PTF1A	Pericyte	1.1034	5.27856	-0.19672
MYCN	Lymphoid	1.27891	5.27706	-0.396412
HIC1	Neuronal	1.23256	5.27166	-0.845972
HOXC10	Fibroblast	1.08654	5.25326	0.0710155
HOXA9	Fibroblast	1.14338	5.25116	-0.0805742
NR4A2	Pericyte	1.13342	5.24666	-0.580798
HNF4A	Cardiomyocyte	1.05558	5.24586	0.0133209
CDX1	Fibroblast	1.09246	5.23966	0.0880171
ZNF423	Pericyte	1.15336	5.23146	-0.665264
GLIS1	Endothelial	1.17775	5.22086	0.0084322
IRX5	Fibroblast	1.12098	5.21176	0.476117
HOXD9	Fibroblast	1.09064	5.20826	0.231459
ASCL1	Smooth Muscle	1.30099	5.18846	-0.366524
NFATC2	Pericyte	1.10628	5.18656	-0.4042
SREBF1	Myeloid	1.09825	5.16816	-0.200761
ATF6B	Pericyte	1.32148	5.16186	0.231918
CR7538031	Pericyte	1.32148	5.16186	NA
CR9257962	Pericyte	1.32148	5.16186	NA
AL6628286	Pericyte	1.32148	5.16186	NA
ZNF76	Smooth Muscle	1.31056	5.15716	-0.597822
ESRRG	Pericyte	1.13213	5.14866	0.855697
ELK4	Pericyte	1.13831	5.14566	0.613689
MECP2	Endothelial	1.14383	5.14026	-0.104431
ETV2	Pericyte	1.16472	5.12626	0.223855
RORB	Cardiomyocyte	1.07836	5.11896	0.233434
TBR1	Cardiomyocyte	1.07278	5.10156	-0.254576
STAT1	Myeloid	1.0748	5.09776	0.228104
GMEB1	Smooth Muscle	2.54555	5.07476	0.103698
KLF13	Lymphoid	1.22634	5.05976	-0.248929
KLF10	Lymphoid	1.22634	5.05976	0.572942
NPAS1	Endothelial	1.28518	5.04826	-0.255263
SIM2	Endothelial	1.28518	5.04826	0.0367104
NPAS3	Endothelial	1.28518	5.04826	0.133794
SIM1	Endothelial	1.28518	5.04826	0.256756
ENSG00000250811	Endothelial	1.28518	5.04826	NA
ETV4	Endothelial	1.22675	5.04556	-0.000361947
PGR	Neuronal	1.19163	4.98016	0.557744
SPZ1	Endothelial	1.10095	4.98006	0.328567
MNT	Lymphoid	1.29162	4.97826	0.0323786
TWIST1	Lymphoid	1.15104	4.97056	-0.764874
HLTF	Fibroblast	1.07723	4.96316	-0.369634
SOX2	Fibroblast	1.10078	4.96046	-0.163511
HIVEP2	Endothelial	1.13426	4.96016	0.125075
RFX7	Lymphoid	1.20602	4.94486	0.0306593
ZNF202	Smooth Muscle	1.39688	4.93196	-0.0274643
NR2F1	Cardiomyocyte	1.06086	4.90956	-0.352358
TFAP2E	Pericyte	1.12578	4.90156	-0.0288404
SOX10	Neuronal	1.20809	4.89786	-0.0676334
ATF2	Fibroblast	1.34928	4.88446	0.0695581
PLAG1	Lymphoid	1.11464	4.85216	-0.122758
PPARA	Cardiomyocyte	1.06243	4.80916	0.647041
HOXD12	Fibroblast	1.08259	4.80776	-0.0747524
SOX1	Neuronal	1.1858	4.80096	-0.150245
SRF	Myeloid	1.09242	4.79566	-0.0611663
KLF1	Neuronal	1.11854	4.76436	-0.0254594
FERD3L	Pericyte	1.10816	4.74886	-0.582613
USF2	Myeloid	1.11274	4.74566	0.422618
EGR2	Neuronal	1.24177	4.72286	0.37344
FOXA2	Fibroblast	1.06888	4.71546	0.144209
NR1H4	Endothelial	1.13265	4.71276	-0.565782
ZFX	Pericyte	1.07153	4.66776	-0.0634595
GLIS2	Endothelial	1.14123	4.66506	0.197248
CRX	Pericyte	1.22302	4.65426	0.354486
FOXJ2	Pericyte	1.08409	4.64226	-0.0906967
SMAD1	Pericyte	1.08182	4.62596	-0.390738
REST	Endothelial	1.09279	4.62286	-0.310005
ETV1	Endothelial	1.20872	4.61456	0.142131
DMRT1	Fibroblast	1.11447	4.61126	0.080935
HLF	Myeloid	1.14101	4.60706	-0.154703
FOXJ1	Fibroblast	1.08587	4.60626	0.138597
FOXD4	Fibroblast	1.08587	4.60626	0.676984
FOXD4L1	Fibroblast	1.08587	4.60626	NA
BPTF	Fibroblast	1.06136	4.58906	-0.2764
ZNF350	Smooth Muscle	1.31186	4.57566	-0.0757837
FOSL1	Lymphoid	1.14527	4.55986	0.0315607
EGR2	Endothelial	1.13464	4.55716	0.37344
HEY1	Lymphoid	1.28286	4.55266	-0.44145
ZIC5	Pericyte	1.12696	4.55026	-0.0183927
CREB1	Lymphoid	1.39854	4.54936	-0.404644
DLX4	Fibroblast	1.17785	4.51186	-0.0154758
TFAP2A	Pericyte	1.11184	4.48996	0.227216
NFIC	Smooth Muscle	1.15325	4.48366	0.604942
FOXA2	Pericyte	1.0942	4.45106	0.144209
T	Lymphoid	1.21865	4.44676	NA
NR4A1	Smooth Muscle	1.32752	4.43786	0.46955
FOXE3	Fibroblast	1.0952	4.42776	0.0473345
FOXD1	Fibroblast	1.0952	4.42776	0.502566
RFX3	Smooth Muscle	1.59132	4.42526	0.413181
UBP1	Pericyte	1.0796	4.42256	-0.101335
LBX2	Fibroblast	1.14084	4.42096	0.218321
FOXK1	Fibroblast	1.08238	4.41846	0.510442
KIAA0415	Fibroblast	1.08238	4.41846	NA
HOXC12	Fibroblast	1.07984	4.41206	-0.0769663
RELB	Fibroblast	1.08152	4.39496	0.372559
FOXP3	Neuronal	1.18844	4.35326	0.137545
GSC	Fibroblast	1.13778	4.35326	0.572385
FOXD4L3	Neuronal	1.18844	4.35326	NA
FOXD4L5	Neuronal	1.18844	4.35326	NA
FOXD4L6	Neuronal	1.18844	4.35326	NA
FOXD4L4	Neuronal	1.18844	4.35326	NA
FOXD4L2	Neuronal	1.18844	4.35326	NA
PITX3	Pericyte	1.16621	4.35306	0.197165
MYCL1	Lymphoid	1.26433	4.34886	NA
ATF6B	Lymphoid	1.40773	4.34376	0.231918
CR7538031	Lymphoid	1.40773	4.34376	NA
CR9257962	Lymphoid	1.40773	4.34376	NA
AL6628286	Lymphoid	1.40773	4.34376	NA
ZNF524	Myeloid	1.09295	4.34336	-0.00428489
USF2	Lymphoid	1.21118	4.33696	0.422618
ZFY	Neuronal	1.11663	4.32876	NA
PRDM16	Fibroblast	1.08788	4.31996	0.444835
NR2E1	Cardiomyocyte	1.04712	4.31416	0.208433
ZSCAN16	Cardiomyocyte	1.06644	4.30826	0.245933
TFAP2B	Pericyte	1.11352	4.30746	-0.346896
FOXP3	Lymphoid	1.16104	4.28856	0.137545
FOXD4L3	Lymphoid	1.16104	4.28856	NA
FOXD4L5	Lymphoid	1.16104	4.28856	NA
FOXD4L6	Lymphoid	1.16104	4.28856	NA
FOXD4L4	Lymphoid	1.16104	4.28856	NA
FOXD4L2	Lymphoid	1.16104	4.28856	NA
GLIS2	Lymphoid	1.20525	4.28026	0.197248
CDX2	Fibroblast	1.07974	4.27496	-0.0378598
FEZF2	Fibroblast	1.07916	4.26596	-0.109134
FEZF1	Fibroblast	1.07916	4.26596	0.196221
E2F4	Endothelial	1.13436	4.26056	0.0555418
PTF1A	Myeloid	1.06521	4.23296	-0.19672
MEF2A	Smooth Muscle	1.25133	4.22286	0.579616
NHLH2	Smooth Muscle	1.27088	4.20536	0.348115
TFCP2L1	Smooth Muscle	1.33692	4.19106	0.0333705
UNCX	Fibroblast	1.09579	4.18346	0.195937
SIX1	Cardiomyocyte	1.11025	4.17936	0.0533728
SCRT2	Lymphoid	1.19842	4.17786	0.700276
SOX18	Endothelial	1.11889	4.15276	0.882184
SOX30	Neuronal	1.19075	4.14646	-0.275155
JDP2	Endothelial	1.12054	4.14366	0.0272784
HSF2	Pericyte	1.11935	4.13966	-0.623685
CPEB1	Fibroblast	1.05914	4.13906	0.138224
ATF3	Lymphoid	1.24924	4.13906	0.364066
KLF8	Cardiomyocyte	1.05276	4.12946	-0.241949
NEUROG1	Fibroblast	1.13947	4.12256	0.175373
THRA	Cardiomyocyte	1.08499	4.10596	0.368699
MEF2B	Smooth Muscle	1.28083	4.09716	0.0398879
AC0021266	Smooth Muscle	1.28083	4.09716	NA
E2F8	Pericyte	1.1376	4.09626	-0.887172
ZSCAN10	Lymphoid	1.1568	4.07006	0.560486
UBP1	Neuronal	1.12102	4.06016	-0.101335
NEUROD2	Fibroblast	1.16487	4.05476	-0.463511
ZNF384	Pericyte	1.10848	4.05126	0.427667
POU6F2	Fibroblast	1.10669	4.03356	-0.270045
ELF2	Pericyte	1.07482	4.01776	-0.458373
IRF7	Fibroblast	1.07905	4.01746	0.534896
NKX28	Cardiomyocyte	1.06736	4.00346	NA
NKX61	Fibroblast	1.06838	4.00196	NA
TBP	Cardiomyocyte	1.06581	4.00186	0.360855
SMARCC1	Lymphoid	1.1309	3.99766	-0.28517
ASCL2	Smooth Muscle	1.32173	3.99186	-0.201397
USF1	Lymphoid	1.19617	3.98166	0.24472
TFE3	Lymphoid	1.26868	3.97846	0.252016
GSX2	Fibroblast	1.09564	3.95606	0.0967075
ZNF202	Lymphoid	1.16293	3.95086	-0.0274643
RORB	Pericyte	1.13949	3.93116	0.233434
NFATC3	Pericyte	1.09761	3.92436	-0.387729
FOXO4	Neuronal	1.14556	3.92306	0.554343
ATF1	Lymphoid	1.35108	3.91796	-0.352644
HIVEP3	Fibroblast	1.06935	3.89236	-0.869477
HIVEP1	Fibroblast	1.06935	3.89236	0.10282
DMRTA2	Fibroblast	1.10165	3.89016	-0.171469
HOXA11	Fibroblast	1.09703	3.86696	0.202393
HIVEP3	Smooth Muscle	1.28741	3.84366	-0.869477
HIVEP1	Smooth Muscle	1.28741	3.84366	0.10282
MEF2C	Smooth Muscle	1.18693	3.82166	-0.0526801
ARID3C	Fibroblast	1.06764	3.80426	0.0332432
HES7	Myeloid	1.12072	3.79826	-0.305803
MLX	Lymphoid	1.32797	3.79136	0.0259194
PRDM4	Endothelial	1.10284	3.78496	0.332147
FOXQ1	Fibroblast	1.06779	3.75506	-0.0536263
SOX1	Fibroblast	1.07329	3.74466	-0.150245
TP73	Smooth Muscle	1.32695	3.74436	0.697075
TCF7L2	Neuronal	1.17094	3.74236	-0.402874
SOHLH2	Smooth Muscle	1.73276	3.74216	-0.392919
C13orf38SOHLH2	Smooth Muscle	1.73276	3.74216	NA
NKX23	Cardiomyocyte	1.07268	3.71376	NA
KLF14	Smooth Muscle	1.31568	3.71286	0.157519
KLF11	Smooth Muscle	1.31568	3.71286	0.453979
ZBTB3	Lymphoid	1.10606	3.71116	0.069566
NR4A2	Neuronal	1.1786	3.70166	-0.580798
HOXD13	Fibroblast	1.07873	3.67386	0.106213
BHLHA15	Fibroblast	1.1518	3.66806	0.143472
FOSL2	Lymphoid	1.13571	3.65926	0.104462
HOXB13	Fibroblast	1.08363	3.64676	-0.227571
BPTF	Lymphoid	1.10538	3.64386	-0.2764
SOX15	Endothelial	1.10888	3.61886	-0.487041
NR3C1	Smooth Muscle	1.29705	3.61586	-0.0398725
PAX5	Cardiomyocyte	1.06444	3.61576	0.297336
STAT3	Smooth Muscle	1.25684	3.60166	-0.466564
ZIC3	Lymphoid	1.16283	3.57806	-0.185573
STAT6	Lymphoid	1.12428	3.56836	-0.126924
RFX3	Neuronal	1.27895	3.55786	0.413181
STAT5A	Pericyte	1.11786	3.54846	0.238071
FOXE3	Neuronal	1.19171	3.54636	0.0473345
FOXD1	Neuronal	1.19171	3.54636	0.502566
SMARCC1	Smooth Muscle	1.26656	3.54536	-0.28517
NR3C1	Fibroblast	1.07042	3.54386	-0.0398725
DBX2	Fibroblast	1.07739	3.53216	-0.173889
HLX	Fibroblast	1.07739	3.53216	-0.0407414
AC0125311	Fibroblast	1.07739	3.53216	NA
MEF2D	Smooth Muscle	1.23869	3.52916	0.790475
SOX18	Fibroblast	1.08589	3.52496	0.882184
SNAI2	Endothelial	1.09527	3.52436	-0.794449
TBX3	Myeloid	1.07105	3.50616	-0.396132
OLIG3	Fibroblast	1.12869	3.49946	-0.1334
BCL11A	Endothelial	1.04988	3.47606	-0.527369
BCL11B	Endothelial	1.04988	3.47606	0.0518031
TFCP2	Endothelial	1.08977	3.46446	-0.098987
TP53	Smooth Muscle	1.44587	3.45996	-0.281742
SMARCC2	Pericyte	1.10858	3.44336	0.310978
FOXJ3	Neuronal	1.15788	3.44086	-0.714873
TFDP1	Endothelial	1.17736	3.44056	-0.690415
TFDP2	Endothelial	1.17736	3.44056	-0.329243
TFDP3	Endothelial	1.17736	3.44056	0.136279
GLI3	Fibroblast	1.07272	3.43636	0.159765
NR5A2	Endothelial	1.0843	3.43286	0.112671
GLIS2	Smooth Muscle	1.40164	3.42966	0.197248
AHR	Smooth Muscle	1.43128	3.42056	-0.00980937
AHRR	Smooth Muscle	1.43128	3.42056	0.119675
ZSCAN4	Fibroblast	1.07013	3.40996	-0.00856377
HSF1	Pericyte	1.11571	3.40496	-0.627431
KLF8	Smooth Muscle	1.28702	3.38856	-0.241949
ZFY	Pericyte	1.06527	3.38806	NA
STAT5B	Pericyte	1.10986	3.38756	0.309572
ZNF76	Endothelial	1.07708	3.37846	-0.597822
FOSB	Endothelial	1.08835	3.37846	-0.309274
ZIC1	Endothelial	1.1243	3.36926	-0.358286
TLX2	Fibroblast	1.0901	3.36766	-0.146085
MAFA	Pericyte	1.08174	3.34446	0.237931
BACH2	Lymphoid	1.14712	3.34416	0.264702
HIC1	Smooth Muscle	1.34666	3.34056	-0.845972
OLIG2	Fibroblast	1.13357	3.32156	-0.140677
ZFP161	Lymphoid	1.27113	3.30136	NA
NEUROG2	Pericyte	1.16598	3.30016	-0.000100749
EGR3	Neuronal	1.25906	3.29046	0.476249
ATF6	Endothelial	1.13528	3.27896	0.0236385
ETS2	Pericyte	1.0719	3.26216	0.753989
HOXB4	Fibroblast	1.08744	3.25596	-0.00984458
INSM1	Pericyte	1.08319	3.24926	0.478673
HNF4G	Smooth Muscle	1.25133	3.24636	-0.233131
KLF13	Neuronal	1.21067	3.24226	-0.248929
KLF10	Neuronal	1.21067	3.24226	0.572942
PITX3	Fibroblast	1.10178	3.23876	0.197165
NFKB1	Myeloid	1.06157	3.20416	0.254012
RORC	Cardiomyocyte	1.05903	3.19326	0.518037
FOXP2	Pericyte	1.08848	3.18596	0.342983
PROX1	Neuronal	1.32643	3.18186	-0.857636
TEAD4	Cardiomyocyte	1.05012	3.17876	0.337493
ZNF589	Cardiomyocyte	1.07593	3.15306	-0.221265
PTF1A	Endothelial	1.07274	3.15256	-0.19672
ETV5	Pericyte	1.21097	3.14006	0.411691
SMAD4	Neuronal	1.14565	3.13616	0.665503
NR5A1	Pericyte	1.09249	3.13276	0.723205
ZNF354C	Cardiomyocyte	1.02888	3.12076	-0.00930946
FOXC2	Fibroblast	1.0828	3.11466	-0.236426
REL	Fibroblast	1.07787	3.07906	0.405152
ZBTB6	Cardiomyocyte	1.05313	3.07326	-0.141442
SOX8	Fibroblast	1.08323	3.07206	-0.355517
ZHX1	Fibroblast	1.26638	3.06676	0.0467394
HOXC5	Fibroblast	1.08788	3.06126	-0.439155
PAX3	Lymphoid	1.36244	3.05926	-0.0272524
CREB3L3	Lymphoid	1.22483	3.04836	-0.159727
CREB3L4	Lymphoid	1.22483	3.04836	0.321069
CREB3	Lymphoid	1.22483	3.04836	0.44407
MYOG	Lymphoid	1.09096	3.04586	-0.549787
RFX2	Cardiomyocyte	1.05404	3.03526	-0.217919
FOXD3	Pericyte	1.06368	3.02986	0.238953
ESR2	Endothelial	1.08317	3.02856	0.829712
ZIC3	Cardiomyocyte	1.054	3.01516	-0.185573
GLIS1	Lymphoid	1.20537	3.00956	0.0084322
NR1H3	Smooth Muscle	1.33839	2.99986	-0.176404
NR1H2	Smooth Muscle	1.33839	2.99986	0.512962
TBX3	Lymphoid	1.12828	2.99956	-0.396132
CDC5L	Fibroblast	1.08716	2.99436	0.0922342
MAFK	Fibroblast	1.06313	2.99046	-0.368775
ARNTL2	Cardiomyocyte	1.08518	2.98756	-0.105922
NR1I3	Pericyte	1.0979	2.98446	0.0862111
TBX18	Cardiomyocyte	1.06661	2.98316	-0.610861
TBX15	Cardiomyocyte	1.06661	2.98316	-0.484961
TBX22	Cardiomyocyte	1.06661	2.98316	-0.446935
TP63	Smooth Muscle	1.29789	2.98036	-0.654152
THAP1	Neuronal	1.1442	2.97806	0.000993508
GLI1	Cardiomyocyte	1.04448	2.96936	-0.0120825
HES5	Myeloid	1.11058	2.95486	-0.35681
FOXJ3	Fibroblast	1.06548	2.94976	-0.714873
JUNB	Lymphoid	1.11771	2.94886	0.0939433
NFE2L2	Neuronal	1.13596	2.94266	0.433362
POU1F1	Fibroblast	1.07137	2.89056	-0.0922383
NKX62	Fibroblast	1.0849	2.87596	NA
MZF1	Pericyte	1.07902	2.87586	NA
PKNOX2	Lymphoid	1.13708	2.86696	0.0868758
GLI1	Smooth Muscle	1.26122	2.86376	-0.0120825
TBX21	Cardiomyocyte	1.08983	2.85076	0.253337
SOX21	Endothelial	1.09665	2.85066	0.0469955
ZBTB7B	Lymphoid	1.2139	2.85046	0.176974
PAX1	Cardiomyocyte	1.09398	2.84556	-0.0846587
TFCP2L1	Endothelial	1.08494	2.84436	0.0333705
HOXA5	Fibroblast	1.08569	2.84216	0.138088
MYF5	Smooth Muscle	1.22429	2.84086	-0.0469487
JUND	Lymphoid	1.11776	2.84046	0.0465608
AR	Endothelial	1.14405	2.83536	0.1177
ETV4	Pericyte	1.18819	2.83256	-0.000361947
SOX21	Fibroblast	1.07544	2.82906	0.0469955
ARNTL	Lymphoid	1.25952	2.82896	-0.0469947
NFATC1	Pericyte	1.08665	2.81586	0.761655
ESRRB	Pericyte	1.10205	2.80816	0.632917
NR1H4	Smooth Muscle	1.33808	2.79166	-0.565782
KLF2	Smooth Muscle	1.21012	2.78536	0.795092
HOXC11	Fibroblast	1.11104	2.78506	0.189629
HLTF	Cardiomyocyte	1.04061	2.78276	-0.369634
TBX19	Lymphoid	1.23032	2.78106	-0.211927
EP300	Smooth Muscle	1.26482	2.77756	-0.00898114
CREB1	Neuronal	1.36258	2.77436	-0.404644
MYC	Lymphoid	1.17061	2.77306	-0.542385
HOXC8	Fibroblast	1.0912	2.77266	0.0173657
NR1D1	Fibroblast	1.07486	2.77236	-0.00928282
POU5F1	Fibroblast	1.06245	2.77066	0.43178
NR2C1	Myeloid	1.06137	2.76866	0.326696
RARG	Endothelial	1.10265	2.76486	-0.546304
ATF3	Pericyte	1.1485	2.76116	0.364066
ZNF75A	Fibroblast	1.05546	2.75756	-0.342711
ZNF75D	Fibroblast	1.05546	2.75756	0.175115
LINE4118	Fibroblast	1.05546	2.75756	NA
ZNF713	Lymphoid	1.12135	2.75546	0.201982
ZNF35	Fibroblast	1.04462	2.74926	-0.0142921
SOX21	Neuronal	1.16658	2.74016	0.0469955
FOXL1	Myeloid	1.1032	2.72406	-0.614859
FOXO3	Fibroblast	1.09293	2.72226	-0.153842
FOXO1	Fibroblast	1.09293	2.72226	0.527039
CREB3L2	Cardiomyocyte	1.07756	2.70026	-0.0234992
SMAD5	Smooth Muscle	1.32115	2.69876	0.29438
YBX1	Smooth Muscle	1.33512	2.68886	0.144876
RFX2	Neuronal	1.1641	2.68586	-0.217919
STAT2	Fibroblast	1.03356	2.67886	0.407758
ARID3A	Fibroblast	1.03574	2.67876	-0.115478
RARG	Smooth Muscle	1.33246	2.67086	-0.546304
E2F3	Fibroblast	1.10127	2.66436	-0.370644
PKNOX1	Lymphoid	1.13749	2.66046	-0.00535485
BATF	Neuronal	1.15168	2.65866	0.52301
STAT6	Pericyte	1.07876	2.65556	-0.126924
GLIS3	Lymphoid	1.17838	2.65196	-0.375836
ETV3	Endothelial	1.14349	2.64676	0.522068
EGR3	Lymphoid	1.20017	2.64316	0.476249
KLF3	Smooth Muscle	1.23847	2.64126	0.574959
IRX2	Fibroblast	1.0932	2.63926	0.466349
HNF4G	Cardiomyocyte	1.03816	2.63266	-0.233131
FERD3L	Lymphoid	1.11106	2.63246	-0.582613
RFX3	Pericyte	1.15013	2.61966	0.413181
TWIST1	Endothelial	1.07308	2.61716	-0.764874
RARB	Pericyte	1.08917	2.61396	-0.0321026
PTF1A	Fibroblast	1.05207	2.60146	-0.19672
RFX4	Smooth Muscle	1.43022	2.59856	-0.18025
CREB3L1	Lymphoid	1.20512	2.59226	-0.490533
E4F1	Lymphoid	1.39888	2.59146	0.136089
MLX	Myeloid	1.13771	2.58306	0.0259194
MLXIPL	Myeloid	1.14498	2.56646	-0.122827
SOX7	Fibroblast	1.07397	2.55916	0.740144
RARA	Endothelial	1.08729	2.55906	-0.195412
GCM1	Lymphoid	1.2369	2.54726	-0.515135
SP6	Smooth Muscle	1.23148	2.54606	-0.115727
SP5	Smooth Muscle	1.23148	2.54606	0.51106
AR	Neuronal	1.24166	2.54526	0.1177
NAIF1	Myeloid	1.22154	2.54186	0.27766
HOXC13	Fibroblast	1.05993	2.53516	-0.0343924
MECOM	Fibroblast	1.07668	2.52876	-0.532388
THRB	Pericyte	1.13531	2.51496	0.307332
ISL2	Cardiomyocyte	1.07607	2.51496	0.677188
GSC	Pericyte	1.14899	2.51366	0.572385
HOXD3	Fibroblast	1.07479	2.50276	0.267206
TERF2	Myeloid	1.09794	2.49876	-0.170491
CREM	Lymphoid	1.17124	2.47546	0.0694572
MAFK	Neuronal	1.12868	2.46346	-0.368775
POU3F1	Fibroblast	1.07442	2.45236	0.0510737
FOXA3	Fibroblast	1.04507	2.45086	0.434676
HNF4G	Neuronal	1.11808	2.45016	-0.233131
TFAP2D	Lymphoid	1.08262	2.44856	0.41056
JUN	Lymphoid	1.10866	2.44746	0.0333374
NR5A1	Smooth Muscle	1.24302	2.44506	0.723205
ARNTL2	Myeloid	1.11033	2.44126	-0.105922
ARNTL2	Lymphoid	1.21553	2.41826	-0.105922
ZIC4	Lymphoid	1.12264	2.41636	-0.546158
HIVEP3	Myeloid	1.05443	2.39526	-0.869477
HIVEP1	Myeloid	1.05443	2.39526	0.10282
TCF23	Pericyte	1.17165	2.37826	-0.205383
ID1	Lymphoid	1.21954	2.37316	-0.666855
ID2	Lymphoid	1.21954	2.37316	-0.381272
POU2F2	Myeloid	1.06486	2.36336	0.326192
BRCA1	Cardiomyocyte	1.04959	2.35766	0.211788
EPAS1	Pericyte	1.07892	2.35726	0.676727
NR2C1	Endothelial	1.07324	2.35416	0.326696
ZIC4	Cardiomyocyte	1.04369	2.34146	-0.546158
PHOX2A	Fibroblast	1.07538	2.32736	-0.4447
NR1D2	Pericyte	1.11062	2.32496	0.152218
GLI3	Myeloid	1.05969	2.31446	0.159765
SOX11	Neuronal	1.13085	2.30916	-0.286981
AL8445277	Neuronal	1.15901	2.30716	NA
AL6628245	Neuronal	1.15901	2.30716	NA
CR7597334	Neuronal	1.15901	2.30716	NA
CR3545653	Neuronal	1.15901	2.30716	NA
CR9368773	Neuronal	1.15901	2.30716	NA
FOSL1	Smooth Muscle	1.22468	2.29566	0.0315607
HEY2	Lymphoid	1.21347	2.29366	0.286911
ATF7	Endothelial	1.15209	2.28856	-0.143618
NPAS2	Lymphoid	1.18978	2.28336	0.588197
FERD3L	Smooth Muscle	1.22389	2.28026	-0.582613
BHLHE40	Lymphoid	1.22282	2.27766	0.0854414
RELA	Neuronal	1.12648	2.27416	0.725644
GSX1	Fibroblast	1.0864	2.26676	-0.109029
KLF6	Pericyte	1.06829	2.25956	-0.00277893
MSX1	Fibroblast	1.10308	2.25736	0.0177659
NR4A3	Endothelial	1.06942	2.25716	0.280752
RORB	Fibroblast	1.0758	2.25646	0.233434
BHLHE40	Cardiomyocyte	1.07911	2.24706	0.0854414
MAFA	Endothelial	1.06136	2.24566	0.237931
ARNT2	Neuronal	1.12793	2.24286	-0.455713
FEV	Pericyte	1.13952	2.24026	0.297112
BPTF	Myeloid	1.04306	2.23736	-0.2764
NR5A1	Endothelial	1.07151	2.23736	0.723205
GLIS3	Neuronal	1.19081	2.22576	-0.375836
MYC	Endothelial	1.10149	2.22326	-0.542385
PHOX2B	Fibroblast	1.07687	2.21536	-0.176385
RELA	Myeloid	1.05533	2.20996	0.725644
HOXC9	Fibroblast	1.07422	2.18256	-0.343673
HOXB3	Fibroblast	1.08404	2.17586	-0.392145
KLF8	Neuronal	1.12445	2.17046	-0.241949
HIC1	Lymphoid	1.12964	2.16736	-0.845972
E2F7	Pericyte	1.11511	2.14916	0.535891
MBD2	Endothelial	1.09374	2.13776	0.20545
MXI1	Endothelial	1.09909	2.13756	0.0655214
MEIS2	Lymphoid	1.1544	2.13646	0.50755
TFAP2E	Cardiomyocyte	1.0415	2.11276	-0.0288404
RARA	Smooth Muscle	1.26098	2.10936	-0.195412
RFX5	Smooth Muscle	1.24128	2.10496	-0.28144
E2F2	Lymphoid	1.33195	2.10236	0.543714
HMX1	Fibroblast	1.07136	2.09946	0.0630794
TBX21	Fibroblast	1.11183	2.08956	0.253337
IRF3	Endothelial	1.05753	2.08536	0.191784
BATF	Myeloid	1.05973	2.07016	0.52301
EGR3	Endothelial	1.11759	2.06796	0.476249
TFAP2D	Endothelial	1.05063	2.06036	0.41056
GLIS3	Endothelial	1.10458	2.05976	-0.375836
RELA	Fibroblast	1.05406	2.05646	0.725644
ISL1	Fibroblast	1.0771	2.05626	-0.236942
MESP2	Endothelial	1.07043	2.04356	-0.328223
MESP1	Endothelial	1.07043	2.04356	0.220945
FOXP3	Endothelial	1.07454	2.03616	0.137545
FOXD4L3	Endothelial	1.07454	2.03616	NA
FOXD4L5	Endothelial	1.07454	2.03616	NA
FOXD4L6	Endothelial	1.07454	2.03616	NA
FOXD4L4	Endothelial	1.07454	2.03616	NA
FOXD4L2	Endothelial	1.07454	2.03616	NA
BARHL1	Fibroblast	1.08808	2.02396	0.301833
FOXJ1	Neuronal	1.12948	2.02226	0.138597
FOXD4	Neuronal	1.12948	2.02226	0.676984
FOXD4L1	Neuronal	1.12948	2.02226	NA
RORA	Pericyte	1.09679	2.02156	0.546005
HOXA6	Fibroblast	1.07782	2.02056	-0.242717
SIX6	Lymphoid	1.18473	2.01796	-0.262133
ZSCAN16	Lymphoid	1.12806	2.01056	0.245933
ZNF143	Smooth Muscle	1.26075	2.01036	0.33632
NR2E1	Endothelial	1.05988	2.00616	0.208433
CLOCK	Cardiomyocyte	1.07818	2.00126	-0.258153
FOXE3	Lymphoid	1.12563	1.99946	0.0473345
FOXD1	Lymphoid	1.12563	1.99946	0.502566
LHX5	Fibroblast	1.07085	1.99486	-0.273272
LHX1	Fibroblast	1.07085	1.99486	-0.177865
FOS	Lymphoid	1.09826	1.98926	-0.380342
HNF4G	Endothelial	1.06129	1.98926	-0.233131
ATOH1	Lymphoid	1.10378	1.98406	0.346595
HOXD11	Fibroblast	1.10298	1.98366	0.194443
RREB1	Smooth Muscle	1.13444	1.98196	-0.723097
FOXO4	Pericyte	1.06627	1.98126	0.554343
DLX2	Fibroblast	1.10653	1.97566	-0.317256
DLX3	Fibroblast	1.10653	1.97566	0.227046
TEAD4	Endothelial	1.07334	1.96876	0.337493
ESRRA	Smooth Muscle	1.24488	1.95316	0.246732
TFEB	Lymphoid	1.1628	1.95076	0.125409
TCFL5	Lymphoid	1.27406	1.94516	0.0442009
BHLHE41	Myeloid	1.12725	1.94296	-0.271647
THRA	Pericyte	1.12081	1.94286	0.368699
RFX6	Cardiomyocyte	1.03532	1.93116	-0.0586583
SIX4	Lymphoid	1.19991	1.92956	0.414323
NR5A2	Pericyte	1.07084	1.92506	0.112671
NR5A2	Smooth Muscle	1.20882	1.92376	0.112671
NR4A3	Smooth Muscle	1.20981	1.92176	0.280752
BHLHE41	Cardiomyocyte	1.08867	1.91796	-0.271647
EP300	Lymphoid	1.10287	1.91026	-0.00898114
POU6F1	Fibroblast	1.06616	1.90136	-0.154178
IRF8	Fibroblast	1.05828	1.89706	0.318987
VENTX	Fibroblast	1.07599	1.89246	-0.250138
GABPA	Pericyte	1.09923	1.88766	0.231164
RFX8	Lymphoid	1.14324	1.87986	-0.131291
FOXO3	Neuronal	1.17583	1.87896	-0.153842
FOXO1	Neuronal	1.17583	1.87896	0.527039
HOXB6	Fibroblast	1.07397	1.87716	-0.265267
ARNT	Myeloid	1.13043	1.87576	0.0547266
VDR	Pericyte	1.10313	1.86896	0.214898
ATF2	Smooth Muscle	1.98288	1.85946	0.0695581
SIX2	Lymphoid	1.18391	1.85306	-0.52885
PRRX1	Fibroblast	1.07297	1.84986	-0.312181
OSR1	Neuronal	1.16723	1.84696	-0.354395
ZIC4	Endothelial	1.07161	1.83756	-0.546158
ZKSCAN4	Endothelial	1.11053	1.82606	-0.442766
ZKSCAN3	Endothelial	1.11053	1.82606	0.0848002
EP300	Myeloid	1.05185	1.82516	-0.00898114
FOXJ2	Fibroblast	1.03829	1.81206	-0.0906967
SNAI3	Lymphoid	1.11727	1.81126	0.721694
ENSG00000229544	Fibroblast	1.09834	1.80926	NA
LCOR	Pericyte	1.07597	1.80036	0.161181
EGR4	Smooth Muscle	1.26433	1.79916	-0.320343
TFAP2A	Cardiomyocyte	1.03586	1.79516	0.227216
FOXE3	Endothelial	1.07913	1.79296	0.0473345
FOXD1	Endothelial	1.07913	1.79296	0.502566
XBP1	Lymphoid	1.21522	1.79286	0.21177
NOBOX	Fibroblast	1.0811	1.79226	-0.298315
SMARCC2	Smooth Muscle	1.23587	1.78036	0.310978
VTN	Fibroblast	1.07453	1.77866	-0.208857
ASCL1	Lymphoid	1.08332	1.77726	-0.366524
RFX4	Lymphoid	1.16445	1.77646	-0.18025
ESR2	Pericyte	1.07155	1.77166	0.829712
GMEB2	Fibroblast	1.24974	1.77036	0.191616
FOXN3	Neuronal	1.12258	1.76486	-0.174389
FOXL2	Neuronal	1.12258	1.76486	-0.043353
FOXN2	Neuronal	1.12258	1.76486	0.343737
HINFP	Lymphoid	1.36994	1.75756	0.349287
THRB	Smooth Muscle	1.34348	1.75576	0.307332
CREM	Endothelial	1.09651	1.75476	0.0694572
ZNF202	Endothelial	1.07334	1.75056	-0.0274643
FOSB	Lymphoid	1.0981	1.74956	-0.309274
MEIS1	Lymphoid	1.10493	1.74356	0.679819
TEAD1	Endothelial	1.06927	1.73886	0.761368
GATA1	Lymphoid	1.1177	1.72876	-0.0252006
ETV7	Pericyte	1.06814	1.72386	0.442999
ZNF423	Lymphoid	1.12334	1.72016	-0.665264
TFE3	Cardiomyocyte	1.06451	1.71866	0.252016
ESR1	Neuronal	1.11014	1.71716	-0.508054
DPRX	Pericyte	1.15345	1.71646	-0.464077
ETV5	Smooth Muscle	1.48235	1.71416	0.411691
TGIF2LX	Lymphoid	1.12732	1.71356	-0.539048
TGIF2LY	Lymphoid	1.12732	1.71356	NA
CREM	Fibroblast	1.07478	1.71286	0.0694572
SMAD4	Fibroblast	1.04917	1.70806	0.665503
TGIF2	Lymphoid	1.12687	1.70086	-0.198921
ATF6B	Endothelial	1.16905	1.68496	0.231918
CR7538031	Endothelial	1.16905	1.68496	NA
CR9257962	Endothelial	1.16905	1.68496	NA
AL6628286	Endothelial	1.16905	1.68496	NA
SMAD2	Smooth Muscle	1.20157	1.68146	0.446684
SOX17	Fibroblast	1.05616	1.67846	0.886428
MYOD1	Endothelial	1.0557	1.67826	0.724411
FOXN3	Fibroblast	1.05352	1.66906	-0.174389
FOXL2	Fibroblast	1.05352	1.66906	-0.043353
FOXN2	Fibroblast	1.05352	1.66906	0.343737
NR4A1	Endothelial	1.06286	1.66476	0.46955
CIC	Neuronal	1.1133	1.66426	-0.388864
CTCFL	Smooth Muscle	1.14525	1.66296	0.340017
LBX1	Cardiomyocyte	1.05665	1.66006	-0.260867
FOXK1	Neuronal	1.11602	1.65996	0.510442
KIAA0415	Neuronal	1.11602	1.65996	NA
HAND1	Pericyte	1.07419	1.65816	0.358028
HAND2	Pericyte	1.07419	1.65816	0.731349
SOX14	Endothelial	1.08919	1.65596	0.103692
E2F1	Lymphoid	1.36787	1.65016	-0.102327
FOXP4	Endothelial	1.07679	1.64606	-0.651586
FOXK2	Endothelial	1.07679	1.64606	-0.271579
FOXP1	Endothelial	1.07679	1.64606	0.0604428
FOXG1	Endothelial	1.07679	1.64606	0.3817
ARNTL	Myeloid	1.10265	1.64296	-0.0469947
TFCP2	Neuronal	1.11062	1.62726	-0.098987
ZIC1	Cardiomyocyte	1.04829	1.62436	-0.358286
THRA	Smooth Muscle	1.33347	1.62026	0.368699
LEF1	Myeloid	1.04837	1.61686	0.0680214
FOXM1	Fibroblast	1.03488	1.61596	0.315567
ATOH1	Myeloid	1.04871	1.61386	0.346595
PPARA	Pericyte	1.07524	1.60876	0.647041
ZNF350	Lymphoid	1.08767	1.60386	-0.0757837
MAX	Myeloid	1.07282	1.59396	0.264727
MEIS3	Lymphoid	1.12257	1.58716	-0.436603
CREB3L2	Lymphoid	1.16953	1.58496	-0.0234992
E4F1	Pericyte	1.22921	1.58426	0.136089
EPAS1	Neuronal	1.10456	1.58036	0.676727
RELB	Neuronal	1.11254	1.57656	0.372559
PITX1	Fibroblast	1.08822	1.57526	-0.0375461
MYB	Myeloid	1.06502	1.56756	-0.127014
VDR	Neuronal	1.15155	1.55996	0.214898
MAFB	Neuronal	1.12857	1.55786	0.220513
JUND	Smooth Muscle	1.19228	1.55156	0.0465608
PAX5	Lymphoid	1.12063	1.55056	0.297336
RFX3	Lymphoid	1.16218	1.55026	0.413181
PAX9	Cardiomyocyte	1.06294	1.54426	-0.261526
JUNB	Smooth Muscle	1.18826	1.54276	0.0939433
ZIC4	Smooth Muscle	1.21583	1.53806	-0.546158
GLIS3	Smooth Muscle	1.30211	1.53466	-0.375836
NFYC	Neuronal	1.13788	1.52806	-0.0859709
REST	Pericyte	1.0608	1.52526	-0.310005
GCM2	Lymphoid	1.23219	1.52116	-0.613191
MLXIPL	Lymphoid	1.2244	1.51586	-0.122827
USF2	Smooth Muscle	1.27825	1.50726	0.422618
FOXA3	Pericyte	1.05075	1.49606	0.434676
ZNF652	Fibroblast	1.06418	1.49426	0.0310181
ZBTB47	Fibroblast	1.06418	1.49426	0.0903741
HSF4	Endothelial	1.0731	1.48836	-0.526844
SMAD1	Lymphoid	1.06568	1.48456	-0.390738
ETV1	Pericyte	1.13469	1.48326	0.142131
RHOXF1	Fibroblast	1.1008	1.47946	-0.0950957
ZIC2	Neuronal	1.12209	1.47446	-0.248519
TEAD3	Cardiomyocyte	1.0389	1.47326	0.325828
MLL	Lymphoid	1.26839	1.47016	NA
YBX1	Pericyte	1.08537	1.46946	0.144876
DUXA	Fibroblast	1.06422	1.46706	-0.189359
GATA2	Lymphoid	1.10098	1.46576	-0.174591
TGIF1	Lymphoid	1.10269	1.46276	-0.674464
STAT3	Neuronal	1.09091	1.46166	-0.466564
ATF5	Fibroblast	1.03446	1.45676	0.320468
FOXP4	Fibroblast	1.05694	1.44766	-0.651586
MAF	Pericyte	1.08272	1.44766	-0.424559
FOXK2	Fibroblast	1.05694	1.44766	-0.271579
FOXP1	Fibroblast	1.05694	1.44766	0.0604428
FOXG1	Fibroblast	1.05694	1.44766	0.3817
HIF1A	Smooth Muscle	1.43042	1.44606	-0.000731511
SPI1	Endothelial	1.02923	1.44286	0.0404511
CRX	Fibroblast	1.09059	1.43536	0.354486
BARX1	Fibroblast	1.05252	1.43276	-0.394381
BARHL2	Fibroblast	1.09297	1.43216	-0.0736895
ZIC4	Neuronal	1.11244	1.43096	-0.546158
ZSCAN4	Cardiomyocyte	1.03282	1.42756	-0.00856377
ZNF589	Smooth Muscle	1.32004	1.42146	-0.221265
HOXA13	Fibroblast	1.05105	1.41696	-0.222311
ENSG00000215754	Fibroblast	1.05965	1.40976	NA
ENSG00000217642	Fibroblast	1.05965	1.40976	NA
ENSG00000224558	Fibroblast	1.05965	1.40976	NA
ENSG00000225958	Fibroblast	1.05965	1.40976	NA
ENSG00000226866	Fibroblast	1.05965	1.40976	NA
DUX4L5	Fibroblast	1.05965	1.40976	NA
ENSG00000227522	Fibroblast	1.05965	1.40976	NA
DUX4L2	Fibroblast	1.05965	1.40976	NA
DUX4L3	Fibroblast	1.05965	1.40976	NA
DUX4L6	Fibroblast	1.05965	1.40976	NA
ENSG00000228710	Fibroblast	1.05965	1.40976	NA
CT4768282	Fibroblast	1.05965	1.40976	NA
ENSG00000230380	Fibroblast	1.05965	1.40976	NA
ENSG00000230776	Fibroblast	1.05965	1.40976	NA
AL5921702	Fibroblast	1.05965	1.40976	NA
ENSG00000232923	Fibroblast	1.05965	1.40976	NA
ENSG00000233294	Fibroblast	1.05965	1.40976	NA
ENSG00000233361	Fibroblast	1.05965	1.40976	NA
ENSG00000233698	Fibroblast	1.05965	1.40976	NA
ENSG00000233794	Fibroblast	1.05965	1.40976	NA
ENSG00000234550	Fibroblast	1.05965	1.40976	NA
ENSG00000236207	Fibroblast	1.05965	1.40976	NA
ENSG00000237516	Fibroblast	1.05965	1.40976	NA
ENSG00000250589	Fibroblast	1.05965	1.40976	NA
DUX4	Fibroblast	1.05965	1.40976	NA
LINE11277	Fibroblast	1.05965	1.40976	NA
LINE11282	Fibroblast	1.05965	1.40976	NA
TLX1	Endothelial	1.08496	1.40696	0.00452918
TLX3	Endothelial	1.08496	1.40696	0.0544618
ATOH8	Lymphoid	1.08991	1.40546	0.391813
HIF1A	Lymphoid	1.19287	1.39926	-0.000731511
MLXIP	Lymphoid	1.17439	1.39826	-0.51944
HOXB1	Cardiomyocyte	1.04809	1.39686	-0.389476
ZFHX3	Fibroblast	1.07365	1.38906	-0.613886
HOXB2	Fibroblast	1.07017	1.38306	-0.460898
HEYL	Lymphoid	1.1634	1.37916	-0.132787
NFKB2	Smooth Muscle	1.26455	1.37346	0.480478
NPAS1	Smooth Muscle	1.51829	1.37216	-0.255263
SIM2	Smooth Muscle	1.51829	1.37216	0.0367104
NPAS3	Smooth Muscle	1.51829	1.37216	0.133794
SIM1	Smooth Muscle	1.51829	1.37216	0.256756
ENSG00000250811	Smooth Muscle	1.51829	1.37216	NA
RHOXF1	Pericyte	1.13781	1.37096	-0.0950957
BACH1	Lymphoid	1.08992	1.36956	0.377571
ZKSCAN4	Cardiomyocyte	1.05314	1.36946	-0.442766
ZKSCAN3	Cardiomyocyte	1.05314	1.36946	0.0848002
PAX9	Myeloid	1.08509	1.36756	-0.261526
ZNF524	Lymphoid	1.10561	1.36156	-0.00428489
ZNF333	Cardiomyocyte	1.05351	1.36036	-0.0637407
CREB5	Endothelial	1.1073	1.36026	0.0828221
AHR	Lymphoid	1.12842	1.35406	-0.00980937
AHRR	Lymphoid	1.12842	1.35406	0.119675
KLF9	Lymphoid	1.4016	1.35216	0.573903
FOXF2	Fibroblast	1.05327	1.34356	0.130385
NFE2	Smooth Muscle	1.17906	1.34156	0.361033
GMEB1	Lymphoid	1.34775	1.33646	0.103698
VSX1	Cardiomyocyte	1.05499	1.33386	0.379751
STAT3	Myeloid	1.03885	1.33076	-0.466564
ATOH8	Endothelial	1.05803	1.31936	0.391813
NKX63	Fibroblast	1.0659	1.31826	NA
RFX4	Neuronal	1.16775	1.31666	-0.18025
ESR2	Neuronal	1.09976	1.31246	0.829712
RFX3	Fibroblast	1.07802	1.31206	0.413181
ETV1	Smooth Muscle	1.38498	1.30826	0.142131
BHLHE40	Smooth Muscle	1.38131	1.30776	0.0854414
ZNF32	Myeloid	1.07492	1.30666	-0.385393
GBX2	Fibroblast	1.07527	1.30106	0.0649342
RBPJ	Fibroblast	1.04269	1.29976	0.128703
OTX1	Pericyte	1.14821	1.29956	0.103536
LHX9	Fibroblast	1.07624	1.29326	-0.384931
PRRX2	Fibroblast	1.07624	1.29326	-0.349933
SHOX2	Fibroblast	1.07624	1.29326	-0.308692
RAX2	Fibroblast	1.07624	1.29326	0.0408461
SHOX	Fibroblast	1.07624	1.29326	NA
TCF7L1	Pericyte	1.06343	1.28896	-0.0542694
ZNF282	Myeloid	1.05042	1.28576	-0.387014
NR2F2	Endothelial	1.05372	1.28296	-0.685848
RFX2	Endothelial	1.06714	1.28206	-0.217919
TFCP2L1	Neuronal	1.10398	1.28146	0.0333705
GSC2	Pericyte	1.11044	1.27926	-0.109108
GATA3	Endothelial	1.07919	1.27696	-0.0666435
GATA2	Fibroblast	1.04945	1.27446	-0.174591
ZBTB4	Lymphoid	1.13144	1.26996	0.264509
MAFK	Smooth Muscle	1.1778	1.26806	-0.368775
ARNT	Cardiomyocyte	1.07709	1.26336	0.0547266
MAF	Neuronal	1.12398	1.25826	-0.424559
MAFA	Lymphoid	1.07172	1.25646	0.237931
RFX8	Smooth Muscle	1.25963	1.24046	-0.131291
MIXL1	Fibroblast	1.0671	1.23796	-0.0362802
MBD2	Neuronal	1.12952	1.23706	0.20545
RFX5	Lymphoid	1.08835	1.23056	-0.28144
OVOL1	Fibroblast	1.0718	1.22836	0.128336
NHLH2	Neuronal	1.08256	1.22816	0.348115
XBP1	Endothelial	1.12029	1.22776	0.21177
NFE2	Endothelial	1.05298	1.21666	0.361033
TP53	Endothelial	1.08323	1.21206	-0.281742
ZIC2	Smooth Muscle	1.20924	1.21056	-0.248519
SIX1	Lymphoid	1.17432	1.20976	0.0533728
PAX6	Fibroblast	1.07494	1.20536	0.255225
E2F4	Smooth Muscle	1.24574	1.19926	0.0555418
NHLH2	Lymphoid	1.07039	1.19366	0.348115
ATF6	Pericyte	1.09445	1.19106	0.0236385
HES5	Lymphoid	1.14379	1.18976	-0.35681
GSC2	Fibroblast	1.07602	1.18946	-0.109108
MAX	Smooth Muscle	1.27216	1.18176	0.264727
HIVEP2	Pericyte	1.07618	1.18056	0.125075
NFAT5	Pericyte	1.06425	1.17946	-0.0902306
PGR	Endothelial	1.05603	1.17946	0.557744
ARNTL	Smooth Muscle	1.38185	1.16516	-0.0469947
MBD2	Smooth Muscle	1.2357	1.16336	0.20545
NKX32	Myeloid	1.05384	1.16286	NA
ZBTB49	Smooth Muscle	1.26207	1.15656	0.326464
HES1	Smooth Muscle	1.22859	1.15306	-0.547896
ARNT	Smooth Muscle	1.45923	1.14946	0.0547266
OSR2	Lymphoid	1.12759	1.14496	-0.66167
HMX2	Fibroblast	1.05502	1.14246	-0.000628155
RFX5	Neuronal	1.09935	1.14006	-0.28144
ARNTL2	Smooth Muscle	1.33721	1.13366	-0.105922
ELF2	Smooth Muscle	1.12332	1.13336	-0.458373
NR1I2	Pericyte	1.06163	1.13116	0.440426
HES2	Myeloid	1.07594	1.12786	0.447325
ZNF282	Fibroblast	1.04822	1.12456	-0.387014
STAT1	Smooth Muscle	1.15537	1.11776	0.228104
RFX3	Endothelial	1.09322	1.11376	0.413181
FOXA1	Pericyte	1.05749	1.11026	0.284401
DPRX	Fibroblast	1.09038	1.11016	-0.464077
RFX5	Endothelial	1.05615	1.10896	-0.28144
SPDEF	Smooth Muscle	1.41641	1.10616	-0.558073
SMAD2	Pericyte	1.05731	1.10356	0.446684
MXI1	Myeloid	1.05782	1.10316	0.0655214
HLTF	Neuronal	1.08633	1.10026	-0.369634
TBX1	Myeloid	1.04244	1.09616	0.446493
MTF1	Smooth Muscle	1.27385	1.09556	0.233368
OSR1	Cardiomyocyte	1.04159	1.09416	-0.354395
ZNF274	Myeloid	1.03949	1.09366	-0.538109
ATF2	Lymphoid	1.34201	1.08996	0.0695581
ZIC3	Smooth Muscle	1.20559	1.08966	-0.185573
CEBPE	Neuronal	1.19464	1.08816	-0.312431
OLIG1	Fibroblast	1.08562	1.08696	0.19444
ZSCAN10	Cardiomyocyte	1.03114	1.08496	0.560486
GATA4	Fibroblast	1.0503	1.06916	0.525218
NANOGP1	Fibroblast	1.07054	1.06896	NA
NR3C2	Cardiomyocyte	1.03923	1.06386	0.354846
EN2	Fibroblast	1.06527	1.05836	-0.182984
BHLHE23	Fibroblast	1.08605	1.04896	-0.138234
ZNF691	Lymphoid	1.11232	1.04866	0.150176
SP3	Pericyte	1.03705	1.04736	0.457645
RORC	Pericyte	1.07269	1.04266	0.518037
PPARA	Myeloid	1.04427	1.04206	0.647041
TFDP1	Pericyte	1.11435	1.03746	-0.690415
TFDP2	Pericyte	1.11435	1.03746	-0.329243
TFDP3	Pericyte	1.11435	1.03746	0.136279
ZSCAN4	Endothelial	1.05264	1.03476	-0.00856377
ZBTB49	Neuronal	1.13398	1.03306	0.326464
BHLHE40	Myeloid	1.08072	1.03256	0.0854414
ZNF202	Pericyte	1.06482	1.02936	-0.0274643
ELK4	Smooth Muscle	1.19529	1.02766	0.613689
HES4	Lymphoid	1.15794	1.02756	-0.0932625
ENSG00000234254	Lymphoid	1.09332	1.02516	NA
FOSL2	Smooth Muscle	1.16498	1.02366	0.104462
RFX4	Pericyte	1.0947	1.01366	-0.18025
FOXB2	Pericyte	1.05517	1.00296	-0.131825
BHLHE41	Lymphoid	1.18889	1.00256	-0.271647
FEZF2	Neuronal	1.09197	1.00096	-0.109134
FEZF1	Neuronal	1.09197	1.00096	0.196221
HES7	Lymphoid	1.12947	0.996957	-0.305803
TEAD4	Neuronal	1.09614	0.990457	0.337493
ESRRG	Smooth Muscle	1.18363	0.989157	0.855697
EGR2	Smooth Muscle	1.22023	0.987957	0.37344
FOSB	Myeloid	1.03983	0.986857	-0.309274
HOMEZ	Fibroblast	1.08205	0.985557	0.268764
LIN54	Fibroblast	1.04112	0.984557	0.165246
ZBTB6	Smooth Muscle	1.19244	0.984457	-0.141442
SPZ1	Lymphoid	1.07288	0.983657	0.328567
DNMT1	Neuronal	1.11067	0.976357	0.602282
GATA2	Endothelial	1.05671	0.975557	-0.174591
HOXA3	Fibroblast	1.08334	0.968757	0.370049
ZNF75A	Neuronal	1.07852	0.968457	-0.342711
ZNF75D	Neuronal	1.07852	0.968457	0.175115
LINE4118	Neuronal	1.07852	0.968457	NA
ZNF75A	Smooth Muscle	1.14493	0.958757	-0.342711
ZNF75D	Smooth Muscle	1.14493	0.958757	0.175115
LINE4118	Smooth Muscle	1.14493	0.958757	NA
PPARG	Endothelial	1.06641	0.958257	-0.308801
FOXF2	Neuronal	1.1038	0.953357	0.130385
ZNF713	Fibroblast	1.03979	0.952657	0.201982
ATOH1	Smooth Muscle	1.16383	0.947457	0.346595
LMX1B	Fibroblast	1.06734	0.946857	-0.387384
RXRB	Endothelial	1.05806	0.931957	0.278984
HNF1B	Fibroblast	1.06037	0.928857	0.0716368
TFAP2B	Lymphoid	1.07796	0.924657	-0.346896
HAND1	Smooth Muscle	1.17221	0.924057	0.358028
HAND2	Smooth Muscle	1.17221	0.924057	0.731349
REL	Neuronal	1.10292	0.922457	0.405152
ATOH7	Fibroblast	1.06892	0.920957	0.470986
ATF5	Pericyte	1.04027	0.920257	0.320468
FOXO3	Endothelial	1.07426	0.918657	-0.153842
CXXC1	Pericyte	1.15835	0.918657	0.505036
FOXO1	Endothelial	1.07426	0.918657	0.527039
IRX1	Fibroblast	1.04542	0.917757	0.00244421
IRX3	Fibroblast	1.04542	0.917757	0.172598
ZHX1	Smooth Muscle	1.69198	0.912757	0.0467394
RORC	Lymphoid	1.09451	0.910357	0.518037
PBX3	Neuronal	1.11505	0.900257	-0.356671
RFX2	Lymphoid	1.08805	0.895857	-0.217919
MYCL1	Myeloid	1.06624	0.893357	NA
ATF6B	Cardiomyocyte	1.07069	0.891657	0.231918
CR7538031	Cardiomyocyte	1.07069	0.891657	NA
CR9257962	Cardiomyocyte	1.07069	0.891657	NA
AL6628286	Cardiomyocyte	1.07069	0.891657	NA
OSR1	Myeloid	1.05454	0.885757	-0.354395
IRF9	Endothelial	1.05753	0.880257	0.568695
ELK3	Pericyte	1.09743	0.870157	0.316695
SREBF2	Endothelial	1.05536	0.865857	0.633441
PRDM4	Pericyte	1.05907	0.858457	0.332147
FERD3L	Myeloid	1.03547	0.856657	-0.582613
POU2F2	Lymphoid	1.08211	0.852357	0.326192
PDX1	Fibroblast	1.09197	0.849457	-0.0526744
FOXC1	Fibroblast	1.04019	0.848857	0.627337
HNF4G	Myeloid	1.03353	0.848457	-0.233131
DBP	Myeloid	1.08454	0.846257	0.115494
RFX7	Smooth Muscle	1.2008	0.843557	0.0306593
GLIS1	Smooth Muscle	1.25702	0.843457	0.0084322
HMX3	Fibroblast	1.05382	0.836457	-0.287475
PPARG	Smooth Muscle	1.20608	0.833257	-0.308801
TEAD3	Neuronal	1.09927	0.827757	0.325828
POU3F4	Myeloid	1.04772	0.822157	-0.320129
TBX1	Cardiomyocyte	1.02679	0.818957	0.446493
NFYB	Smooth Muscle	1.20938	0.818557	-0.350117
MYCN	Endothelial	1.07915	0.817257	-0.396412
HOXA7	Fibroblast	1.07054	0.812857	-0.135973
FOXF2	Pericyte	1.06154	0.809357	0.130385
HSF4	Myeloid	1.04448	0.801857	-0.526844
TFEC	Lymphoid	1.11095	0.798157	0.100508
DRGX	Fibroblast	1.05177	0.796857	-0.277026
MAFA	Neuronal	1.06973	0.794557	0.237931
MAFB	Smooth Muscle	1.18279	0.791857	0.220513
PROX1	Pericyte	1.11123	0.790157	-0.857636
XBP1	Pericyte	1.11159	0.778957	0.21177
BHLHE41	Smooth Muscle	1.37814	0.777057	-0.271647
TEAD1	Neuronal	1.08769	0.774457	0.761368
NANOG	Fibroblast	1.06406	0.773057	0.0650304
HES1	Lymphoid	1.09064	0.769557	-0.547896
ZNF76	Neuronal	1.07135	0.768957	-0.597822
TEAD4	Pericyte	1.05497	0.759257	0.337493
RXRA	Endothelial	1.05435	0.758657	0.237011
FOXC1	Pericyte	1.05427	0.757257	0.627337
ATF1	Neuronal	1.19667	0.749057	-0.352644
ISX	Fibroblast	1.05401	0.748057	-0.0414753
HDX	Pericyte	1.04646	0.747657	0.575322
NEUROD1	Lymphoid	1.05758	0.745957	-0.148688
RFX6	Smooth Muscle	1.14261	0.745257	-0.0586583
PAX4	Fibroblast	1.07343	0.743657	-0.0539007
ALX4	Fibroblast	1.0513	0.738957	-0.228337
BCL6	Endothelial	1.04201	0.738157	-0.464186
TFE3	Smooth Muscle	1.27973	0.738057	0.252016
HOXB8	Fibroblast	1.0506	0.736057	-0.349666
NFE2L3	Neuronal	1.10024	0.734957	-0.563886
NFE2L1	Neuronal	1.10024	0.734957	0.125644
MNT	Myeloid	1.06355	0.734157	0.0323786
FOXE1	Pericyte	1.03397	0.731757	0.138272
KLF14	Neuronal	1.08364	0.730857	0.157519
KLF11	Neuronal	1.08364	0.730857	0.453979
THRB	Endothelial	1.07328	0.730557	0.307332
GMEB2	Smooth Muscle	1.78497	0.728757	0.191616
DDIT3	Fibroblast	1.04603	0.726357	0.00756632
SOHLH2	Cardiomyocyte	1.05735	0.725857	-0.392919
C13orf38SOHLH2	Cardiomyocyte	1.05735	0.725857	NA
GLIS1	Neuronal	1.12994	0.722357	0.0084322
ZBTB12	Myeloid	1.05068	0.720657	-0.422556
AL8448538	Myeloid	1.05068	0.720657	NA
CR7597843	Myeloid	1.05068	0.720657	NA
CR3882194	Myeloid	1.05068	0.720657	NA
AL66283413	Myeloid	1.05068	0.720657	NA
LHX3	Fibroblast	1.04175	0.716857	0.319874
NKX22	Cardiomyocyte	1.03031	0.714357	NA
DLX6	Fibroblast	1.07815	0.714257	-0.183453
FOXP2	Endothelial	1.04248	0.707357	0.342983
FOXF1	Pericyte	1.04424	0.698657	0.31424
REL	Myeloid	1.04122	0.692357	0.405152
DMBX1	Fibroblast	1.06781	0.684957	-0.00712829
GABPA	Smooth Muscle	1.19631	0.684057	0.231164
RFX2	Pericyte	1.05845	0.682257	-0.217919
NR2F6	Endothelial	1.05178	0.681057	0.15455
VAX1	Fibroblast	1.06488	0.679857	-0.286443
VAX2	Fibroblast	1.06488	0.679857	0.53032
OTP	Fibroblast	1.05767	0.679657	-0.0337808
LYL1	Neuronal	1.07115	0.677357	-0.614063
NHLH1	Neuronal	1.07115	0.677357	0.230306
FOXI1	Pericyte	1.03766	0.676957	-0.366986
DNMT1	Smooth Muscle	1.18033	0.673357	0.602282
SOX8	Neuronal	1.09855	0.673257	-0.355517
FOXS1	Fibroblast	1.03071	0.672257	0.525472
RUNX2	Fibroblast	1.02831	0.671357	0.304743
ENSG00000250096	Fibroblast	1.02831	0.671357	NA
NR1D2	Smooth Muscle	1.1971	0.665157	0.152218
AIRE	Fibroblast	1.04288	0.661657	-0.0935381
PBX4	Lymphoid	1.09305	0.657757	0.557453
ZNF524	Endothelial	1.05312	0.655957	-0.00428489
BRCA1	Fibroblast	1.04238	0.654757	0.211788
ZNF143	Neuronal	1.08932	0.654757	0.33632
PROP1	Fibroblast	1.04537	0.654057	0.0366382
MAFA	Smooth Muscle	1.12075	0.653457	0.237931
ZNF354C	Fibroblast	1.02158	0.651557	-0.00930946
NR6A1	Myeloid	1.03701	0.650057	0.779613
ELK1	Pericyte	1.08529	0.633957	0.00499638
ETS1	Smooth Muscle	1.22838	0.632657	0.572741
MAFB	Pericyte	1.05729	0.630957	0.220513
ZIC3	Neuronal	1.09025	0.622257	-0.185573
PAX8	Fibroblast	1.05613	0.619857	-0.198597
E2F8	Endothelial	1.05576	0.619057	-0.887172
MNX1	Fibroblast	1.04185	0.615757	0.0772623
SOX14	Fibroblast	1.04782	0.615257	0.103692
HLTF	Endothelial	1.04006	0.613757	-0.369634
ID1	Smooth Muscle	1.27637	0.610157	-0.666855
ID2	Smooth Muscle	1.27637	0.610157	-0.381272
XBP1	Cardiomyocyte	1.05069	0.609757	0.21177
ARNT	Lymphoid	1.16488	0.608557	0.0547266
BARX2	Fibroblast	1.04342	0.603557	-0.10228
NFYA	Neuronal	1.10606	0.603257	0.143738
GATA3	Fibroblast	1.04707	0.600357	-0.0666435
POU4F2	Fibroblast	1.03414	0.595057	-0.127496
GMEB1	Pericyte	1.18524	0.590257	0.103698
ZBTB6	Pericyte	1.05447	0.589357	-0.141442
OTX2	Fibroblast	1.06926	0.578957	-0.316938
GLI1	Neuronal	1.07304	0.578857	-0.0120825
TEAD3	Fibroblast	1.03929	0.572257	0.325828
ARID2	Smooth Muscle	1.23313	0.565557	0.0526933
HSF1	Neuronal	1.08728	0.561857	-0.627431
BCL6B	Pericyte	1.05255	0.560357	0.745969
TLX1	Smooth Muscle	1.19795	0.558157	0.00452918
TLX3	Smooth Muscle	1.19795	0.558157	0.0544618
GFI1B	Neuronal	1.0806	0.557657	-0.646424
ZIC1	Smooth Muscle	1.19292	0.550357	-0.358286
ZNF691	Endothelial	1.05935	0.550257	0.150176
ESR1	Pericyte	1.0451	0.548357	-0.508054
NEUROG3	Pericyte	1.08873	0.548257	-0.221163
ZNF75A	Endothelial	1.0369	0.543557	-0.342711
ZNF75D	Endothelial	1.0369	0.543557	0.175115
LINE4118	Endothelial	1.0369	0.543557	NA
PAX5	Endothelial	1.05398	0.540857	0.297336
GCM2	Smooth Muscle	1.34651	0.537557	-0.613191
ZBTB4	Smooth Muscle	1.2092	0.537257	0.264509
THAP1	Endothelial	1.04107	0.531257	0.000993508
USF1	Pericyte	1.06164	0.528357	0.24472
NR1H3	Cardiomyocyte	1.02786	0.526557	-0.176404
NR1H2	Cardiomyocyte	1.02786	0.526557	0.512962
ID1	Myeloid	1.06185	0.524457	-0.666855
ID2	Myeloid	1.06185	0.524457	-0.381272
FOXM1	Myeloid	1.02276	0.523557	0.315567
KLF3	Fibroblast	1.03024	0.523457	0.574959
E2F8	Neuronal	1.09272	0.522357	-0.887172
NKX11	Fibroblast	1.05699	0.521857	NA
KLF3	Cardiomyocyte	1.02105	0.519157	0.574959
JUN	Smooth Muscle	1.12675	0.516757	0.0333374
CBFB	Fibroblast	1.03008	0.512457	0.136428
LMX1A	Fibroblast	1.05441	0.511257	0.142439
NKX21	Smooth Muscle	1.14622	0.504657	NA
FLI1	Smooth Muscle	1.21608	0.498757	0.707522
HBP1	Myeloid	1.0437	0.498357	-0.0547905
CXXC1	Lymphoid	1.17767	0.497057	0.505036
EMX2	Fibroblast	1.06664	0.496657	-0.354252
NR1H4	Neuronal	1.09058	0.494657	-0.565782
GCM2	Cardiomyocyte	1.05499	0.493757	-0.613191
HOXB1	Pericyte	1.06689	0.491657	-0.389476
HBP1	Neuronal	1.09824	0.490657	-0.0547905
FOXI2	Pericyte	1.03462	0.488857	0.206133
EGR1	Pericyte	1.0384	0.485657	0.815398
ATF3	Cardiomyocyte	1.03689	0.484357	0.364066
PAX8	Neuronal	1.11651	0.480057	-0.198597
T	Cardiomyocyte	1.03126	0.478657	NA
MAFB	Lymphoid	1.0721	0.478457	0.220513
NFE2L2	Smooth Muscle	1.12219	0.474657	0.433362
TFEB	Smooth Muscle	1.20714	0.473557	0.125409
ELK3	Smooth Muscle	1.23865	0.472357	0.316695
ELF1	Smooth Muscle	1.14073	0.470657	0.264329
NFATC2	Neuronal	1.06175	0.468457	-0.4042
SMAD1	Endothelial	1.0288	0.464557	-0.390738
ELK1	Smooth Muscle	1.23179	0.464257	0.00499638
SOX7	Endothelial	1.04867	0.463557	0.740144
EGR3	Smooth Muscle	1.21835	0.452457	0.476249
IRF7	Pericyte	1.04576	0.448957	0.534896
PRKRIR	Pericyte	1.07156	0.448257	NA
[truncated: 4,966 more rows]

## Sheet: Supplementary Data 3
Supplementary Data 3. Results of SNP fine-mapping analysis, and gene mapping.
Each row shows fine-mapping results of one SNP, as well as a gene supported by that SNP. Note that a SNP may occur in multiple rows, if that SNP potentially affect multiple genes.
"PIP": fine-mapping PIPs using informative prior in the "Prior" column. "PIP (uniform prior)": PIP results using uniform prior. "Gene Linked": genes linked to the SNPs (through the links specified in the "Link Method").
"Fractional PIP": PIP of a SNP x fraction of that PIP assigned to the gene in the "Gene Linked" column. The last five columns show additional evidences/annotations for the SNPs.
Only the SNP-gene pairs with "Fractional PIP" > 0.02 are shown in this table.
SNP	chr	b37 bp	A1	A2	locus	PIP	Prior	PIP (uniform prior)	neg. log10-pval	Chromatin Status	Nearest Gene	Gene Linked	Link Method	Gene PIP	Fractional PIP	Distance to Gene	AdultHeart H3K27ac	FetalHeart DNase	FGT ChIP	eQTL Symbols	motif break (strong)
rs284279	1	10789697	T	C	7	0.027	1.94e-05	0.125	8.719	Unannotated	CASZ1	CASZ1	pcHiC	0.882	0.027	67010	chr1:10772434-10790079	NA	NA	NA	NA
rs284278	1	10790536	A	G	7	0.053	1.94e-05	0.245	8.852	Unannotated	CASZ1	CASZ1	pcHiC	0.882	0.053	66171	chr1:10790382-10792215	NA	NA	NA	NA
rs284277	1	10790797	C	A	7	0.063	1.94e-05	0.293	8.905	Unannotated	CASZ1	CASZ1	pcHiC	0.882	0.063	65910	chr1:10790382-10792215	NA	NA	NA	NA
rs880315	1	10796866	C	T	7	0.731	0.00079	0.083	8.501	CM specific ATAC	CASZ1	CASZ1	distance	0.882	0.655	59841	chr1:10792338-10800701	chr1:10796661-10797819	NA	NA	NA
rs11121609	1	10802468	T	C	7	0.039	0.000529	0.007	7.247	CM non-DA ATAC	CASZ1	CASZ1	distance	0.882	0.036	54239	chr1:10801910-10809142	NA	NA	NA	NA
rs7529220	1	22282619	T	C	15	0.908	0.000529	0.574	9.703	CM non-DA ATAC	HSPG2	HSPG2	nearby20kb	0.495	0.454	18829	chr1:22281231-22284962	NA	NA	NA	NA
rs7529220	1	22282619	T	C	15	0.908	0.000529	0.574	9.703	CM non-DA ATAC	HSPG2	CELA3B	nearby20kb	0.486	0.454	20895	chr1:22281231-22284962	NA	NA	NA	NA
rs2885697	1	41544279	G	T	25	0.981	1.94e-05	0.986	9.54	Unannotated	SLFNL1	CTPS1	distance	0.259	0.256	99272	NA	NA	NA	NA	NA
rs2885697	1	41544279	G	T	25	0.981	1.94e-05	0.986	9.54	Unannotated	SLFNL1	CITED4	distance	0.025	0.025	216261	NA	NA	NA	NA	NA
rs2885697	1	41544279	G	T	25	0.981	1.94e-05	0.986	9.54	Unannotated	SLFNL1	SLFNL1	distance	0.625	0.616	55370	NA	NA	NA	NA	NA
rs2885697	1	41544279	G	T	25	0.981	1.94e-05	0.986	9.54	Unannotated	SLFNL1	SCMH1	distance	0.075	0.071	163547	NA	NA	NA	NA	NA
rs11590635	1	49309764	A	G	31	0.973	1.94e-05	0.973	8.385	Unannotated	BEND5	BEND5	distance	0.997	0.97	67123	NA	NA	NA	NA	NA
rs72692218	1	51436946	G	A	32	0.68	0.00282	0.015	12.985	CM specific ATAC/Conserved	CDKN2C	CDKN2C	nearby20kb	0.406	0.34	10529	chr1:51431843-51438107	chr1:51436643-51436950	NA	NA	IRF1 - strong,IRF9 - strong
rs72692218	1	51436946	G	A	32	0.68	0.00282	0.015	12.985	CM specific ATAC/Conserved	CDKN2C	FAF1	nearby20kb	0.426	0.34	11011	chr1:51431843-51438107	chr1:51436643-51436950	NA	NA	IRF1 - strong,IRF9 - strong
rs146518726	1	51535039	A	G	32	0.05	1.94e-05	0.161	14.083	Unannotated	C1orf185	C1orf185	distance	0.168	0.033	32867	NA	NA	NA	NA	NA
rs72692270	1	51571017	A	C	32	0.031	1.94e-05	0.099	13.783	Unannotated	C1orf185	C1orf185	distance	0.168	0.025	3111	NA	NA	NA	NA	NA
rs76782211	1	51820415	A	G	33	0.024	6.31e-05	0.017	12.667	Coding/Conserved	TTC39A	EPS15	exons	0.38	0.024	164585	NA	NA	NA	NA	NA
rs59715648	1	51876499	C	T	33	0.035	0.000529	0.003	11.867	CM non-DA ATAC	TTC39A	TTC39A	distance	0.448	0.021	65711	chr1:51875657-51877303	chr1:51876259-51877132	NA	NA	NA
rs60782272	1	51876749	T	C	33	0.035	0.000529	0.003	11.868	CM non-DA ATAC	TTC39A	TTC39A	distance	0.448	0.021	65961	chr1:51875657-51877303	chr1:51876259-51877132	NA	NA	NA
rs72694198	1	51876782	C	T	33	0.132	0.000529	0.011	12.468	CM non-DA ATAC	TTC39A	TTC39A	distance	0.448	0.078	65994	chr1:51875657-51877303	chr1:51876259-51877132	NA	NA	NA
rs72694198	1	51876782	C	T	33	0.132	0.000529	0.011	12.468	CM non-DA ATAC	TTC39A	EPS15	distance	0.38	0.034	108218	chr1:51875657-51877303	chr1:51876259-51877132	NA	NA	NA
rs72696107	1	51889202	A	C	33	0.054	0.00079	0.003	11.885	CM specific ATAC	TTC39A	TTC39A	distance	0.448	0.026	78414	chr1:51887306-51890584	chr1:51888296-51889612	NA	NA	NA
rs72696108	1	51889585	G	A	33	0.235	0.00079	0.013	12.537	CM specific ATAC	TTC39A	OSBPL9	distance	0.105	0.026	153266	chr1:51887306-51890584	chr1:51888296-51889612	NA	NA	NA
rs72696108	1	51889585	G	A	33	0.235	0.00079	0.013	12.537	CM specific ATAC	TTC39A	TTC39A	distance	0.448	0.114	78797	chr1:51887306-51890584	chr1:51888296-51889612	NA	NA	NA
rs72696108	1	51889585	G	A	33	0.235	0.00079	0.013	12.537	CM specific ATAC	TTC39A	EPS15	distance	0.38	0.082	95415	chr1:51887306-51890584	chr1:51888296-51889612	NA	NA	NA
rs56157924	1	51989746	T	C	33	0.044	0.000139	0.014	12.523	Conserved/Non-CM ATAC	EPS15	EPS15	nearby20kb	0.38	0.022	4746	NA	NA	NA	NA	NA
rs56157924	1	51989746	T	C	33	0.044	0.000139	0.014	12.523	Conserved/Non-CM ATAC	EPS15	TTC39A	pcHiC	0.448	0.022	178958	NA	NA	NA	NA	NA
rs2120436	1	112451447	T	C	69	0.055	1.94e-05	0.056	13.21	Unannotated	KCND3	KCND3	distance	0.736	0.037	80330	NA	NA	NA	KCND3	NA
rs12090194	1	112454822	T	C	69	0.132	1.94e-05	0.134	13.439	Unannotated	KCND3	KCND3	distance	0.736	0.093	76955	NA	NA	NA	KCND3	NA
rs72692596	1	112455415	T	C	69	0.119	1.94e-05	0.121	13.372	Unannotated	KCND3	KCND3	distance	0.736	0.084	76362	NA	NA	NA	KCND3	NA
rs72692602	1	112458833	C	T	69	0.2	1.94e-05	0.203	13.633	Unannotated	KCND3	DDX20	distance	0.128	0.025	160966	NA	NA	NA	KCND3	NA
rs72692602	1	112458833	C	T	69	0.2	1.94e-05	0.203	13.633	Unannotated	KCND3	FAM212B	distance	0.13	0.026	160387	NA	NA	NA	KCND3	NA
rs72692602	1	112458833	C	T	69	0.2	1.94e-05	0.203	13.633	Unannotated	KCND3	KCND3	distance	0.736	0.148	72944	NA	NA	NA	KCND3	NA
rs72694603	1	112458893	T	C	69	0.222	1.94e-05	0.226	13.646	Unannotated	KCND3	DDX20	distance	0.128	0.028	161026	NA	NA	NA	KCND3	NA
rs72694603	1	112458893	T	C	69	0.222	1.94e-05	0.226	13.646	Unannotated	KCND3	FAM212B	distance	0.13	0.028	160447	NA	NA	NA	KCND3	NA
rs72694603	1	112458893	T	C	69	0.222	1.94e-05	0.226	13.646	Unannotated	KCND3	KCND3	distance	0.736	0.164	72884	NA	NA	NA	KCND3	NA
rs4839185	1	112460262	C	T	69	0.035	1.94e-05	0.035	12.961	Unannotated	KCND3	KCND3	distance	0.736	0.026	71515	NA	NA	NA	KCND3	NA
rs1443926	1	112461902	G	A	69	0.052	1.94e-05	0.053	13.138	Unannotated	KCND3	KCND3	distance	0.736	0.04	69875	chr1:112461499-112465273	NA	NA	KCND3	NA
rs1545300	1	112464004	T	C	69	0.168	1.94e-05	0.171	13.829	Unannotated	KCND3	KCND3	distance	0.736	0.131	67773	chr1:112461499-112465273	NA	NA	NA	NA
rs12144451	1	116291729	C	T	72	0.054	0.00079	0.032	11.109	CM specific ATAC	CASQ2	CASQ2	nearby20kb	0.583	0.054	19673	chr1:116290723-116303355	chr1:116291640-116291757	NA	CASQ2	NA
rs4073778	1	116297758	C	A	72	0.719	0.00079	0.423	12.305	CM specific ATAC	CASQ2	CASQ2	nearby20kb	0.583	0.36	13644	chr1:116290723-116303355	NA	NA	CASQ2	IRF1 - strong
rs4073778	1	116297758	C	A	72	0.719	0.00079	0.423	12.305	CM specific ATAC	CASQ2	VANGL1	pcHiC	0.388	0.36	113184	chr1:116290723-116303355	NA	NA	CASQ2	IRF1 - strong
rs9428221	1	116300137	G	A	72	0.079	0.00282	0.013	10.868	CM specific ATAC/Conserved	CASQ2	CASQ2	nearby20kb	0.583	0.079	11265	chr1:116290723-116303355	chr1:116300000-116300321	NA	CASQ2	NA
rs79187193	1	147255831	A	G	74	0.027	1.94e-05	0.058	13.502	Unannotated	GJA5	GJA5	pcHiC	0.802	0.027	10347	NA	NA	NA	NA	NA
rs75523969	1	147266890	G	A	74	0.065	0.000329	0.008	12.712	CM shared ATAC	GJA5	GJA5	nearby20kb,pcHiC	0.802	0.065	21406	NA	chr1:147266676-147267002	NA	NA	NA
rs77459137	1	147280333	A	G	74	0.215	0.000529	0.017	13.016	CM non-DA ATAC	GJA5	GJA5	pcHiC	0.802	0.215	34849	NA	NA	NA	NA	NA
rs76035254	1	147293251	T	C	74	0.114	0.00079	0.006	12.54	CM specific ATAC	GJA5	GJA8	distance	0.103	0.03	81695	chr1:147292703-147295266	NA	NA	NA	NA
rs76035254	1	147293251	T	C	74	0.114	0.00079	0.006	12.54	CM specific ATAC	GJA5	GJA5	distance	0.802	0.058	47767	chr1:147292703-147295266	NA	NA	NA	NA
rs79157808	1	147293292	C	T	74	0.114	0.00079	0.006	12.539	CM specific ATAC	GJA5	GJA8	distance	0.103	0.03	81654	chr1:147292703-147295266	NA	NA	NA	NA
rs79157808	1	147293292	C	T	74	0.114	0.00079	0.006	12.539	CM specific ATAC	GJA5	GJA5	distance	0.802	0.058	47808	chr1:147292703-147295266	NA	NA	NA	NA
rs75663428	1	147294870	T	C	74	0.022	0.00079	0.001	11.776	CM specific ATAC	GJA5	GJA5	pcHiC	0.802	0.022	49386	chr1:147292703-147295266	NA	NA	NA	NA
rs79487014	1	147294871	T	C	74	0.022	0.00079	0.001	11.772	CM specific ATAC	GJA5	GJA5	pcHiC	0.802	0.022	49387	chr1:147292703-147295266	NA	NA	NA	NA
rs4999127	1	154714006	G	A	77	0.989	0.000139	0.95	16.369	Conserved/Non-CM ATAC	ADAR	CHRNB2	pcHiC	0.83	0.495	173749	chr1:154713539-154715233	NA	NA	NA	NA
rs4999127	1	154714006	G	A	77	0.989	0.000139	0.95	16.369	Conserved/Non-CM ATAC	ADAR	KCNN3	pcHiC	0.837	0.495	128750	chr1:154713539-154715233	NA	NA	NA	NA
rs11264280	1	154862952	T	C	78	1	1.94e-05	1	78.513	Unannotated	KCNN3	UBE2Q1	pcHiC	0.333	0.333	331448	NA	NA	NA	NA	NA
rs11264280	1	154862952	T	C	78	1	1.94e-05	1	78.513	Unannotated	KCNN3	CHRNB2	pcHiC	0.83	0.333	322695	NA	NA	NA	NA	NA
rs11264280	1	154862952	T	C	78	1	1.94e-05	1	78.513	Unannotated	KCNN3	KCNN3	pcHiC	0.837	0.333	20196	NA	NA	NA	NA	NA
rs113116849	1	170176759	A	G	85	0.048	1.94e-05	0.092	32.553	Unannotated	METTL11B	METTL11B	distance	0.761	0.036	61617	NA	NA	NA	NA	NA
rs12144090	1	170182246	G	A	85	0.029	1.94e-05	0.055	32.368	Unannotated	METTL11B	METTL11B	distance	0.761	0.022	67104	NA	NA	NA	NA	NA
rs12142529	1	170185304	C	T	85	0.046	1.94e-05	0.088	32.537	Unannotated	METTL11B	METTL11B	distance	0.761	0.035	70162	NA	NA	NA	NA	NA
rs12116424	1	170186354	A	G	85	0.046	1.94e-05	0.088	32.542	Unannotated	METTL11B	METTL11B	distance	0.761	0.035	71212	NA	NA	NA	NA	NA
rs12145587	1	170188108	C	T	85	0.036	1.94e-05	0.07	32.457	Unannotated	METTL11B	METTL11B	distance	0.761	0.027	72966	NA	NA	NA	NA	NA
rs12120404	1	170189808	T	G	85	0.058	1.94e-05	0.112	32.652	Unannotated	METTL11B	METTL11B	distance	0.761	0.044	74666	NA	NA	NA	NA	NA
rs12131240	1	170192670	T	C	85	0.052	1.94e-05	0.099	32.607	Unannotated	METTL11B	METTL11B	distance	0.761	0.039	77528	NA	NA	NA	NA	NA
rs72700118	1	170194823	A	C	85	0.605	6.95e-05	0.327	33.021	Conserved	METTL11B	METTL11B	distance	0.761	0.46	79681	NA	NA	NA	NA	NA
rs72700118	1	170194823	A	C	85	0.605	6.95e-05	0.327	33.021	Conserved	METTL11B	KIFAP3	distance	0.225	0.136	140474	NA	NA	NA	NA	NA
rs72700121	1	170195607	G	A	85	0.064	6.95e-05	0.035	32.453	Conserved	METTL11B	METTL11B	distance	0.761	0.049	80465	NA	NA	NA	NA	NA
rs577676	1	170587340	T	C	86	0.885	6.95e-05	0.757	42.791	Conserved	PRRX1	GORAB	distance	0.286	0.268	86070	NA	NA	NA	PRRX1	NA
rs577676	1	170587340	T	C	86	0.885	6.95e-05	0.757	42.791	Conserved	PRRX1	PRRX1	distance	0.719	0.614	44529	NA	NA	NA	PRRX1	NA
rs680084	1	170628255	G	A	86	0.035	6.95e-05	0.03	41.481	Conserved	PRRX1	PRRX1	distance	0.719	0.032	3614	NA	NA	NA	PRRX1	NA
rs10753933	1	203026214	T	G	104	0.091	1.94e-05	0.337	19.007	Unannotated	MYOG	CHI3L1	pcHiC	0.349	0.091	129663	NA	chr1:203026105-203026375	NA	NA	NA
rs7538696	1	203034309	G	A	104	0.036	1.94e-05	0.133	18.733	Unannotated	MYOG	CHI3L1	pcHiC	0.349	0.036	121568	NA	NA	NA	NA	NA
rs3737883	1	203034906	A	G	104	0.749	0.00079	0.069	18.462	CM specific ATAC	MYOG	MYOG	nearby20kb,pcHiC	0.223	0.187	20258	chr1:203034523-203035763	NA	NA	ADORA1	NA
rs3737883	1	203034906	A	G	104	0.749	0.00079	0.069	18.462	CM specific ATAC	MYOG	PPFIA4	pcHiC	0.213	0.187	39280	chr1:203034523-203035763	NA	NA	ADORA1	NA
rs3737883	1	203034906	A	G	104	0.749	0.00079	0.069	18.462	CM specific ATAC	MYOG	MYBPH	pcHiC	0.204	0.187	110035	chr1:203034523-203035763	NA	NA	ADORA1	NA
rs3737883	1	203034906	A	G	104	0.749	0.00079	0.069	18.462	CM specific ATAC	MYOG	CHI3L1	pcHiC	0.349	0.187	120971	chr1:203034523-203035763	NA	NA	ADORA1	NA
rs951366	1	205685352	C	T	106	0.133	6.31e-05	0.23	7.62	Coding/Conserved	AC119673.1	NUCKS1	exons	0.554	0.133	34052	NA	NA	NA	NUCKS1;RAB7L1;PM20D1	NA
rs4951261	1	205717823	C	A	106	0.694	0.000329	0.23	7.656	CM shared ATAC	NUCKS1	NUCKS1	nearby20kb	0.554	0.347	1581	chr1:205716917-205720173	chr1:205717610-205720098	NA	NUCKS1;RAB7L1;PM20D1	NA
rs4951261	1	205717823	C	A	106	0.694	0.000329	0.23	7.656	CM shared ATAC	NUCKS1	SLC26A9	pcHiC	0.348	0.347	194765	chr1:205716917-205720173	chr1:205717610-205720098	NA	NUCKS1;RAB7L1;PM20D1	NA
rs823114	1	205719532	G	A	106	0.039	0.00117	0.004	5.711	CM shared ATAC/Conserved	NUCKS1	NUCKS1	active.promoters	0.554	0.039	128	chr1:205716917-205720173	chr1:205717610-205720098	chr1:205719348-205719702	NUCKS1;RAB7L1;PM20D1	NA
rs6546620	2	26159940	T	C	148	0.976	0.00079	0.505	11.497	CM specific ATAC	KIF3C	RAB10	distance	0.139	0.136	97036	chr2:26159365-26162815	NA	NA	NA	MEIS2 - strong,TCF4 - strong
rs6546620	2	26159940	T	C	148	0.976	0.00079	0.505	11.497	CM specific ATAC	KIF3C	ASXL2	distance	0.299	0.293	58555	chr2:26159365-26162815	NA	NA	NA	MEIS2 - strong,TCF4 - strong
rs6546620	2	26159940	T	C	148	0.976	0.00079	0.505	11.497	CM specific ATAC	KIF3C	KIF3C	distance	0.388	0.379	45678	chr2:26159365-26162815	NA	NA	NA	MEIS2 - strong,TCF4 - strong
rs6546620	2	26159940	T	C	148	0.976	0.00079	0.505	11.497	CM specific ATAC	KIF3C	AC013449.1	distance	0.155	0.151	91541	chr2:26159365-26162815	NA	NA	NA	MEIS2 - strong,TCF4 - strong
rs12998475	2	61437487	C	T	173	0.047	0.000329	0.005	7.41	CM shared ATAC	AHSA2	AHSA2	distance	0.108	0.027	32934	NA	NA	NA	C2orf74;AHSA2	NA
rs1186700	2	61663372	A	C	173	0.086	0.000329	0.009	7.706	CM shared ATAC	USP34	USP34	distance	0.626	0.067	34532	chr2:61662684-61663921	NA	NA	C2orf74;AHSA2	NA
rs2421203	2	61669248	C	A	173	0.191	0.00079	0.008	7.692	CM specific ATAC	USP34	USP34	pcHiC	0.626	0.191	28656	NA	chr2:61669150-61669261	NA	C2orf74;AHSA2	NA
rs1009358	2	65276452	C	T	175	0.197	1.94e-05	0.197	20.569	Unannotated	CEP68	SLC1A4	distance	0.199	0.042	60841	NA	NA	NA	CEP68	MEF2D - strong
rs1009358	2	65276452	C	T	175	0.197	1.94e-05	0.197	20.569	Unannotated	CEP68	CEP68	distance	0.631	0.123	7048	NA	NA	NA	CEP68	MEF2D - strong
rs1009358	2	65276452	C	T	175	0.197	1.94e-05	0.197	20.569	Unannotated	CEP68	RAB1A	distance	0.147	0.028	80788	NA	NA	NA	CEP68	MEF2D - strong
rs2540951	2	65276736	G	A	175	0.227	1.94e-05	0.227	20.625	Unannotated	CEP68	SLC1A4	distance	0.199	0.048	61125	NA	NA	NA	CEP68	NA
rs2540951	2	65276736	G	A	175	0.227	1.94e-05	0.227	20.625	Unannotated	CEP68	CEP68	distance	0.631	0.141	6764	NA	NA	NA	CEP68	NA
rs2540951	2	65276736	G	A	175	0.227	1.94e-05	0.227	20.625	Unannotated	CEP68	RAB1A	distance	0.147	0.032	80504	NA	NA	NA	CEP68	NA
rs2723065	2	65279414	G	A	175	0.227	1.94e-05	0.227	20.672	Unannotated	CEP68	SLC1A4	distance	0.199	0.044	63803	NA	NA	NA	CEP68	NA
rs2723065	2	65279414	G	A	175	0.227	1.94e-05	0.227	20.672	Unannotated	CEP68	CEP68	distance	0.631	0.145	4086	NA	NA	NA	CEP68	NA
rs2723065	2	65279414	G	A	175	0.227	1.94e-05	0.227	20.672	Unannotated	CEP68	RAB1A	distance	0.147	0.033	77826	NA	NA	NA	CEP68	NA
rs2723064	2	65279805	C	T	175	0.343	1.94e-05	0.344	20.844	Unannotated	CEP68	SLC1A4	distance	0.199	0.066	64194	NA	NA	NA	CEP68	NA
rs2723064	2	65279805	C	T	175	0.343	1.94e-05	0.344	20.844	Unannotated	CEP68	CEP68	distance	0.631	0.22	3695	NA	NA	NA	CEP68	NA
rs2723064	2	65279805	C	T	175	0.343	1.94e-05	0.344	20.844	Unannotated	CEP68	RAB1A	distance	0.147	0.05	77435	NA	NA	NA	CEP68	NA
rs3771537	2	70038792	C	A	179	0.062	1.94e-05	0.067	14.844	Unannotated	GMCL1	GMCL1	distance	0.495	0.031	17982	NA	NA	NA	GMCL1;SNRNP27	NA
rs10865380	2	70091246	C	T	179	0.113	1.94e-05	0.122	15.172	Unannotated	SNRNP27	SNRNP27	pcHiC	0.184	0.113	29446	NA	NA	NA	GMCL1;SNRNP27	NA
rs57278310	2	70093647	C	T	179	0.1	1.94e-05	0.108	15.118	Unannotated	SNRNP27	C2orf42	pcHiC	0.107	0.1	382100	NA	NA	NA	GMCL1;SNRNP27	NA
rs60207187	2	70093910	A	G	179	0.128	1.94e-05	0.138	15.224	Unannotated	SNRNP27	GMCL1	distance	0.495	0.027	37136	NA	NA	NA	GMCL1;SNRNP27	NA
rs60207187	2	70093910	A	G	179	0.128	1.94e-05	0.138	15.224	Unannotated	SNRNP27	SNRNP27	distance	0.184	0.033	26782	NA	NA	NA	GMCL1;SNRNP27	NA
rs60207187	2	70093910	A	G	179	0.128	1.94e-05	0.138	15.224	Unannotated	SNRNP27	MXD1	distance	0.066	0.03	30910	NA	NA	NA	GMCL1;SNRNP27	NA
rs60207187	2	70093910	A	G	179	0.128	1.94e-05	0.138	15.224	Unannotated	SNRNP27	AC019206.1	distance	0.062	0.027	35931	NA	NA	NA	GMCL1;SNRNP27	NA
rs6747542	2	70106832	C	T	179	0.371	1.94e-05	0.401	15.96	Unannotated	SNRNP27	GMCL1	exons	0.495	0.371	50058	NA	NA	NA	GMCL1;SNRNP27	EOMES - strong,NFATC1 - strong
rs55945133	2	86571667	T	C	187	0.033	1.94e-05	0.055	9.936	Unannotated	REEP1	REEP1	distance	0.504	0.025	6461	NA	NA	NA	NA	NA
rs112759859	2	86573668	T	C	187	0.033	1.94e-05	0.055	9.937	Unannotated	REEP1	REEP1	distance	0.504	0.025	8462	NA	NA	NA	NA	NA
rs55896146	2	86574514	T	C	187	0.031	1.94e-05	0.051	9.919	Unannotated	REEP1	REEP1	distance	0.504	0.023	9308	NA	NA	NA	NA	NA
rs72926457	2	86576428	A	G	187	0.031	1.94e-05	0.051	9.916	Unannotated	REEP1	REEP1	distance	0.504	0.023	11222	NA	NA	NA	NA	NA
rs17027163	2	86588234	T	C	187	0.033	1.94e-05	0.054	9.835	Unannotated	REEP1	REEP1	distance	0.504	0.022	23028	NA	NA	NA	NA	NA
rs6728272	2	86590360	A	G	187	0.025	1.94e-05	0.042	9.72	Unannotated	REEP1	REEP1	pcHiC	0.504	0.025	25154	NA	NA	NA	NA	NA
rs72926475	2	86594487	A	G	187	0.173	1.94e-05	0.287	10.625	Unannotated	REEP1	IMMT	pcHiC	0.089	0.043	171594	NA	NA	NA	NA	NA
rs72926475	2	86594487	A	G	187	0.173	1.94e-05	0.287	10.625	Unannotated	REEP1	MRPL35	pcHiC	0.079	0.043	168009	NA	NA	NA	NA	NA
rs72926475	2	86594487	A	G	187	0.173	1.94e-05	0.287	10.625	Unannotated	REEP1	REEP1	pcHiC	0.504	0.043	29281	NA	NA	NA	NA	NA
rs72926475	2	86594487	A	G	187	0.173	1.94e-05	0.287	10.625	Unannotated	REEP1	KDM3A	pcHiC	0.297	0.043	73283	NA	NA	NA	NA	NA
rs75610186	2	86600056	T	G	187	0.419	0.000329	0.041	9.829	CM shared ATAC	REEP1	KDM3A	distance	0.297	0.129	67714	NA	NA	NA	NA	NA
rs75610186	2	86600056	T	G	187	0.419	0.000329	0.041	9.829	CM shared ATAC	REEP1	REEP1	distance	0.504	0.25	34850	NA	NA	NA	NA	NA
rs56194753	2	86640233	G	A	187	0.071	1.94e-05	0.118	10.199	Unannotated	KDM3A	KDM3A	distance	0.297	0.048	27537	NA	NA	NA	NA	NA
rs4663039	2	127423075	A	G	207	0.062	1.94e-05	0.073	9.686	Unannotated	GYPC	GYPC	distance	0.985	0.062	9566	chr2:127422928-127424943	NA	NA	GYPC	NA
rs28387111	2	127424539	T	C	207	0.04	1.94e-05	0.047	9.629	Unannotated	GYPC	GYPC	distance	0.985	0.039	11030	chr2:127422928-127424943	NA	NA	GYPC	NA
rs28387129	2	127427673	T	C	207	0.153	3.9e-05	0.089	9.832	Non-CM ATAC	GYPC	GYPC	nearby20kb	0.985	0.153	14164	chr2:127425671-127428874	NA	NA	GYPC	NA
rs28387148	2	127433465	T	C	207	0.191	1.94e-05	0.224	10.204	Unannotated	GYPC	GYPC	distance	0.985	0.187	19956	NA	NA	NA	GYPC	EOMES - strong
rs28387149	2	127433614	T	C	207	0.103	1.94e-05	0.121	9.922	Unannotated	GYPC	GYPC	distance	0.985	0.101	20105	NA	NA	NA	GYPC	NA
rs28387150	2	127433966	T	G	207	0.097	1.94e-05	0.114	9.912	Unannotated	GYPC	GYPC	distance	0.985	0.095	20457	NA	NA	NA	GYPC	NA
rs28387153	2	127434446	G	A	207	0.144	3.9e-05	0.085	9.89	Non-CM ATAC	GYPC	GYPC	distance	0.985	0.142	20937	NA	NA	NA	GYPC	NA
rs113949548	2	127437364	T	C	207	0.09	1.94e-05	0.105	9.961	Unannotated	GYPC	GYPC	distance	0.985	0.088	23855	NA	NA	NA	GYPC	NA
rs28387166	2	127437880	T	C	207	0.058	1.94e-05	0.068	9.762	Unannotated	GYPC	GYPC	distance	0.985	0.057	24371	NA	NA	NA	GYPC	NA
rs28387167	2	127437904	T	C	207	0.061	1.94e-05	0.072	9.771	Unannotated	GYPC	GYPC	distance	0.985	0.06	24395	NA	NA	NA	GYPC	NA
rs10496971	2	145769943	G	T	219	0.896	0.00282	0.077	7.607	CM specific ATAC/Conserved	ZEB2	ZEB2	distance	0.979	0.877	487796	chr2:145769620-145770395	chr2:145769747-145770358	NA	NA	FOXJ3 - strong
rs35215597	2	175543782	G	A	238	0.874	0.000529	0.203	16.681	CM non-DA ATAC	WIPF1	WIPF1	nearby20kb	0.971	0.874	3862	NA	NA	NA	WIPF1	NA
rs56181519	2	175555714	T	C	238	0.119	1.94e-05	0.754	17.19	Unannotated	WIPF1	WIPF1	distance	0.971	0.092	8070	NA	NA	NA	WIPF1	NA
rs56181519	2	175555714	T	C	238	0.119	1.94e-05	0.754	17.19	Unannotated	WIPF1	CHRNA1	distance	0.026	0.025	73486	NA	NA	NA	WIPF1	NA
rs3829748	2	179396354	A	G	241	0.564	0.00256	0.052	23.155	CM specific ATAC/Coding/Conserved	PLEKHA3	TTN	exons	0.839	0.564	299175	NA	NA	NA	NA	NA
rs3829747	2	179397561	T	C	241	0.156	0.00256	0.014	22.822	CM specific ATAC/Coding/Conserved	PLEKHA3	TTN	exons	0.839	0.156	297968	NA	chr2:179397496-179397581	NA	NA	NA
rs2857265	2	179398823	A	G	241	0.021	6.31e-05	0.08	23.34	Coding/Conserved	PLEKHA3	TTN	exons	0.839	0.021	296706	NA	NA	NA	NA	NA
rs3731746	2	179430997	A	G	241	0.032	6.31e-05	0.121	23.674	Coding/Conserved	PLEKHA3	TTN	exons	0.839	0.032	264532	NA	NA	NA	NA	NA
rs744426	2	179436020	A	G	241	0.045	0.00256	0.004	22.218	CM specific ATAC/Coding/Conserved	PLEKHA3	TTN	exons	0.839	0.045	259509	NA	NA	NA	NA	NA
rs2288571	2	179444137	G	A	241	0.078	0.000529	0.035	23.233	CM non-DA ATAC	PLEKHA3	PLEKHA3	distance	0.052	0.025	98942	NA	NA	NA	FKBP7	NA
rs2288571	2	179444137	G	A	241	0.078	0.000529	0.035	23.233	CM non-DA ATAC	PLEKHA3	FKBP7	distance	0.05	0.024	100810	NA	NA	NA	FKBP7	NA
rs56326533	2	201168758	C	T	251	0.309	1.94e-05	0.373	23.202	Unannotated	SPATS2L	TYW5	pcHiC	0.312	0.309	348299	NA	NA	NA	SPATS2L	SOX12 - strong,SOX6 - strong,SOX7 - strong,SOX9 - strong
rs67190025	2	201172086	T	C	251	0.033	0.000329	0.002	20.784	CM shared ATAC	SPATS2L	SPATS2L	distance	0.654	0.032	1482	chr2:201170226-201173679	chr2:201170592-201172446	NA	SPATS2L	NA
rs10931899	2	201176901	T	C	251	0.052	0.00079	0.002	20.774	CM specific ATAC	SPATS2L	SPATS2L	distance	0.654	0.05	6297	NA	chr2:201176639-201177023	NA	SPATS2L	NA
rs10931900	2	201177193	C	T	251	0.08	0.00079	0.002	20.969	CM specific ATAC	SPATS2L	SPATS2L	distance	0.654	0.076	6589	NA	NA	NA	SPATS2L	NA
rs3820888	2	201180023	C	T	251	0.267	1.94e-05	0.322	23.241	Unannotated	SPATS2L	SPATS2L	distance	0.654	0.254	9419	NA	NA	NA	SPATS2L	NA
rs7605146	2	201183888	A	G	251	0.231	1.94e-05	0.278	23.195	Unannotated	SPATS2L	SPATS2L	distance	0.654	0.218	13284	NA	NA	NA	SPATS2L	NA
rs35880620	2	213243651	A	G	258	0.062	1.94e-05	0.067	9.355	Unannotated	ERBB4	ERBB4	distance	1	0.062	159914	NA	NA	NA	NA	NA
rs13030181	2	213244076	T	G	258	0.062	1.94e-05	0.067	9.35	Unannotated	ERBB4	ERBB4	distance	1	0.062	159489	NA	NA	NA	NA	NA
rs1505352	2	213245395	C	T	258	0.046	1.94e-05	0.05	9.153	Unannotated	ERBB4	ERBB4	distance	1	0.046	158170	NA	NA	NA	NA	NA
rs12994366	2	213245919	T	G	258	0.053	1.94e-05	0.058	9.278	Unannotated	ERBB4	ERBB4	distance	1	0.053	157646	NA	NA	NA	NA	NA
rs12994616	2	213246079	A	G	258	0.043	1.94e-05	0.046	9.162	Unannotated	ERBB4	ERBB4	distance	1	0.043	157486	NA	NA	NA	NA	NA
rs34623832	2	213248125	C	T	258	0.057	1.94e-05	0.062	9.262	Unannotated	ERBB4	ERBB4	distance	1	0.057	155440	NA	NA	NA	NA	NA
rs13015805	2	213249244	G	A	258	0.035	1.94e-05	0.037	9.054	Unannotated	ERBB4	ERBB4	distance	1	0.035	154321	NA	NA	NA	NA	NA
rs13016554	2	213249384	A	G	258	0.043	1.94e-05	0.046	9.131	Unannotated	ERBB4	ERBB4	distance	1	0.043	154181	NA	NA	NA	NA	NA
rs1505351	2	213249549	T	C	258	0.043	1.94e-05	0.046	9.127	Unannotated	ERBB4	ERBB4	distance	1	0.043	154016	NA	NA	NA	NA	NA
rs1876047	2	213250342	C	T	258	0.066	1.94e-05	0.072	9.372	Unannotated	ERBB4	ERBB4	distance	1	0.066	153223	NA	NA	NA	NA	NA
rs13019524	2	213251503	C	T	258	0.05	1.94e-05	0.054	9.298	Unannotated	ERBB4	ERBB4	distance	1	0.05	152062	NA	NA	NA	NA	NA
rs12998688	2	213251585	T	G	258	0.083	1.94e-05	0.089	9.444	Unannotated	ERBB4	ERBB4	distance	1	0.083	151980	NA	NA	NA	NA	NA
rs13004266	2	213256200	C	T	258	0.03	1.94e-05	0.032	9.028	Unannotated	ERBB4	ERBB4	distance	1	0.03	147365	NA	NA	NA	NA	NA
rs4627509	2	213258622	C	T	258	0.057	1.94e-05	0.062	9.232	Unannotated	ERBB4	ERBB4	distance	1	0.057	144943	NA	NA	NA	NA	NA
rs6738011	2	213259857	C	T	258	0.12	1.94e-05	0.129	9.515	Unannotated	ERBB4	ERBB4	distance	1	0.12	143708	NA	NA	NA	NA	NA
rs13007162	2	213260532	A	G	258	0.049	1.94e-05	0.053	9.246	Unannotated	ERBB4	ERBB4	distance	1	0.049	143033	NA	NA	NA	NA	NA
rs1505371	2	213316540	G	A	258	0.033	0.00189	0	6.854	CM non-DA ATAC/Conserved	ERBB4	ERBB4	distance	1	0.033	87025	NA	chr2:213316487-213317035	NA	NA	NA
rs17259208	2	213316586	C	T	258	0.028	0.00189	0	6.893	CM non-DA ATAC/Conserved	ERBB4	ERBB4	distance	1	0.028	86979	NA	chr2:213316487-213317035	NA	NA	NA
rs6810325	3	12840934	T	C	286	0.4	0.00079	0.13	23.002	CM specific ATAC	CAND2	CAND2	nearby20kb	0.771	0.2	2963	chr3:12837309-12842585	NA	chr3:12840715-12841087	NA	NA
rs6810325	3	12840934	T	C	286	0.4	0.00079	0.13	23.002	CM specific ATAC	CAND2	TMEM40	pcHiC	0.214	0.2	29978	chr3:12837309-12842585	NA	chr3:12840715-12841087	NA	NA
rs7650482	3	12841804	A	G	286	0.547	0.000529	0.265	23.746	CM non-DA ATAC	CAND2	CAND2	nearby20kb	0.771	0.547	3833	chr3:12837309-12842585	chr3:12841759-12841947	NA	MKRN2	NA
rs9841040	3	24460964	G	A	295	0.13	0.00079	0.004	7.092	CM specific ATAC	THRB	THRB	distance	0.999	0.13	75809	chr3:24458779-24462225	NA	NA	NA	NA
rs73041705	3	24463235	C	T	295	0.177	1.94e-05	0.218	8.811	Unannotated	THRB	THRB	distance	0.999	0.177	73538	NA	NA	NA	THRB	NA
rs73041706	3	24463912	G	A	295	0.08	1.94e-05	0.098	8.455	Unannotated	THRB	THRB	distance	0.999	0.08	72861	NA	NA	NA	THRB	NA
rs59212267	3	24464955	A	G	295	0.087	1.94e-05	0.107	8.653	Unannotated	THRB	THRB	distance	0.999	0.087	71818	NA	NA	NA	THRB	NA
rs60325252	3	24465080	T	C	295	0.087	1.94e-05	0.107	8.649	Unannotated	THRB	THRB	distance	0.999	0.087	71693	NA	NA	NA	THRB	NA
rs73032363	3	24472866	G	A	295	0.139	1.94e-05	0.171	8.657	Unannotated	THRB	THRB	distance	0.999	0.139	63907	NA	NA	NA	THRB	NA
rs1865712	3	24474353	C	T	295	0.119	1.94e-05	0.146	8.603	Unannotated	THRB	THRB	distance	0.999	0.119	62420	NA	NA	NA	THRB	NA
rs73032373	3	24475162	C	T	295	0.074	1.94e-05	0.091	8.39	Unannotated	THRB	THRB	distance	0.999	0.074	61611	chr3:24474878-24476867	NA	NA	THRB	NA
rs9854304	3	24475752	A	G	295	0.05	0.00079	0.001	6.519	CM specific ATAC	THRB	THRB	distance	0.999	0.05	61021	chr3:24474878-24476867	chr3:24475604-24476018	NA	THRB	NA
rs116202356	3	38103776	A	G	304	0.14	1.77e-05	0.833	8.904	Coding	DLEC1	DLEC1	exons	0.14	0.14	23080	NA	NA	NA	NA	NA
rs116544863	3	38172474	T	C	304	0.85	0.00079	0.113	8.003	CM specific ATAC	ACAA1	MYD88	nearby20kb	0.425	0.425	7495	chr3:38168691-38173897	NA	NA	NA	TCF4 - strong
rs116544863	3	38172474	T	C	304	0.85	0.00079	0.113	8.003	CM specific ATAC	ACAA1	ACAA1	nearby20kb	0.425	0.425	6259	chr3:38168691-38173897	NA	NA	NA	TCF4 - strong
rs6795970	3	38766675	A	G	305	0.088	0.00048	0.091	18.77	CM non-DA ATAC/Coding	SCN10A	SCN10A	exons	0.556	0.088	68826	chr3:38763419-38768936	chr3:38766559-38766774	NA	SCN10A	NA
rs6801957	3	38767315	T	C	305	0.882	0.00282	0.154	19.163	CM specific ATAC/Conserved	SCN10A	SCN5A	distance	0.392	0.382	76151	chr3:38763419-38768936	chr3:38766897-38767718	chr3:38767241-38767441	SCN10A	NA
rs6801957	3	38767315	T	C	305	0.882	0.00282	0.154	19.163	CM specific ATAC/Conserved	SCN10A	SCN10A	distance	0.556	0.448	68186	chr3:38763419-38768936	chr3:38766897-38767718	chr3:38767241-38767441	SCN10A	NA
rs7627907	3	66426912	G	A	322	0.075	0.00079	0.003	7.525	CM specific ATAC	LRIG1	LRIG1	distance	0.982	0.073	124775	chr3:66426641-66427768	NA	NA	SLC25A26	NA
rs7630745	3	66427029	C	T	322	0.051	0.00079	0.002	7.376	CM specific ATAC	LRIG1	LRIG1	distance	0.982	0.049	124658	chr3:66426641-66427768	NA	NA	SLC25A26	NA
rs332372	3	66431532	A	G	322	0.066	1.94e-05	0.098	9.365	Unannotated	LRIG1	LRIG1	distance	0.982	0.064	120155	NA	NA	NA	SLC25A26	NA
rs2242285	3	66431602	A	G	322	0.033	1.94e-05	0.05	8.887	Unannotated	LRIG1	LRIG1	distance	0.982	0.033	120085	NA	NA	NA	SLC25A26	NA
rs332371	3	66432680	A	G	322	0.055	1.94e-05	0.082	9.3	Unannotated	LRIG1	LRIG1	distance	0.982	0.054	119007	chr3:66431650-66434609	NA	NA	SLC25A26	NA
rs332370	3	66433093	A	G	322	0.055	1.94e-05	0.082	9.299	Unannotated	LRIG1	LRIG1	distance	0.982	0.054	118594	chr3:66431650-66434609	NA	NA	SLC25A26	NA
rs900171	3	66433676	A	G	322	0.119	6.31e-05	0.054	8.926	Coding/Conserved	LRIG1	LRIG1	exons	0.982	0.119	118011	chr3:66431650-66434609	NA	NA	SLC25A26	NA
rs12633819	3	66448307	G	A	322	0.106	0.00079	0.004	7.755	CM specific ATAC	LRIG1	LRIG1	distance	0.982	0.105	103380	chr3:66442397-66485062	NA	NA	SLC25A26	NA
rs34080181	3	66454191	A	G	322	0.329	1.94e-05	0.488	9.893	Unannotated	LRIG1	LRIG1	distance	0.982	0.326	97496	chr3:66442397-66485062	NA	NA	SLC25A26	NA
rs4290808	3	69401238	G	A	324	0.057	3.9e-05	0.039	7.816	Non-CM ATAC	FRMD4B	FRMD4B	distance	0.535	0.027	190496	chr3:69401168-69403382	NA	chr3:69401059-69401259	NA	NA
rs4428187	3	69401248	A	G	324	0.066	3.9e-05	0.046	7.824	Non-CM ATAC	FRMD4B	FRMD4B	distance	0.535	0.032	190486	chr3:69401168-69403382	NA	chr3:69401059-69401259	NA	NA
rs17005647	3	69406181	T	C	324	0.185	1.94e-05	0.255	8.569	Unannotated	FRMD4B	LMOD3	distance	0.201	0.037	233998	NA	NA	NA	NA	NA
rs17005647	3	69406181	T	C	324	0.185	1.94e-05	0.255	8.569	Unannotated	FRMD4B	FRMD4B	distance	0.535	0.098	185553	NA	NA	NA	NA	NA
rs68061967	3	69406532	C	T	324	0.193	3.9e-05	0.132	8.441	Non-CM ATAC	FRMD4B	LMOD3	distance	0.201	0.039	234349	NA	NA	NA	NA	NA
rs68061967	3	69406532	C	T	324	0.193	3.9e-05	0.132	8.441	Non-CM ATAC	FRMD4B	FRMD4B	distance	0.535	0.103	185202	NA	NA	NA	NA	NA
rs2007584	3	69408944	T	C	324	0.075	1.94e-05	0.104	8.236	Unannotated	FRMD4B	FRMD4B	distance	0.535	0.042	182790	chr3:69408745-69409302	NA	NA	NA	NA
rs9868990	3	69413694	T	C	324	0.09	3.9e-05	0.062	8.102	Non-CM ATAC	FRMD4B	FRMD4B	distance	0.535	0.054	178040	NA	NA	NA	NA	NA
rs62254082	3	69417585	C	T	324	0.11	3.9e-05	0.075	8.198	Non-CM ATAC	FRMD4B	FRMD4B	distance	0.535	0.07	174149	chr3:69417096-69420994	chr3:69417555-69417639	NA	NA	NA
rs67316928	3	89482234	C	T	336	0.028	1.94e-05	0.037	9.852	Unannotated	EPHA3	EPHA3	distance	0.999	0.028	325560	NA	NA	NA	NA	NA
rs6771054	3	89489529	C	T	336	0.172	1.94e-05	0.224	10.616	Unannotated	EPHA3	EPHA3	distance	0.999	0.172	332855	NA	NA	NA	NA	NA
rs7637670	3	89493167	A	G	336	0.073	1.94e-05	0.095	10.309	Unannotated	EPHA3	EPHA3	distance	0.999	0.073	336493	NA	NA	NA	NA	NA
rs987748	3	89494030	A	C	336	0.06	1.94e-05	0.078	10.259	Unannotated	EPHA3	EPHA3	distance	0.999	0.06	337356	NA	NA	NA	NA	NA
rs35124509	3	89521693	C	T	336	0.345	6.31e-05	0.139	10.41	Coding/Conserved	EPHA3	EPHA3	exons	0.999	0.345	365019	NA	NA	NA	NA	NA
rs12636275	3	89523038	A	C	336	0.096	1.94e-05	0.126	10.41	Unannotated	EPHA3	EPHA3	distance	0.999	0.096	366364	NA	NA	NA	NA	NA
rs2117137	3	89525505	G	A	336	0.117	1.94e-05	0.153	10.463	Unannotated	EPHA3	EPHA3	distance	0.999	0.117	368831	NA	NA	NA	NA	NA
rs7650184	3	89530057	A	C	336	0.041	1.77e-05	0.059	10.231	Coding	EPHA3	EPHA3	exons	0.999	0.041	373383	NA	NA	NA	NA	NA
rs6794180	3	111530673	C	T	346	0.063	6.95e-05	0.038	13.969	Conserved	PHLDB2	PHLDB2	distance	0.408	0.036	79329	NA	NA	NA	NA	NA
rs9814037	3	111542871	G	A	346	0.156	0.00079	0.008	13.349	CM specific ATAC	PHLDB2	PLCXD2	distance	0.108	0.025	149348	chr3:111542542-111543684	chr3:111542633-111543086	NA	NA	NA
rs9814037	3	111542871	G	A	346	0.156	0.00079	0.008	13.349	CM specific ATAC	PHLDB2	PHLDB2	distance	0.408	0.079	91527	chr3:111542542-111543684	chr3:111542633-111543086	NA	NA	NA
rs9814037	3	111542871	G	A	346	0.156	0.00079	0.008	13.349	CM specific ATAC	PHLDB2	ABHD10	distance	0.212	0.022	154986	chr3:111542542-111543684	chr3:111542633-111543086	NA	NA	NA
rs10804493	3	111554426	G	A	346	0.131	1.94e-05	0.281	14.788	Unannotated	PHLDB2	PHLDB2	distance	0.408	0.056	103082	NA	NA	NA	NA	NA
rs10804493	3	111554426	G	A	346	0.131	1.94e-05	0.281	14.788	Unannotated	PHLDB2	ABHD10	distance	0.212	0.025	143431	NA	NA	NA	NA	NA
rs10212121	3	111560228	G	A	346	0.054	1.94e-05	0.116	14.279	Unannotated	PHLDB2	PHLDB2	distance	0.408	0.021	108884	NA	NA	NA	NA	NA
rs67396907	3	111583033	A	G	346	0.231	0.00282	0.003	12.853	CM specific ATAC/Conserved	ABHD10	PHLDB2	distance	0.408	0.052	131689	chr3:111577015-111589081	chr3:111582622-111583240	NA	NA	NA
rs67396907	3	111583033	A	G	346	0.231	0.00282	0.003	12.853	CM specific ATAC/Conserved	ABHD10	ABHD10	distance	0.212	0.073	114824	chr3:111577015-111589081	chr3:111582622-111583240	NA	NA	NA
rs67396907	3	111583033	A	G	346	0.231	0.00282	0.003	12.853	CM specific ATAC/Conserved	ABHD10	TAGLN3	distance	0.145	0.05	134478	chr3:111577015-111589081	chr3:111582622-111583240	NA	NA	NA
rs67396907	3	111583033	A	G	346	0.231	0.00282	0.003	12.853	CM specific ATAC/Conserved	ABHD10	TMPRSS7	distance	0.067	0.024	170657	chr3:111577015-111589081	chr3:111582622-111583240	NA	NA	NA
rs1282932	3	111589772	C	A	346	0.035	1.94e-05	0.074	14.055	Unannotated	ABHD10	PHLDB2	pcHiC	0.408	0.035	138428	NA	chr3:111589550-111589791	NA	NA	NA
rs1913494	3	111589962	G	A	346	0.035	1.94e-05	0.074	14.051	Unannotated	ABHD10	PHLDB2	pcHiC	0.408	0.035	138618	NA	NA	NA	NA	NA
rs1278493	3	135814009	G	A	361	0.122	1.94e-05	0.15	8.057	Unannotated	MSL2	PPP2R3A	distance	0.057	0.037	129494	NA	NA	NA	PCCB	NA
rs1278493	3	135814009	G	A	361	0.122	1.94e-05	0.15	8.057	Unannotated	MSL2	PCCB	distance	0.308	0.022	155139	NA	NA	NA	PCCB	NA
rs1278493	3	135814009	G	A	361	0.122	1.94e-05	0.15	8.057	Unannotated	MSL2	MSL2	distance	0.477	0.064	102074	NA	NA	NA	PCCB	NA
rs10935177	3	135851077	C	A	361	0.051	1.94e-05	0.062	7.593	Unannotated	MSL2	MSL2	distance	0.477	0.034	65006	NA	NA	NA	PCCB	NA
rs7349597	3	135911172	T	C	361	0.188	3.9e-05	0.115	7.815	Non-CM ATAC	MSL2	MSL2	nearby20kb	0.477	0.188	4911	chr3:135910992-135917582	NA	NA	PCCB	NA
rs1279831	3	135933264	G	A	361	0.079	1.94e-05	0.098	7.74	Unannotated	MSL2	PCCB	distance	0.308	0.032	35884	NA	NA	NA	PCCB	NA
rs1279831	3	135933264	G	A	361	0.079	1.94e-05	0.098	7.74	Unannotated	MSL2	MSL2	distance	0.477	0.047	17181	NA	NA	NA	PCCB	NA
rs642075	3	135933899	A	G	361	0.094	1.94e-05	0.115	7.831	Unannotated	MSL2	PCCB	distance	0.308	0.038	35249	NA	NA	NA	PCCB	NA
rs642075	3	135933899	A	G	361	0.094	1.94e-05	0.115	7.831	Unannotated	MSL2	MSL2	distance	0.477	0.055	17816	NA	NA	NA	PCCB	NA
rs1153877	3	136004925	T	C	361	0.028	1.94e-05	0.034	7.199	Unannotated	PCCB	PCCB	distance	0.308	0.021	35777	NA	NA	NA	PCCB	NA
rs696520	3	136056861	C	T	361	0.057	6.31e-05	0.022	7.019	Coding/Conserved	PCCB	STAG1	exons	0.134	0.057	414359	NA	NA	NA	PCCB	NA
rs900818	3	136471815	C	T	361	0.026	0.000329	0.002	5.933	CM shared ATAC	STAG1	STAG1	active.promoters	0.134	0.026	595	chr3:136467799-136474014	chr3:136469960-136472254	chr3:136471661-136471861	PCCB	NA
rs3806685	3	179039751	G	A	387	0.021	0.000329	0.007	6.959	CM shared ATAC	ZNF639	ZNF639	active.promoters	0.079	0.021	1028	chr3:179038801-179044002	NA	chr3:179039721-179039921	MFN1;GNB4	NA
rs73043442	3	179054320	T	C	387	0.104	0.00079	0.015	7.269	CM specific ATAC	MFN1	ZNF639	nearby20kb	0.079	0.035	13541	chr3:179052916-179055801	chr3:179054201-179054465	NA	MFN1;GNB4	NA
rs73043442	3	179054320	T	C	387	0.104	0.00079	0.015	7.269	CM specific ATAC	MFN1	MFN1	nearby20kb	0.07	0.035	11160	chr3:179052916-179055801	chr3:179054201-179054465	NA	MFN1;GNB4	NA
rs73043442	3	179054320	T	C	387	0.104	0.00079	0.015	7.269	CM specific ATAC	MFN1	ACTL6A	pcHiC	0.052	0.035	226348	chr3:179052916-179055801	chr3:179054201-179054465	NA	MFN1;GNB4	NA
rs7612445	3	179172979	T	G	387	0.707	0.000529	0.152	8.318	CM non-DA ATAC	GNB4	GNB4	ABC,nearby20kb	0.781	0.707	3601	chr3:179172709-179173499	NA	NA	GNB4	NA
rs7653402	3	194799732	G	A	397	0.391	0.00079	0.271	7.631	CM specific ATAC	XXYLT1	XXYLT1	distance	0.93	0.364	192164	chr3:194798358-194804541	NA	NA	XXYLT1	NA
rs60902112	3	194800853	T	C	397	0.59	0.00079	0.409	7.765	CM specific ATAC	XXYLT1	XXYLT1	distance	0.93	0.549	191043	chr3:194798358-194804541	NA	NA	XXYLT1	NA
rs1458038	4	81164723	T	C	453	0.978	0.00189	0.316	8.761	CM non-DA ATAC/Conserved	FGF5	PRDM8	distance	0.255	0.25	59690	NA	NA	NA	NA	NA
rs1458038	4	81164723	T	C	453	0.978	0.00189	0.316	8.761	CM non-DA ATAC/Conserved	FGF5	FGF5	distance	0.533	0.52	23030	NA	NA	NA	NA	NA
rs1458038	4	81164723	T	C	453	0.978	0.00189	0.316	8.761	CM non-DA ATAC/Conserved	FGF5	C4orf22	distance	0.134	0.131	92151	NA	NA	NA	NA	NA
rs1458038	4	81164723	T	C	453	0.978	0.00189	0.316	8.761	CM non-DA ATAC/Conserved	FGF5	ANTXR2	distance	0.079	0.078	118115	NA	NA	NA	NA	NA
rs223490	4	103679117	T	G	467	0.059	0.00079	0.002	6.395	CM specific ATAC	MANBA	MANBA	nearby20kb	0.158	0.059	3034	NA	NA	NA	NA	NA
rs223418	4	103730493	G	T	467	0.072	0.000329	0.007	6.95	CM shared ATAC	MANBA	SLC9B1	pcHiC	0.241	0.072	210403	chr4:103730135-103731482	chr4:103730467-103730655	NA	UBE2D3;BDH2	NA
rs223386	4	103750268	T	C	467	0.022	0.000529	0.001	6.201	CM non-DA ATAC	UBE2D3	UBE2D3	pcHiC	0.302	0.022	39785	chr4:103744151-103751150	chr4:103747631-103750562	NA	UBE2D3;BDH2	NA
rs223385	4	103750316	A	G	467	0.024	0.000529	0.001	6.215	CM non-DA ATAC	UBE2D3	UBE2D3	pcHiC	0.302	0.024	39737	chr4:103744151-103751150	chr4:103747631-103750562	NA	UBE2D3;BDH2	NA
rs223332	4	103790186	T	G	467	0.101	0.00107	0.003	6.555	CM shared ATAC/Coding/Conserved	CISD2	UBE2D3	active.promoters	0.302	0.051	133	chr4:103788711-103791555	chr4:103789757-103791192	chr4:103790070-103790270	UBE2D3;BDH2	NA
rs223332	4	103790186	T	G	467	0.101	0.00107	0.003	6.555	CM shared ATAC/Coding/Conserved	CISD2	CISD2	exons	0.214	0.051	51	chr4:103788711-103791555	chr4:103789757-103791192	chr4:103790070-103790270	UBE2D3;BDH2	NA
rs6815540	4	103881079	A	G	467	0.068	0.000529	0.004	6.66	CM non-DA ATAC	SLC9B1	SLC9B1	distance	0.241	0.026	59817	NA	NA	NA	UBE2D3;BDH2	NA
rs536594981	4	111106471	C	T	470	0.631	1.94e-05	0.633	8.885	Unannotated	ELOVL6	ENPEP	distance	0.171	0.022	180418	NA	NA	NA	NA	CEBPA - strong
rs536594981	4	111106471	C	T	470	0.631	1.94e-05	0.633	8.885	Unannotated	ELOVL6	ELOVL6	distance	0.819	0.604	13884	NA	NA	NA	NA	CEBPA - strong
rs185867667	4	111192996	T	C	470	0.286	1.94e-05	0.286	8.527	Unannotated	ELOVL6	ENPEP	distance	0.171	0.112	93893	NA	NA	NA	NA	NA
rs185867667	4	111192996	T	C	470	0.286	1.94e-05	0.286	8.527	Unannotated	ELOVL6	ELOVL6	distance	0.819	0.172	72641	NA	NA	NA	NA	NA
rs554333318	4	111205443	A	G	470	0.056	1.94e-05	0.056	7.78	Unannotated	ENPEP	ENPEP	distance	0.171	0.029	81446	NA	NA	NA	NA	NA
rs554333318	4	111205443	A	G	470	0.056	1.94e-05	0.056	7.78	Unannotated	ENPEP	ELOVL6	distance	0.819	0.027	85088	NA	NA	NA	NA	NA
rs1906615	4	111701798	T	G	471	0.798	1.94e-05	0.796	Inf	Unannotated	PITX2	PITX2	distance	0.997	0.794	138519	NA	NA	NA	NA	NA
rs7689774	4	111703510	T	G	471	0.15	1.94e-05	0.151	Inf	Unannotated	PITX2	PITX2	distance	0.997	0.149	140231	NA	NA	NA	NA	NA
rs2129982	4	111704143	G	A	471	0.028	1.94e-05	0.029	Inf	Unannotated	PITX2	PITX2	distance	0.997	0.028	140864	NA	NA	NA	NA	NA
rs2285703	4	114388820	G	A	472	0.054	0.000329	0.026	11.861	CM shared ATAC	CAMK2D	CAMK2D	pcHiC	0.991	0.054	294263	chr4:114387529-114396282	NA	NA	NA	NA
rs17446418	4	114418006	G	T	472	0.17	0.00079	0.034	12.171	CM specific ATAC	CAMK2D	CAMK2D	pcHiC	0.991	0.17	265077	NA	NA	NA	NA	NA
rs55754224	4	114428714	T	C	472	0.023	1.94e-05	0.192	12.667	Unannotated	CAMK2D	CAMK2D	distance	0.991	0.023	254369	NA	NA	NA	NA	NA
rs11098193	4	114429407	T	C	472	0.024	6.31e-05	0.06	12.376	Coding/Conserved	CAMK2D	CAMK2D	exons	0.991	0.024	253676	NA	NA	NA	NA	NA
rs11938486	4	114449719	C	A	472	0.649	0.00079	0.13	12.549	CM specific ATAC	CAMK2D	CAMK2D	distance	0.991	0.64	233364	NA	NA	NA	NA	NA
rs78453474	4	148927351	C	A	495	0.056	0.00079	0.008	9.534	CM specific ATAC	ARHGAP10	ARHGAP10	distance	0.62	0.036	274137	chr4:148926546-148930587	NA	NA	NA	NA
rs17676286	4	148928719	A	G	495	0.292	0.00079	0.044	10.235	CM specific ATAC	ARHGAP10	ARHGAP10	distance	0.62	0.191	275505	chr4:148926546-148930587	NA	NA	NA	NA
rs17676286	4	148928719	A	G	495	0.292	0.00079	0.044	10.235	CM specific ATAC	ARHGAP10	PRMT10	distance	0.238	0.073	323338	chr4:148926546-148930587	NA	NA	NA	NA
rs10005695	4	148969249	T	C	495	0.309	0.00079	0.047	10.229	CM specific ATAC	ARHGAP10	ARHGAP10	distance	0.62	0.183	316035	chr4:148964118-148970937	NA	NA	NA	TCF4 - strong
rs10005695	4	148969249	T	C	495	0.309	0.00079	0.047	10.229	CM specific ATAC	ARHGAP10	PRMT10	distance	0.238	0.07	363868	chr4:148964118-148970937	NA	NA	NA	TCF4 - strong
rs10005695	4	148969249	T	C	495	0.309	0.00079	0.047	10.229	CM specific ATAC	ARHGAP10	NR3C2	distance	0.074	0.036	396601	chr4:148964118-148970937	NA	NA	NA	TCF4 - strong
rs10006169	4	148969618	T	G	495	0.172	0.00079	0.026	10.066	CM specific ATAC	ARHGAP10	ARHGAP10	distance	0.62	0.101	316404	chr4:148964118-148970937	NA	NA	NA	NA
rs10006169	4	148969618	T	G	495	0.172	0.00079	0.026	10.066	CM specific ATAC	ARHGAP10	PRMT10	distance	0.238	0.039	364237	chr4:148964118-148970937	NA	NA	NA	NA
rs10006169	4	148969618	T	G	495	0.172	0.00079	0.026	10.066	CM specific ATAC	ARHGAP10	NR3C2	distance	0.074	0.021	396232	chr4:148964118-148970937	NA	NA	NA	NA
rs12648801	4	174633938	A	G	512	0.057	1.94e-05	0.069	12.02	Unannotated	HAND2	HAND2	distance	0.872	0.049	182558	NA	NA	NA	NA	NA
rs12648350	4	174635651	G	T	512	0.035	1.94e-05	0.043	11.654	Unannotated	HAND2	HAND2	distance	0.872	0.031	184271	NA	NA	NA	NA	NA
rs73006220	4	174636839	C	T	512	0.028	1.94e-05	0.034	11.565	Unannotated	HAND2	HAND2	distance	0.872	0.025	185459	NA	NA	NA	NA	NA
rs12647387	4	174640586	G	A	512	0.079	1.94e-05	0.097	12.051	Unannotated	HAND2	HAND2	distance	0.872	0.069	189206	NA	NA	NA	NA	NA
rs74500426	4	174642789	T	G	512	0.147	1.94e-05	0.179	12.368	Unannotated	HAND2	HAND2	distance	0.872	0.128	191409	NA	NA	NA	NA	NA
rs56031110	4	174645998	C	T	512	0.031	1.94e-05	0.038	11.761	Unannotated	HAND2	HAND2	distance	0.872	0.027	194618	NA	NA	NA	NA	NA
rs12643389	4	174647366	A	G	512	0.099	1.94e-05	0.121	12.138	Unannotated	HAND2	HAND2	distance	0.872	0.087	195986	NA	NA	NA	NA	NA
rs57909314	4	174649636	C	T	512	0.057	1.94e-05	0.07	11.899	Unannotated	HAND2	HAND2	distance	0.872	0.05	198256	NA	NA	NA	NA	NA
rs55850202	4	174651602	G	A	512	0.031	1.94e-05	0.038	11.7	Unannotated	HAND2	HAND2	distance	0.872	0.027	200222	NA	NA	NA	NA	NA
rs59637491	4	174651851	T	C	512	0.088	1.94e-05	0.107	12.183	Unannotated	HAND2	HAND2	distance	0.872	0.077	200471	NA	NA	NA	NA	NA
rs12645467	4	174654574	A	G	512	0.075	1.94e-05	0.092	12.047	Unannotated	HAND2	HAND2	distance	0.872	0.066	203194	NA	NA	NA	NA	NA
rs55729900	4	174655135	G	A	512	0.228	6.95e-05	0.078	11.983	Conserved	HAND2	HAND2	distance	0.872	0.198	203755	NA	NA	NA	NA	NA
rs6864971	5	106396918	C	T	584	0.047	1.94e-05	0.063	8.229	Unannotated	EFNA5	EFNA5	distance	1	0.047	609678	NA	NA	NA	NA	NA
rs4557390	5	106403683	T	C	584	0.05	6.95e-05	0.019	7.769	Conserved	EFNA5	EFNA5	distance	1	0.05	602913	NA	NA	NA	NA	NA
rs4429838	5	106403714	A	G	584	0.059	6.95e-05	0.022	7.843	Conserved	EFNA5	EFNA5	distance	1	0.059	602882	NA	NA	NA	NA	NA
rs6870023	5	106404866	C	T	584	0.054	6.95e-05	0.02	7.843	Conserved	EFNA5	EFNA5	distance	1	0.054	601730	NA	NA	NA	NA	NA
rs4289544	5	106409698	A	G	584	0.054	6.95e-05	0.02	7.85	Conserved	EFNA5	EFNA5	distance	1	0.054	596898	NA	NA	NA	NA	NA
rs6596717	5	106427609	C	A	584	0.077	1.94e-05	0.102	8.523	Unannotated	EFNA5	EFNA5	distance	1	0.077	578987	NA	NA	NA	NA	NA
rs4957530	5	106429925	T	G	584	0.055	1.94e-05	0.073	8.359	Unannotated	EFNA5	EFNA5	distance	1	0.055	576671	NA	NA	NA	NA	NA
rs6885021	5	106430225	G	A	584	0.05	1.94e-05	0.067	8.345	Unannotated	EFNA5	EFNA5	distance	1	0.05	576371	NA	NA	NA	NA	NA
rs2410935	5	106433320	C	T	584	0.043	1.94e-05	0.057	8.216	Unannotated	EFNA5	EFNA5	distance	1	0.043	573276	NA	NA	NA	NA	NA
rs6866458	5	106439512	G	A	584	0.051	1.94e-05	0.068	8.45	Unannotated	EFNA5	EFNA5	distance	1	0.051	567084	NA	NA	NA	NA	NA
rs6596720	5	106448934	T	G	584	0.036	1.94e-05	0.048	8.166	Unannotated	EFNA5	EFNA5	distance	1	0.036	557662	NA	NA	NA	NA	NA
rs4631165	5	106449853	C	T	584	0.026	1.94e-05	0.035	8.03	Unannotated	EFNA5	EFNA5	distance	1	0.026	556743	NA	NA	NA	NA	NA
rs6871532	5	106452732	C	T	584	0.026	6.95e-05	0.01	7.514	Conserved	EFNA5	EFNA5	distance	1	0.026	553864	NA	NA	NA	NA	NA
rs4957535	5	106559927	C	T	584	0.021	0.00079	0.001	6.263	CM specific ATAC	EFNA5	EFNA5	distance	1	0.021	446669	chr5:106559540-106560783	NA	NA	NA	NA
rs56255936	5	106566107	G	A	584	0.025	0.00079	0.001	6.256	CM specific ATAC	EFNA5	EFNA5	distance	1	0.025	440489	NA	NA	NA	NA	NA
rs337705	5	113737062	G	T	589	0.528	1.94e-05	0.528	15.787	Unannotated	KCNN2	KCNN2	distance	1	0.528	40420	NA	NA	NA	NA	NA
rs163210	5	113745738	C	T	589	0.071	1.94e-05	0.071	15.053	Unannotated	KCNN2	KCNN2	distance	1	0.071	49096	NA	NA	NA	NA	NA
rs337708	5	113746180	G	A	589	0.113	1.94e-05	0.113	15.264	Unannotated	KCNN2	KCNN2	distance	1	0.113	49538	NA	NA	NA	NA	NA
rs337711	5	113748571	T	C	589	0.089	1.94e-05	0.089	15.133	Unannotated	KCNN2	KCNN2	distance	1	0.089	51929	NA	NA	NA	NA	NA
rs168090	5	113749946	C	T	589	0.063	1.94e-05	0.063	14.874	Unannotated	KCNN2	KCNN2	distance	1	0.063	53304	NA	NA	NA	NA	NA
rs6859284	5	113757965	G	A	589	0.056	1.94e-05	0.056	14.764	Unannotated	KCNN2	KCNN2	distance	1	0.056	61323	NA	NA	NA	NA	NA
rs337683	5	113759435	A	G	589	0.035	1.94e-05	0.035	14.955	Unannotated	KCNN2	KCNN2	distance	1	0.035	62793	NA	NA	NA	NA	NA
rs338623	5	113764982	A	G	589	0.044	1.94e-05	0.044	15.047	Unannotated	KCNN2	KCNN2	distance	1	0.044	68340	NA	NA	NA	NA	NA
rs138741640	5	127873967	G	A	599	0.07	0.00282	0.003	6.549	CM specific ATAC/Conserved	SLC27A6	FBN2	ABC	0.179	0.023	120911	chr5:127869950-127875343	chr5:127872742-127875098	chr5:127873867-127874067	NA	NA
rs138741640	5	127873967	G	A	599	0.07	0.00282	0.003	6.549	CM specific ATAC/Conserved	SLC27A6	SLC27A6	nearby20kb	0.064	0.023	261	chr5:127869950-127875343	chr5:127872742-127875098	chr5:127873867-127874067	NA	NA
rs138741640	5	127873967	G	A	599	0.07	0.00282	0.003	6.549	CM specific ATAC/Conserved	SLC27A6	ISOC1	pcHiC	0.756	0.023	556477	chr5:127869950-127875343	chr5:127872742-127875098	chr5:127873867-127874067	NA	NA
rs7701236	5	128256696	C	T	599	0.112	0.00079	0.015	7.356	CM specific ATAC	ISOC1	ISOC1	distance	0.756	0.095	173748	chr5:128255647-128257891	chr5:128256380-128257002	NA	FBN2;SLC27A6	NA
rs55936379	5	128261643	A	G	599	0.146	0.00079	0.019	7.417	CM specific ATAC	ISOC1	ISOC1	distance	0.756	0.126	168801	chr5:128259989-128263180	chr5:128261476-128262603	NA	FBN2;SLC27A6	NA
rs55729238	5	128261740	G	A	599	0.137	0.00079	0.018	7.383	CM specific ATAC	ISOC1	ISOC1	distance	0.756	0.118	168704	chr5:128259989-128263180	chr5:128261476-128262603	NA	FBN2;SLC27A6	NA
rs56105026	5	128261926	A	G	599	0.137	0.00079	0.018	7.459	CM specific ATAC	ISOC1	ISOC1	distance	0.756	0.119	168518	chr5:128259989-128263180	chr5:128261476-128262603	NA	FBN2;SLC27A6	NA
rs10520015	5	128262334	G	A	599	0.202	0.00079	0.027	7.643	CM specific ATAC	ISOC1	ISOC1	distance	0.756	0.176	168110	chr5:128259989-128263180	chr5:128261476-128262603	NA	FBN2;SLC27A6	NA
rs10520015	5	128262334	G	A	599	0.202	0.00079	0.027	7.643	CM specific ATAC	ISOC1	FBN2	distance	0.179	0.024	267456	chr5:128259989-128263180	chr5:128261476-128262603	NA	FBN2;SLC27A6	NA
rs73300168	5	137270655	C	T	603	0.41	0.00079	0.029	34.164	CM specific ATAC	PKD2L2	MYOT	distance	0.141	0.121	67175	NA	NA	NA	FAM13B	RFX1 - strong
rs73300168	5	137270655	C	T	603	0.41	0.00079	0.029	34.164	CM specific ATAC	PKD2L2	PKD2L2	distance	0.283	0.181	46998	NA	NA	NA	FAM13B	RFX1 - strong
rs73300168	5	137270655	C	T	603	0.41	0.00079	0.029	34.164	CM specific ATAC	PKD2L2	WNT8A	distance	0.056	0.024	148926	NA	NA	NA	FAM13B	RFX1 - strong
rs73300168	5	137270655	C	T	603	0.41	0.00079	0.029	34.164	CM specific ATAC	PKD2L2	FAM13B	distance	0.106	0.045	116995	NA	NA	NA	FAM13B	RFX1 - strong
rs17171711	5	137364795	T	C	603	0.346	6.95e-05	0.276	34.71	Conserved	FAM13B	KIF20A	pcHiC	0.355	0.346	149613	NA	NA	NA	FAM13B	NA
rs2040862	5	137419989	T	C	603	0.073	1.94e-05	0.208	34.968	Unannotated	WNT8A	PKD2L2	pcHiC	0.283	0.073	196332	NA	NA	NA	FAM13B	NA
rs6580277	5	142818123	G	A	605	0.062	1.94e-05	0.086	16.784	Unannotated	NR3C1	NR3C1	distance	0.975	0.062	3046	NA	NA	NA	NA	NA
rs146462216	5	142825005	A	G	605	0.03	1.94e-05	0.041	16.276	Unannotated	NR3C1	NR3C1	distance	0.975	0.03	9928	NA	NA	NA	NA	NA
rs11739465	5	142834294	T	C	605	0.022	1.94e-05	0.03	16.176	Unannotated	NR3C1	NR3C1	distance	0.975	0.022	19217	NA	NA	NA	NA	NA
rs72802828	5	142835620	T	C	605	0.041	1.94e-05	0.056	16.437	Unannotated	NR3C1	NR3C1	distance	0.975	0.041	20543	NA	NA	NA	NA	NA
rs7700825	5	142850814	A	G	605	0.034	0.000529	0.002	14.744	CM non-DA ATAC	NR3C1	NR3C1	distance	0.975	0.034	35737	chr5:142850302-142851413	chr5:142850617-142850845	NA	NA	NA
rs17341964	5	142893603	G	A	605	0.052	1.94e-05	0.072	16.579	Unannotated	NR3C1	NR3C1	distance	0.975	0.051	78526	NA	NA	NA	NA	NA
rs72804738	5	142914112	C	T	605	0.208	0.00079	0.007	15.534	CM specific ATAC	NR3C1	NR3C1	distance	0.975	0.203	99035	NA	chr5:142913993-142915043	NA	NA	NA
rs17402406	5	142916485	T	G	605	0.022	1.94e-05	0.03	16.049	Unannotated	NR3C1	NR3C1	distance	0.975	0.021	101408	chr5:142916187-142916592	NA	NA	NA	NA
rs72804756	5	142926837	A	G	605	0.032	1.94e-05	0.044	16.216	Unannotated	NR3C1	NR3C1	distance	0.975	0.03	111760	NA	NA	NA	NA	NA
rs72806718	5	142927670	C	A	605	0.022	1.94e-05	0.03	16.061	Unannotated	NR3C1	NR3C1	distance	0.975	0.021	112593	NA	NA	NA	NA	NA
rs17402664	5	142928005	T	C	605	0.029	1.94e-05	0.04	16.205	Unannotated	NR3C1	NR3C1	distance	0.975	0.028	112928	NA	NA	NA	NA	NA
rs12188351	5	168386089	A	G	621	0.037	6.95e-05	0.09	8.599	Conserved	SLIT3	SLIT3	distance	0.642	0.021	342044	NA	NA	NA	NA	NA
rs62377224	5	168392730	C	A	621	0.143	0.000529	0.046	8.304	CM non-DA ATAC	SLIT3	PANK3	distance	0.233	0.033	386125	NA	chr5:168392594-168392892	NA	NA	NA
rs62377224	5	168392730	C	A	621	0.143	0.000529	0.046	8.304	CM non-DA ATAC	SLIT3	SLIT3	distance	0.642	0.092	335403	NA	chr5:168392594-168392892	NA	NA	NA
rs58172923	5	168392806	T	C	621	0.054	0.000529	0.017	7.859	CM non-DA ATAC	SLIT3	SLIT3	distance	0.642	0.035	335327	NA	chr5:168392594-168392892	NA	NA	NA
rs62377226	5	168392861	T	C	621	0.143	0.000529	0.046	8.296	CM non-DA ATAC	SLIT3	PANK3	distance	0.233	0.033	386256	chr5:168392851-168393105	chr5:168392594-168392892	NA	NA	NA
rs62377226	5	168392861	T	C	621	0.143	0.000529	0.046	8.296	CM non-DA ATAC	SLIT3	SLIT3	distance	0.642	0.092	335272	chr5:168392851-168393105	chr5:168392594-168392892	NA	NA	NA
rs62377227	5	168392879	A	G	621	0.143	0.000529	0.046	8.287	CM non-DA ATAC	SLIT3	PANK3	distance	0.233	0.033	386274	chr5:168392851-168393105	chr5:168392594-168392892	NA	NA	NA
rs62377227	5	168392879	A	G	621	0.143	0.000529	0.046	8.287	CM non-DA ATAC	SLIT3	SLIT3	distance	0.642	0.092	335254	chr5:168392851-168393105	chr5:168392594-168392892	NA	NA	NA
rs62377228	5	168392954	C	T	621	0.143	0.000529	0.046	8.281	CM non-DA ATAC	SLIT3	PANK3	distance	0.233	0.033	386349	chr5:168392851-168393105	NA	NA	NA	NA
rs62377228	5	168392954	C	T	621	0.143	0.000529	0.046	8.281	CM non-DA ATAC	SLIT3	SLIT3	distance	0.642	0.092	335179	chr5:168392851-168393105	NA	NA	NA	NA
rs62377230	5	168393021	A	G	621	0.204	0.000529	0.066	8.415	CM non-DA ATAC	SLIT3	PANK3	distance	0.233	0.047	386416	chr5:168392851-168393105	NA	NA	NA	NA
rs62377230	5	168393021	A	G	621	0.204	0.000529	0.066	8.415	CM non-DA ATAC	SLIT3	SLIT3	distance	0.642	0.131	335112	chr5:168392851-168393105	NA	NA	NA	NA
rs2277923	5	172662024	C	T	624	0.157	0.00256	0.054	20.284	CM specific ATAC/Coding/Conserved	NKX2-5	NKX2-5	exons	0.989	0.157	336	chr5:172655088-172677340	chr5:172661748-172663770	chr5:172662014-172662214	NA	NA
rs6882776	5	172664163	A	G	624	0.37	0.00079	0.415	21.016	CM specific ATAC	NKX2-5	NKX2-5	active.promoters	0.989	0.37	1803	chr5:172655088-172677340	chr5:172663810-172664823	NA	NA	NA
rs10071514	5	172669771	G	A	624	0.133	0.00079	0.149	20.859	CM specific ATAC	NKX2-5	NKX2-5	ABC,nearby20kb	0.989	0.133	7411	chr5:172655088-172677340	chr5:172668986-172670302	NA	NA	NA
rs6891790	5	172670745	T	G	624	0.318	0.00079	0.356	21.344	CM specific ATAC	NKX2-5	NKX2-5	ABC,nearby20kb	0.989	0.318	8385	chr5:172655088-172677340	NA	NA	NA	NA
rs56197583	5	173336792	A	G	625	0.047	0.000529	0.024	10.624	CM non-DA ATAC	CPEB4	CPEB4	distance	0.437	0.031	21509	chr5:173332254-173338132	NA	NA	CPEB4;C5orf47;NSG2	NA
rs7736263	5	173339222	T	G	625	0.036	0.000529	0.018	10.562	CM non-DA ATAC	CPEB4	CPEB4	distance	0.437	0.023	23939	chr5:173338374-173355425	NA	NA	CPEB4;C5orf47;NSG2	NA
rs112299234	5	173339531	C	T	625	0.043	0.000529	0.022	10.699	CM non-DA ATAC	CPEB4	CPEB4	distance	0.437	0.027	24248	chr5:173338374-173355425	NA	NA	CPEB4;C5orf47;NSG2	NA
rs72812804	5	173340496	G	T	625	0.049	0.00079	0.016	10.52	CM specific ATAC	CPEB4	CPEB4	distance	0.437	0.03	25213	chr5:173338374-173355425	NA	NA	CPEB4;C5orf47;NSG2	NA
rs72812805	5	173344153	C	T	625	0.036	0.000529	0.018	10.545	CM non-DA ATAC	CPEB4	BOD1	pcHiC	0.35	0.036	300490	chr5:173338374-173355425	NA	NA	CPEB4;C5orf47;NSG2	NA
rs10516107	5	173348156	A	G	625	0.041	0.00079	0.014	10.447	CM specific ATAC	CPEB4	CPEB4	distance	0.437	0.022	32873	chr5:173338374-173355425	chr5:173348016-173348389	NA	CPEB4;C5orf47;NSG2	NA
rs75738222	5	173349404	T	C	625	0.049	0.00079	0.016	10.496	CM specific ATAC	CPEB4	BOD1	pcHiC	0.35	0.049	305741	chr5:173338374-173355425	NA	NA	CPEB4;C5orf47;NSG2	NA
rs1484803	5	173349840	G	A	625	0.041	0.00079	0.014	10.432	CM specific ATAC	CPEB4	BOD1	pcHiC	0.35	0.041	306177	chr5:173338374-173355425	chr5:173349801-173349857	NA	CPEB4;C5orf47;NSG2	NA
rs72812811	5	173350990	A	G	625	0.061	0.00117	0.014	10.419	CM shared ATAC/Conserved	CPEB4	BOD1	pcHiC	0.35	0.061	307327	chr5:173338374-173355425	chr5:173350710-173351136	chr5:173350823-173351023	CPEB4;C5orf47;NSG2	NA
rs747472	5	173353514	C	T	625	0.134	0.00282	0.013	10.393	CM specific ATAC/Conserved	CPEB4	CPEB4	distance	0.437	0.066	38231	chr5:173338374-173355425	chr5:173353310-173353687	NA	CPEB4;C5orf47;NSG2	NA
rs747472	5	173353514	C	T	625	0.134	0.00282	0.013	10.393	CM specific ATAC/Conserved	CPEB4	C5orf47	distance	0.177	0.055	47268	chr5:173338374-173355425	chr5:173353310-173353687	NA	CPEB4;C5orf47;NSG2	NA
rs72812847	5	173377817	A	G	625	0.054	0.00079	0.018	10.489	CM specific ATAC	C5orf47	BOD1	pcHiC	0.35	0.054	334154	chr5:173377701-173378253	NA	NA	CPEB4;C5orf47;NSG2	NA
rs59755656	5	173378180	G	A	625	0.059	0.00079	0.02	10.573	CM specific ATAC	C5orf47	BOD1	pcHiC	0.35	0.059	334517	chr5:173377701-173378253	NA	NA	CPEB4;C5orf47;NSG2	NA
rs17763772	5	173380934	G	A	625	0.054	0.00079	0.018	10.464	CM specific ATAC	C5orf47	C5orf47	nearby20kb	0.177	0.027	19848	chr5:173378974-173384498	chr5:173380706-173380974	NA	CPEB4;C5orf47;NSG2	NA
rs17763772	5	173380934	G	A	625	0.054	0.00079	0.018	10.464	CM specific ATAC	C5orf47	BOD1	pcHiC	0.35	0.027	337271	chr5:173378974-173384498	chr5:173380706-173380974	NA	CPEB4;C5orf47;NSG2	NA
rs1564823	5	173383194	A	C	625	0.175	0.00256	0.018	10.484	CM specific ATAC/Coding/Conserved	C5orf47	CPEB4	exons	0.437	0.175	67911	chr5:173378974-173384498	chr5:173382730-173383261	NA	CPEB4;C5orf47;NSG2	NA
rs7770062	6	16413625	A	G	644	0.054	3.9e-05	0.139	24.552	Non-CM ATAC	GMPR	ATXN1	pcHiC	1	0.054	348097	NA	NA	NA	NA	NA
rs59430691	6	16414553	A	G	644	0.809	0.000529	0.154	24.606	CM non-DA ATAC	GMPR	ATXN1	pcHiC	1	0.809	347169	chr6:16413991-16415166	chr6:16414282-16415107	NA	NA	NA
rs113755256	6	16415621	A	G	644	0.041	1.94e-05	0.21	24.6	Unannotated	GMPR	ATXN1	pcHiC	1	0.041	346101	NA	NA	NA	NA	NA
rs73366713	6	16415751	A	G	644	0.056	1.94e-05	0.288	24.815	Unannotated	GMPR	ATXN1	pcHiC	1	0.056	345971	chr6:16415622-16415839	NA	NA	NA	NA
rs73724866	6	16415856	A	G	644	0.037	1.94e-05	0.19	24.569	Unannotated	GMPR	ATXN1	pcHiC	1	0.037	345866	NA	NA	NA	NA	NA
rs34969716	6	18210109	A	G	645	1	0.0323	0.777	18.797	CM specific ATAC/eQTL	KDM1B	KDM1B	distance	0.273	0.273	54549	chr6:18209288-18211049	NA	NA	TPMT;KDM1B;DEK	FOXD1 - strong
rs34969716	6	18210109	A	G	645	1	0.0323	0.777	18.797	CM specific ATAC/eQTL	KDM1B	RNF144B	distance	0.034	0.034	158670	chr6:18209288-18211049	NA	NA	TPMT;KDM1B;DEK	FOXD1 - strong
rs34969716	6	18210109	A	G	645	1	0.0323	0.777	18.797	CM specific ATAC/eQTL	KDM1B	NHLRC1	distance	0.142	0.142	87258	chr6:18209288-18211049	NA	NA	TPMT;KDM1B;DEK	FOXD1 - strong
rs34969716	6	18210109	A	G	645	1	0.0323	0.777	18.797	CM specific ATAC/eQTL	KDM1B	TPMT	distance	0.271	0.271	54804	chr6:18209288-18211049	NA	NA	TPMT;KDM1B;DEK	FOXD1 - strong
rs34969716	6	18210109	A	G	645	1	0.0323	0.777	18.797	CM specific ATAC/eQTL	KDM1B	DEK	distance	0.271	0.271	54945	chr6:18209288-18211049	NA	NA	TPMT;KDM1B;DEK	FOXD1 - strong
rs3176326	6	36647289	A	G	660	1	0.000329	1	12.847	CM shared ATAC	CDKN1A	CDKN1A	ABC,nearby20kb	0.167	0.167	2984	chr6:36643831-36649345	chr6:36646975-36647418	NA	NA	NA
rs3176326	6	36647289	A	G	660	1	0.000329	1	12.847	CM shared ATAC	CDKN1A	ETV7	pcHiC	0.167	0.167	291125	chr6:36643831-36649345	chr6:36646975-36647418	NA	NA	NA
rs3176326	6	36647289	A	G	660	1	0.000329	1	12.847	CM shared ATAC	CDKN1A	PXT1	pcHiC	0.167	0.167	236623	chr6:36643831-36649345	chr6:36646975-36647418	NA	NA	NA
rs3176326	6	36647289	A	G	660	1	0.000329	1	12.847	CM shared ATAC	CDKN1A	SRSF3	pcHiC	0.167	0.167	85144	chr6:36643831-36649345	chr6:36646975-36647418	NA	NA	NA
rs3176326	6	36647289	A	G	660	1	0.000329	1	12.847	CM shared ATAC	CDKN1A	RAB44	pcHiC	0.167	0.167	35967	chr6:36643831-36649345	chr6:36646975-36647418	NA	NA	NA
rs3176326	6	36647289	A	G	660	1	0.000329	1	12.847	CM shared ATAC	CDKN1A	FGD2	pcHiC	0.167	0.167	326133	chr6:36643831-36649345	chr6:36646975-36647418	NA	NA	NA
rs9362398	6	87862095	G	A	690	0.025	0.000329	0.003	8.644	CM shared ATAC	ZNF292	ZNF292	active.promoters	0.297	0.025	456	chr6:87860596-87866690	chr6:87861184-87862695	NA	NA	NA
rs6908834	6	87965528	C	T	690	0.026	6.31e-05	0.014	9.496	Coding/Conserved	SMIM8	ZNF292	exons	0.297	0.026	102977	NA	NA	NA	SMIM8	NA
rs2474349	6	88032398	T	G	690	0.028	0.00079	0.001	8.478	CM specific ATAC	RP1-102H19.8	SMIM8	ABC	0.265	0.028	97	chr6:88031860-88033020	chr6:88032068-88032922	NA	NA	NA
rs2257153	6	88032402	C	A	690	0.061	0.00079	0.003	8.848	CM specific ATAC	RP1-102H19.8	SMIM8	ABC	0.265	0.061	101	chr6:88031860-88033020	chr6:88032068-88032922	NA	SMIM8	NA
rs374792	6	88044558	A	G	690	0.086	0.00079	0.004	8.81	CM specific ATAC	GJB7	SMIM8	ABC,nearby20kb	0.265	0.043	12257	chr6:88043292-88044842	chr6:88044249-88045017	NA	SMIM8	NA
rs374792	6	88044558	A	G	690	0.086	0.00079	0.004	8.81	CM specific ATAC	GJB7	RP1-102H19.8	nearby20kb	0.176	0.043	12235	chr6:88043292-88044842	chr6:88044249-88045017	NA	SMIM8	NA
rs385210	6	88044645	T	C	690	0.086	0.00079	0.004	8.82	CM specific ATAC	GJB7	SMIM8	ABC,nearby20kb	0.265	0.043	12344	chr6:88043292-88044842	chr6:88044249-88045017	NA	SMIM8	NA
rs385210	6	88044645	T	C	690	0.086	0.00079	0.004	8.82	CM specific ATAC	GJB7	RP1-102H19.8	nearby20kb	0.176	0.043	12322	chr6:88043292-88044842	chr6:88044249-88045017	NA	SMIM8	NA
rs9401060	6	118561348	G	A	709	0.093	1.94e-05	0.093	20.761	Unannotated	PLN	SLC35F1	distance	0.298	0.034	332659	NA	NA	NA	NA	NA
rs9401060	6	118561348	G	A	709	0.093	1.94e-05	0.093	20.761	Unannotated	PLN	PLN	distance	0.935	0.056	308113	NA	NA	NA	NA	NA
rs4946333	6	118565665	G	A	709	0.255	1.94e-05	0.257	21.262	Unannotated	PLN	SLC35F1	distance	0.298	0.084	336976	NA	NA	NA	NA	NA
rs4946333	6	118565665	G	A	709	0.255	1.94e-05	0.257	21.262	Unannotated	PLN	PLN	distance	0.935	0.163	303796	NA	NA	NA	NA	NA
rs6912208	6	118566516	G	A	709	0.191	1.94e-05	0.192	21.125	Unannotated	PLN	SLC35F1	distance	0.298	0.062	337827	NA	NA	NA	NA	NA
rs6912208	6	118566516	G	A	709	0.191	1.94e-05	0.192	21.125	Unannotated	PLN	PLN	distance	0.935	0.124	302945	NA	NA	NA	NA	NA
rs283077	6	118569679	T	G	709	0.191	1.94e-05	0.192	21.123	Unannotated	PLN	SLC35F1	distance	0.298	0.056	340990	NA	NA	NA	NA	NA
rs283077	6	118569679	T	G	709	0.191	1.94e-05	0.192	21.123	Unannotated	PLN	PLN	distance	0.935	0.129	299782	NA	NA	NA	NA	NA
rs281868	6	118574061	G	A	709	0.165	1.94e-05	0.166	21.097	Unannotated	PLN	SLC35F1	distance	0.298	0.043	345372	NA	NA	NA	NA	NA
rs281868	6	118574061	G	A	709	0.165	1.94e-05	0.166	21.097	Unannotated	PLN	PLN	distance	0.935	0.117	295400	NA	NA	NA	NA	NA
rs89107	6	118578043	G	A	709	0.08	1.94e-05	0.081	20.759	Unannotated	PLN	PLN	distance	0.935	0.059	291418	NA	NA	NA	NA	NA
rs9481842	6	118974798	G	T	710	0.995	1.94e-05	0.996	20.455	Unannotated	CEP85L	PLN	distance	0.935	0.265	105337	NA	NA	NA	NA	NA
rs9481842	6	118974798	G	T	710	0.995	1.94e-05	0.996	20.455	Unannotated	CEP85L	CEP85L	distance	0.737	0.704	56440	NA	NA	NA	NA	NA
rs939601	6	122389643	C	T	713	0.4	0.00189	0.018	17.416	CM non-DA ATAC/Conserved	HSF2	HSF2	distance	0.675	0.271	331048	chr6:122389062-122390230	chr6:122389599-122389793	NA	NA	EOMES - strong,IRX4 - strong,IRX6 - strong,MGA - strong,MITF - strong
rs939601	6	122389643	C	T	713	0.4	0.00189	0.018	17.416	CM non-DA ATAC/Conserved	HSF2	PKIB	distance	0.159	0.064	403433	chr6:122389062-122390230	chr6:122389599-122389793	NA	NA	EOMES - strong,IRX4 - strong,IRX6 - strong,MGA - strong,MITF - strong
rs939601	6	122389643	C	T	713	0.4	0.00189	0.018	17.416	CM non-DA ATAC/Conserved	HSF2	SERINC1	distance	0.159	0.064	403324	chr6:122389062-122390230	chr6:122389599-122389793	NA	NA	EOMES - strong,IRX4 - strong,IRX6 - strong,MGA - strong,MITF - strong
rs868155	6	122389906	T	C	713	0.163	0.000529	0.027	17.548	CM non-DA ATAC	HSF2	HSF2	distance	0.675	0.111	330785	chr6:122389062-122390230	NA	NA	NA	NA
rs868155	6	122389906	T	C	713	0.163	0.000529	0.027	17.548	CM non-DA ATAC	HSF2	PKIB	distance	0.159	0.026	403170	chr6:122389062-122390230	NA	NA	NA	NA
rs868155	6	122389906	T	C	713	0.163	0.000529	0.027	17.548	CM non-DA ATAC	HSF2	SERINC1	distance	0.159	0.026	403061	chr6:122389062-122390230	NA	NA	NA	NA
rs868154	6	122389940	A	G	713	0.127	0.000529	0.021	17.438	CM non-DA ATAC	HSF2	HSF2	distance	0.675	0.086	330751	chr6:122389062-122390230	NA	NA	NA	NA
rs868154	6	122389940	A	G	713	0.127	0.000529	0.021	17.438	CM non-DA ATAC	HSF2	PKIB	distance	0.159	0.02	403136	chr6:122389062-122390230	NA	NA	NA	NA
rs868154	6	122389940	A	G	713	0.127	0.000529	0.021	17.438	CM non-DA ATAC	HSF2	SERINC1	distance	0.159	0.02	403027	chr6:122389062-122390230	NA	NA	NA	NA
rs868153	6	122389955	G	T	713	0.099	0.000529	0.016	17.314	CM non-DA ATAC	HSF2	HSF2	distance	0.675	0.067	330736	chr6:122389062-122390230	NA	NA	NA	NA
rs117984853	6	149399100	T	G	728	1	3.9e-05	1	23.872	Non-CM ATAC	TAB2	UST	distance	0.021	0.021	330636	chr6:149398946-149399274	NA	NA	NA	NA
rs117984853	6	149399100	T	G	728	1	3.9e-05	1	23.872	Non-CM ATAC	TAB2	TAB2	distance	0.947	0.947	140677	chr6:149398946-149399274	NA	NA	NA	NA
rs117984853	6	149399100	T	G	728	1	3.9e-05	1	23.872	Non-CM ATAC	TAB2	SUMO4	distance	0.025	0.025	322395	chr6:149398946-149399274	NA	NA	NA	NA
rs55734480	7	14372009	A	G	758	0.403	1.94e-05	0.403	11.657	Unannotated	ETV1	ETV1	distance	0.998	0.402	340959	NA	chr7:14371813-14372213	NA	NA	NA
rs12112152	7	14372302	C	T	758	0.218	1.94e-05	0.218	11.469	Unannotated	ETV1	ETV1	distance	0.998	0.217	341252	NA	NA	NA	NA	NA
rs12154315	7	14373714	T	C	758	0.338	1.94e-05	0.338	11.471	Unannotated	ETV1	ETV1	distance	0.998	0.337	342664	NA	NA	NA	NA	IRF1 - strong
rs10234589	7	14385786	T	C	758	0.035	1.94e-05	0.035	10.488	Unannotated	ETV1	ETV1	pcHiC	0.998	0.035	354736	NA	NA	NA	NA	NA
rs6948592	7	28408309	T	C	767	0.028	1.94e-05	0.106	9.001	Unannotated	CREB5	CREB5	distance	0.915	0.026	69369	NA	NA	NA	NA	NA
rs7782838	7	28411649	G	T	767	0.368	0.000529	0.051	8.515	CM non-DA ATAC	CREB5	CREB5	distance	0.915	0.337	72709	NA	chr7:28411371-28411833	NA	NA	NA
rs7782838	7	28411649	G	T	767	0.368	0.000529	0.051	8.515	CM non-DA ATAC	CREB5	JAZF1	distance	0.085	0.031	191287	NA	chr7:28411371-28411833	NA	NA	NA
rs7782844	7	28411654	G	A	767	0.395	0.000529	0.055	8.533	CM non-DA ATAC	CREB5	CREB5	distance	0.915	0.361	72714	NA	chr7:28411371-28411833	NA	NA	NA
rs7782844	7	28411654	G	A	767	0.395	0.000529	0.055	8.533	CM non-DA ATAC	CREB5	JAZF1	distance	0.085	0.034	191292	NA	chr7:28411371-28411833	NA	NA	NA
rs6462078	7	28413187	C	A	767	0.023	1.94e-05	0.087	8.77	Unannotated	CREB5	CREB5	distance	0.915	0.021	74247	NA	NA	NA	NA	NA
rs6462079	7	28415827	G	A	767	0.037	1.94e-05	0.139	9.056	Unannotated	CREB5	CREB5	distance	0.915	0.034	76887	NA	chr7:28415767-28415879	NA	NA	NA
rs74910854	7	74110705	G	A	791	0.6	1.94e-05	0.904	7.365	Unannotated	GTF2I	GTF2I	distance	0.39	0.379	38711	NA	NA	NA	GTF2IRD2	NA
rs74910854	7	74110705	G	A	791	0.6	1.94e-05	0.904	7.365	Unannotated	GTF2I	NCF1	distance	0.175	0.174	77604	NA	NA	NA	GTF2IRD2	NA
rs74910854	7	74110705	G	A	791	0.6	1.94e-05	0.904	7.365	Unannotated	GTF2I	GTF2IRD2	distance	0.037	0.035	157142	NA	NA	NA	GTF2IRD2	NA
rs60932781	7	75049359	T	C	791	0.056	0.00079	0.002	4.568	CM specific ATAC	TRIM73	TRIM73	distance	0.122	0.026	25022	NA	chr7:75049084-75049383	NA	NA	NA
rs6966722	7	75072013	A	G	791	0.247	0.00189	0.004	4.836	CM non-DA ATAC/Conserved	POM121C	TRIM73	distance	0.122	0.087	47676	chr7:75071279-75072701	NA	NA	NA	NA
rs6966722	7	75072013	A	G	791	0.247	0.00189	0.004	4.836	CM non-DA ATAC/Conserved	POM121C	AC006014.1	distance	0.084	0.06	66588	chr7:75071279-75072701	NA	NA	NA	NA
rs6966722	7	75072013	A	G	791	0.247	0.00189	0.004	4.836	CM non-DA ATAC/Conserved	POM121C	POM121C	distance	0.129	0.095	43535	chr7:75071279-75072701	NA	NA	NA	NA
rs56201652	7	92278116	A	G	799	0.063	1.94e-05	0.177	11.759	Unannotated	FAM133B	FAM133B	distance	0.426	0.035	58408	NA	NA	NA	NA	NA
rs11773884	7	92285123	G	A	799	0.47	0.000529	0.049	11.132	CM non-DA ATAC	FAM133B	RBM48	distance	0.124	0.074	127036	NA	NA	NA	NA	NA
rs11773884	7	92285123	G	A	799	0.47	0.000529	0.049	11.132	CM non-DA ATAC	FAM133B	ERVW-1	distance	0.045	0.027	177823	NA	NA	NA	NA	NA
rs11773884	7	92285123	G	A	799	0.47	0.000529	0.049	11.132	CM non-DA ATAC	FAM133B	PEX1	distance	0.124	0.074	127278	NA	NA	NA	NA	NA
rs11773884	7	92285123	G	A	799	0.47	0.000529	0.049	11.132	CM non-DA ATAC	FAM133B	FAM133B	distance	0.426	0.254	65415	NA	NA	NA	NA	NA
rs11773884	7	92285123	G	A	799	0.47	0.000529	0.049	11.132	CM non-DA ATAC	FAM133B	CDK6	distance	0.255	0.025	180785	NA	NA	NA	NA	NA
rs7804722	7	92288106	C	T	799	0.04	1.94e-05	0.112	11.565	Unannotated	FAM133B	FAM133B	distance	0.426	0.021	68398	NA	NA	NA	NA	NA
rs3731326	7	92327026	G	A	799	0.169	0.000529	0.017	10.758	CM non-DA ATAC	FAM133B	CDK6	pcHiC	0.255	0.169	138882	chr7:92323809-92329136	chr7:92326378-92327161	NA	NA	NA
rs3807989	7	116186241	A	G	813	0.95	0.00282	0.116	53.906	CM specific ATAC/Conserved	CAV1	CAV1	distance	0.873	0.831	21402	chr7:116177058-116189494	chr7:116185862-116186519	NA	NA	MITF - strong,SCRT2 - strong
rs3807989	7	116186241	A	G	813	0.95	0.00282	0.116	53.906	CM specific ATAC/Conserved	CAV1	MET	distance	0.109	0.102	126203	chr7:116177058-116189494	chr7:116185862-116186519	NA	NA	MITF - strong,SCRT2 - strong
rs11773845	7	116191301	C	A	813	0.033	1.94e-05	0.591	54.622	Unannotated	CAV1	CAV1	distance	0.873	0.029	26462	chr7:116189623-116201555	NA	NA	NA	NA
rs55985730	7	128417044	G	T	821	0.91	1.94e-05	0.977	8.281	Unannotated	OPN1SW	CALU	pcHiC	0.917	0.91	37698	NA	NA	NA	NA	BATF - strong
rs2269000	7	150650792	A	G	836	0.166	0.00079	0.073	10.272	CM specific ATAC	KCNH2	NOS3	distance	0.094	0.033	37291	chr7:150648803-150677929	chr7:150650131-150651009	NA	NA	NA
rs2269000	7	150650792	A	G	836	0.166	0.00079	0.073	10.272	CM specific ATAC	KCNH2	KCNH2	distance	0.345	0.042	24611	chr7:150648803-150677929	chr7:150650131-150651009	NA	NA	NA
rs2269001	7	150651816	A	G	836	0.228	0.00079	0.1	10.396	CM specific ATAC	KCNH2	NOS3	distance	0.094	0.045	36267	chr7:150648803-150677929	chr7:150651609-150652539	NA	NA	NA
rs2269001	7	150651816	A	G	836	0.228	0.00079	0.1	10.396	CM specific ATAC	KCNH2	ABCB8	distance	0.05	0.021	73694	chr7:150648803-150677929	chr7:150651609-150652539	NA	NA	NA
rs2269001	7	150651816	A	G	836	0.228	0.00079	0.1	10.396	CM specific ATAC	KCNH2	KCNH2	distance	0.345	0.058	23587	chr7:150648803-150677929	chr7:150651609-150652539	NA	NA	NA
rs2269001	7	150651816	A	G	836	0.228	0.00079	0.1	10.396	CM specific ATAC	KCNH2	ATG9B	distance	0.043	0.023	69770	chr7:150648803-150677929	chr7:150651609-150652539	NA	NA	NA
rs34657537	7	150657808	A	G	836	0.103	0.00079	0.045	9.993	CM specific ATAC	KCNH2	KCNH2	nearby20kb	0.345	0.103	17595	chr7:150648803-150677929	chr7:150657473-150657938	NA	NA	NA
rs3807376	7	150658199	C	T	836	0.107	0.00079	0.047	10.217	CM specific ATAC	KCNH2	KCNH2	nearby20kb	0.345	0.107	17204	chr7:150648803-150677929	chr7:150657996-150658457	NA	NA	NA
rs35620480	8	11499908	C	A	857	0.96	0.00189	0.217	8.288	CM non-DA ATAC/Conserved	GATA4	BLK	distance	0.058	0.057	148398	chr8:11498892-11500862	chr8:11499151-11500640	NA	NA	NA
rs35620480	8	11499908	C	A	857	0.96	0.00189	0.217	8.288	CM non-DA ATAC/Conserved	GATA4	GATA4	distance	0.57	0.554	34560	chr8:11498892-11500862	chr8:11499151-11500640	NA	NA	NA
rs35620480	8	11499908	C	A	857	0.96	0.00189	0.217	8.288	CM non-DA ATAC/Conserved	GATA4	C8orf49	distance	0.105	0.102	118988	chr8:11498892-11500862	chr8:11499151-11500640	NA	NA	NA
rs35620480	8	11499908	C	A	857	0.96	0.00189	0.217	8.288	CM non-DA ATAC/Conserved	GATA4	NEIL2	distance	0.089	0.087	127240	chr8:11498892-11500862	chr8:11499151-11500640	NA	NA	NA
rs35620480	8	11499908	C	A	857	0.96	0.00189	0.217	8.288	CM non-DA ATAC/Conserved	GATA4	FDFT1	distance	0.054	0.052	153174	chr8:11498892-11500862	chr8:11499151-11500640	NA	NA	NA
rs35620480	8	11499908	C	A	857	0.96	0.00189	0.217	8.288	CM non-DA ATAC/Conserved	GATA4	FAM167A	distance	0.04	0.039	167684	chr8:11498892-11500862	chr8:11499151-11500640	NA	NA	NA
rs35620480	8	11499908	C	A	857	0.96	0.00189	0.217	8.288	CM non-DA ATAC/Conserved	GATA4	RP11-297N6.4	distance	0.046	0.045	160169	chr8:11498892-11500862	chr8:11499151-11500640	NA	NA	NA
rs478420	8	17792853	G	A	861	0.049	1.94e-05	0.049	12.482	Unannotated	PCM1	PCM1	distance	0.498	0.025	12504	NA	NA	NA	NA	NA
rs208757	8	17809791	G	A	861	0.926	1.94e-05	0.935	13.768	Unannotated	PCM1	PCM1	distance	0.498	0.459	29442	NA	NA	NA	ASAH1	NA
rs208757	8	17809791	G	A	861	0.926	1.94e-05	0.935	13.768	Unannotated	PCM1	MTUS1	distance	0.044	0.04	151365	NA	NA	NA	ASAH1	NA
rs208757	8	17809791	G	A	861	0.926	1.94e-05	0.935	13.768	Unannotated	PCM1	FGL1	distance	0.385	0.357	41917	NA	NA	NA	ASAH1	NA
rs208757	8	17809791	G	A	861	0.926	1.94e-05	0.935	13.768	Unannotated	PCM1	ASAH1	distance	1.061	0.058	132703	NA	NA	NA	ASAH1	NA
rs7508	8	17913970	G	A	862	1	0.0294	1	20.772	CM specific ATAC/Coding/eQTL	ASAH1	ASAH1	exons	1.061	1	28524	chr8:17909910-17916244	NA	NA	PCM1;ASAH1	NA
rs7846485	8	21803735	A	C	865	0.051	1.94e-05	0.07	9.278	Unannotated	XPO7	FGF17	pcHiC	0.142	0.051	96174	NA	NA	NA	NA	NA
rs6998692	8	21805265	C	T	865	0.194	6.95e-05	0.074	9.268	Conserved	XPO7	XPO7	distance	0.196	0.06	28085	NA	NA	NA	NA	NA
rs6998692	8	21805265	C	T	865	0.194	6.95e-05	0.074	9.268	Conserved	XPO7	NPM2	distance	0.131	0.023	76371	NA	NA	NA	NA	NA
rs6998692	8	21805265	C	T	865	0.194	6.95e-05	0.074	9.268	Conserved	XPO7	DOK2	distance	0.175	0.053	33894	NA	NA	NA	NA	NA
rs17060685	8	21830295	G	A	865	0.183	6.95e-05	0.07	9.246	Conserved	NPM2	XPO7	distance	0.196	0.034	53115	NA	NA	NA	NA	NA
rs17060685	8	21830295	G	A	865	0.183	6.95e-05	0.07	9.246	Conserved	NPM2	NPM2	distance	0.131	0.036	51341	NA	NA	NA	NA	NA
rs17060685	8	21830295	G	A	865	0.183	6.95e-05	0.07	9.246	Conserved	NPM2	FGF17	distance	0.142	0.025	69614	NA	NA	NA	NA	NA
rs17060685	8	21830295	G	A	865	0.183	6.95e-05	0.07	9.246	Conserved	NPM2	DMTN	distance	0.152	0.022	76211	NA	NA	NA	NA	NA
rs17060685	8	21830295	G	A	865	0.183	6.95e-05	0.07	9.246	Conserved	NPM2	DOK2	distance	0.175	0.031	58924	NA	NA	NA	NA	NA
rs2306642	8	21839020	C	T	865	0.023	1.94e-05	0.031	8.992	Unannotated	NPM2	DMTN	pcHiC	0.152	0.023	67486	NA	NA	NA	NA	NA
rs2306643	8	21839093	G	T	865	0.025	1.94e-05	0.035	9.04	Unannotated	NPM2	DMTN	pcHiC	0.152	0.025	67413	NA	NA	NA	NA	NA
rs7843147	8	21839668	A	G	865	0.024	1.94e-05	0.033	8.888	Unannotated	NPM2	DMTN	pcHiC	0.152	0.024	66838	NA	NA	NA	NA	NA
rs3943207	8	21845619	T	G	865	0.043	1.94e-05	0.059	9.16	Unannotated	NPM2	REEP4	pcHiC	0.075	0.043	153845	NA	NA	NA	NA	NA
rs62521284	8	124548626	G	A	922	0.179	0.000529	0.059	17.316	CM non-DA ATAC	FBXO32	FBXO32	nearby20kb	0.372	0.09	4820	chr8:124509462-124555256	chr8:124548257-124549135	NA	NA	NA
rs62521284	8	124548626	G	A	922	0.179	0.000529	0.059	17.316	CM non-DA ATAC	FBXO32	FAM91A1	pcHiC	0.338	0.09	232070	chr8:124509462-124555256	chr8:124548257-124549135	NA	NA	NA
rs77114030	8	124551122	A	G	922	0.068	0.000329	0.036	17.22	CM shared ATAC	FBXO32	FBXO32	nearby20kb	0.372	0.034	2324	chr8:124509462-124555256	chr8:124550778-124551214	NA	NA	NA
rs77114030	8	124551122	A	G	922	0.068	0.000329	0.036	17.22	CM shared ATAC	FBXO32	KLHL38	pcHiC	0.284	0.034	114068	chr8:124509462-124555256	chr8:124550778-124551214	NA	NA	NA
rs62521286	8	124551975	G	A	922	0.049	1.94e-05	0.446	18.347	Unannotated	FBXO32	KLHL38	pcHiC	0.284	0.025	113215	chr8:124509462-124555256	chr8:124551612-124553022	NA	NA	NA
rs62521286	8	124551975	G	A	922	0.049	1.94e-05	0.446	18.347	Unannotated	FBXO32	FAM91A1	pcHiC	0.338	0.025	228721	chr8:124509462-124555256	chr8:124551612-124553022	NA	NA	NA
rs62521287	8	124552133	T	C	922	0.669	0.00079	0.149	17.757	CM specific ATAC	FBXO32	FBXO32	nearby20kb	0.372	0.223	1313	chr8:124509462-124555256	chr8:124551612-124553022	NA	NA	NA
rs62521287	8	124552133	T	C	922	0.669	0.00079	0.149	17.757	CM specific ATAC	FBXO32	KLHL38	pcHiC	0.284	0.223	113057	chr8:124509462-124555256	chr8:124551612-124553022	NA	NA	NA
rs62521287	8	124552133	T	C	922	0.669	0.00079	0.149	17.757	CM specific ATAC	FBXO32	FAM91A1	pcHiC	0.338	0.223	228563	chr8:124509462-124555256	chr8:124551612-124553022	NA	NA	NA
rs13268978	8	141679385	C	T	934	0.083	0.000529	0.012	8.303	CM non-DA ATAC	AGO2	DENND3	pcHiC	0.544	0.083	447992	chr8:141678716-141680545	NA	NA	NA	NA
rs10283368	8	141679817	T	C	934	0.443	0.00282	0.012	8.273	CM specific ATAC/Conserved	AGO2	DENND3	pcHiC	0.544	0.443	447560	chr8:141678716-141680545	chr8:141679648-141680200	NA	NA	NA
rs13278258	8	141685774	A	G	934	0.056	0.00079	0.006	7.934	CM specific ATAC	AGO2	AGO2	distance	0.244	0.05	40056	chr8:141682437-141688982	chr8:141685644-141686161	NA	NA	NA
rs13268718	8	141687200	T	G	934	0.023	0.00079	0.002	7.533	CM specific ATAC	AGO2	PTK2	pcHiC	0.181	0.023	325115	chr8:141682437-141688982	NA	NA	NA	NA
rs10089107	8	141698451	T	C	934	0.074	0.00079	0.007	8.026	CM specific ATAC	AGO2	AGO2	distance	0.244	0.066	52733	chr8:141697263-141699271	chr8:141697969-141698753	NA	NA	NA
rs2166869	8	141960578	T	C	934	0.026	0.000529	0.004	7.891	CM non-DA ATAC	PTK2	PTK2	distance	0.181	0.023	51737	NA	NA	NA	NA	NA
rs10821415	9	97713459	A	C	984	0.965	0.00079	0.511	33.534	CM specific ATAC	C9orf3	C9orf3	distance	0.759	0.738	224476	chr9:97710689-97716316	chr9:97712118-97714357	NA	NA	FOXJ3 - strong,FOXL1 - strong,FOXO4 - strong,IRF9 - strong
rs10821415	9	97713459	A	C	984	0.965	0.00079	0.511	33.534	CM specific ATAC	C9orf3	FBP2	distance	0.053	0.052	357384	chr9:97710689-97716316	chr9:97712118-97714357	NA	NA	FOXJ3 - strong,FOXL1 - strong,FOXO4 - strong,IRF9 - strong
rs10821415	9	97713459	A	C	984	0.965	0.00079	0.511	33.534	CM specific ATAC	C9orf3	FBP1	distance	0.135	0.131	310928	chr9:97710689-97716316	chr9:97712118-97714357	NA	NA	FOXJ3 - strong,FOXL1 - strong,FOXO4 - strong,IRF9 - strong
rs10821415	9	97713459	A	C	984	0.965	0.00079	0.511	33.534	CM specific ATAC	C9orf3	FANCC	distance	0.051	0.043	366532	chr9:97710689-97716316	chr9:97712118-97714357	NA	NA	FOXJ3 - strong,FOXL1 - strong,FOXO4 - strong,IRF9 - strong
rs1886296	9	139092280	A	G	1009	0.048	1.94e-05	0.067	8.601	Unannotated	LHX3	GPSM1	pcHiC	0.074	0.048	129652	NA	NA	NA	NA	NA
rs2274115	9	139094773	A	G	1009	0.612	1.94e-05	0.854	9.772	Unannotated	LHX3	GPSM1	distance	0.074	0.024	127159	NA	NA	NA	NA	NA
rs2274115	9	139094773	A	G	1009	0.612	1.94e-05	0.854	9.772	Unannotated	LHX3	NACC2	distance	0.038	0.036	107642	NA	NA	NA	NA	NA
rs2274115	9	139094773	A	G	1009	0.612	1.94e-05	0.854	9.772	Unannotated	LHX3	C9orf69	distance	0.061	0.057	84042	NA	NA	NA	NA	NA
rs2274115	9	139094773	A	G	1009	0.612	1.94e-05	0.854	9.772	Unannotated	LHX3	LHX3	distance	0.605	0.294	2182	NA	NA	NA	NA	NA
rs2274115	9	139094773	A	G	1009	0.612	1.94e-05	0.854	9.772	Unannotated	LHX3	QSOX2	distance	0.144	0.13	42914	NA	NA	NA	NA	NA
rs2274115	9	139094773	A	G	1009	0.612	1.94e-05	0.854	9.772	Unannotated	LHX3	DKFZP434A062	distance	0.027	0.025	124867	NA	NA	NA	NA	NA
rs11103378	9	139097205	T	C	1009	0.274	0.00079	0.009	7.834	CM specific ATAC	LHX3	LHX3	active.promoters	0.605	0.274	250	NA	NA	NA	NA	NA
rs4595427	10	65012944	C	A	1052	0.223	0.00079	0.009	10.93	CM specific ATAC	NRBF2	NRBF2	distance	0.28	0.182	119894	chr10:65012176-65012973	NA	NA	NA	NA
rs4595427	10	65012944	C	A	1052	0.223	0.00079	0.009	10.93	CM specific ATAC	NRBF2	JMJD1C	distance	0.397	0.028	212778	chr10:65012176-65012973	NA	NA	NA	NA
rs10761766	10	65190327	A	G	1052	0.084	0.000329	0.009	10.966	CM shared ATAC	JMJD1C	REEP3	distance	0.318	0.021	90796	chr10:65188113-65190868	chr10:65190147-65190419	NA	NA	NA
rs10761766	10	65190327	A	G	1052	0.084	0.000329	0.009	10.966	CM shared ATAC	JMJD1C	JMJD1C	distance	0.397	0.063	35395	chr10:65188113-65190868	chr10:65190147-65190419	NA	NA	NA
rs7075901	10	65280994	A	C	1052	0.047	0.000329	0.005	10.681	CM shared ATAC	REEP3	REEP3	active.promoters	0.318	0.047	129	chr10:65279383-65284914	chr10:65280382-65282357	NA	NA	NA
rs2393984	10	65314971	G	A	1052	0.036	6.95e-05	0.018	11.475	Conserved	REEP3	REEP3	distance	0.318	0.027	33848	NA	NA	NA	NA	NA
rs2273771	10	69597786	A	G	1054	0.135	0.000299	0.019	7.034	CM shared ATAC/Coding	DNAJC12	DNAJC12	exons	0.212	0.135	138	chr10:69597676-69597994	NA	chr10:69597728-69597928	NA	NA
rs3740053	10	69644335	G	A	1054	0.135	0.00117	0.005	6.347	CM shared ATAC/Conserved	SIRT1	SIRT1	active.promoters	0.313	0.135	92	chr10:69643185-69646253	chr10:69643674-69645451	NA	NA	NA
rs2273773	10	69666598	C	T	1054	0.024	6.31e-05	0.016	6.931	Coding/Conserved	SIRT1	SIRT1	exons	0.313	0.024	22171	NA	NA	NA	NA	NA
rs1490008	10	69834455	G	A	1054	0.085	0.000329	0.011	6.714	CM shared ATAC	HERC4	HERC4	ABC,nearby20kb	0.212	0.028	650	chr10:69833362-69835810	chr10:69833723-69835661	NA	NA	NA
rs1490008	10	69834455	G	A	1054	0.085	0.000329	0.011	6.714	CM shared ATAC	HERC4	HNRNPH3	pcHiC	0.029	0.028	256476	chr10:69833362-69835810	chr10:69833723-69835661	NA	NA	NA
rs1490008	10	69834455	G	A	1054	0.085	0.000329	0.011	6.714	CM shared ATAC	HERC4	PBLD	pcHiC	0.029	0.028	258351	chr10:69833362-69835810	chr10:69833723-69835661	NA	NA	NA
rs10740282	10	69848937	T	C	1054	0.152	0.00079	0.008	6.576	CM specific ATAC	HERC4	HERC4	nearby20kb	0.212	0.076	13832	chr10:69845661-69849488	NA	NA	NA	NA
rs10740282	10	69848937	T	C	1054	0.152	0.00079	0.008	6.576	CM specific ATAC	HERC4	MYPN	nearby20kb	0.169	0.076	16975	chr10:69845661-69849488	NA	NA	NA	NA
rs10823138	10	69868675	A	G	1054	0.033	0.00079	0.002	5.94	CM specific ATAC	MYPN	MYPN	nearby20kb	0.169	0.033	2763	chr10:69867563-69873537	NA	NA	NA	NA
rs60632610	10	75415677	T	C	1058	0.971	0.00256	0.23	33.635	CM specific ATAC/Coding/Conserved	SYNPO2L	SYNPO2L	exons	1.113	0.971	7884	chr10:75403582-75418333	chr10:75415582-75416245	NA	FUT11	NA
rs147790633	10	75447582	C	T	1059	0.144	1.94e-05	0.195	30.205	Unannotated	AGAP5	SYNPO2L	distance	1.113	0.027	24021	NA	NA	NA	NA	NA
rs147790633	10	75447582	C	T	1059	0.144	1.94e-05	0.195	30.205	Unannotated	AGAP5	AGAP5	distance	0.167	0.035	10057	NA	NA	NA	NA	NA
rs76192127	10	75462510	C	T	1059	0.493	1.94e-05	0.667	30.775	Unannotated	AGAP5	SEC24C	distance	0.1	0.061	41610	NA	NA	NA	NA	NA
rs76192127	10	75462510	C	T	1059	0.493	1.94e-05	0.667	30.775	Unannotated	AGAP5	FUT11	distance	0.074	0.035	69539	NA	NA	NA	NA	NA
rs76192127	10	75462510	C	T	1059	0.493	1.94e-05	0.667	30.775	Unannotated	AGAP5	CHCHD1	distance	0.042	0.029	79295	NA	NA	NA	NA	NA
rs76192127	10	75462510	C	T	1059	0.493	1.94e-05	0.667	30.775	Unannotated	AGAP5	ZSWIM8	distance	0.13	0.027	82830	NA	NA	NA	NA	NA
rs76192127	10	75462510	C	T	1059	0.493	1.94e-05	0.667	30.775	Unannotated	AGAP5	USP54	distance	0.047	0.03	76799	NA	NA	NA	NA	NA
rs76192127	10	75462510	C	T	1059	0.493	1.94e-05	0.667	30.775	Unannotated	AGAP5	MYOZ1	distance	0.065	0.041	60995	NA	NA	NA	NA	NA
rs76192127	10	75462510	C	T	1059	0.493	1.94e-05	0.667	30.775	Unannotated	AGAP5	SYNPO2L	distance	1.113	0.064	38949	NA	NA	NA	NA	NA
rs76192127	10	75462510	C	T	1059	0.493	1.94e-05	0.667	30.775	Unannotated	AGAP5	AGAP5	distance	0.167	0.127	4871	NA	NA	NA	NA	NA
rs76192127	10	75462510	C	T	1059	0.493	1.94e-05	0.667	30.775	Unannotated	AGAP5	AC022400.2	distance	0.198	0.035	69868	NA	NA	NA	NA	NA
rs11000772	10	75533988	G	T	1059	0.076	0.000529	0.004	28.214	CM non-DA ATAC	AC022400.2	AC022400.2	active.promoters	0.198	0.076	1610	chr10:75530745-75534377	NA	NA	NA	NA
rs11000773	10	75534115	T	G	1059	0.076	0.000529	0.004	28.211	CM non-DA ATAC	AC022400.2	AC022400.2	active.promoters	0.198	0.076	1737	chr10:75530745-75534377	chr10:75534112-75534161	NA	NA	NA
rs79936644	10	75545117	T	C	1059	0.084	0.000329	0.007	28.421	CM shared ATAC	ZSWIM8	ZSWIM8	active.promoters	0.13	0.084	223	chr10:75544449-75546538	chr10:75544974-75546233	NA	NA	NA
rs9664049	10	104000307	C	T	1075	0.578	0.00282	0.012	11.011	CM specific ATAC/Conserved	PITX3	ELOVL3	nearby20kb	0.178	0.145	14222	chr10:104000125-104002098	NA	NA	PITX3	NA
rs9664049	10	104000307	C	T	1075	0.578	0.00282	0.012	11.011	CM specific ATAC/Conserved	PITX3	PITX3	nearby20kb	0.277	0.145	924	chr10:104000125-104002098	NA	NA	PITX3	NA
rs9664049	10	104000307	C	T	1075	0.578	0.00282	0.012	11.011	CM specific ATAC/Conserved	PITX3	GBF1	nearby20kb	0.195	0.145	4982	chr10:104000125-104002098	NA	NA	PITX3	NA
rs9664049	10	104000307	C	T	1075	0.578	0.00282	0.012	11.011	CM specific ATAC/Conserved	PITX3	NFKB2	pcHiC	0.196	0.145	153560	chr10:104000125-104002098	NA	NA	PITX3	NA
rs3781295	10	104140602	A	G	1075	0.111	1.94e-05	0.33	12.265	Unannotated	NFKB2	NFKB2	distance	0.196	0.03	13265	NA	NA	NA	PITX3	NA
rs60469668	10	105331866	G	A	1076	0.103	1.94e-05	0.103	63.155	Unannotated	NEURL	NEURL	distance	0.257	0.033	78130	NA	NA	NA	NA	NA
rs60469668	10	105331866	G	A	1076	0.103	1.94e-05	0.103	63.155	Unannotated	NEURL	CALHM3	distance	0.192	0.024	92869	NA	NA	NA	NA	NA
rs12411463	10	105333613	T	C	1076	0.187	1.94e-05	0.188	63.451	Unannotated	NEURL	CALHM2	pcHiC	0.301	0.187	120953	NA	NA	NA	NA	NA
rs11598047	10	105342672	G	A	1076	0.702	1.94e-05	0.702	65.048	Unannotated	NEURL	PDCD11	distance	0.037	0.032	186267	NA	NA	NA	NA	NA
rs11598047	10	105342672	G	A	1076	0.702	1.94e-05	0.702	65.048	Unannotated	NEURL	NEURL	distance	0.257	0.222	88936	NA	NA	NA	NA	NA
rs11598047	10	105342672	G	A	1076	0.702	1.94e-05	0.702	65.048	Unannotated	NEURL	USMG5	distance	0.037	0.032	186449	NA	NA	NA	NA	NA
rs11598047	10	105342672	G	A	1076	0.702	1.94e-05	0.702	65.048	Unannotated	NEURL	CALHM2	distance	0.301	0.098	130012	NA	NA	NA	NA	NA
rs11598047	10	105342672	G	A	1076	0.702	1.94e-05	0.702	65.048	Unannotated	NEURL	CALHM1	distance	0.127	0.11	124027	NA	NA	NA	NA	NA
rs11598047	10	105342672	G	A	1076	0.702	1.94e-05	0.702	65.048	Unannotated	NEURL	CALHM3	distance	0.192	0.165	103675	NA	NA	NA	NA	NA
rs12260801	10	112574402	T	C	1080	0.25	1.94e-05	0.255	7.532	Unannotated	PDCD4	PDCD4	distance	0.516	0.13	57163	chr10:112571369-112591572	NA	NA	NA	NA
rs12260801	10	112574402	T	C	1080	0.25	1.94e-05	0.255	7.532	Unannotated	PDCD4	SHOC2	distance	0.199	0.05	104899	chr10:112571369-112591572	NA	NA	NA	NA
rs12260801	10	112574402	T	C	1080	0.25	1.94e-05	0.255	7.532	Unannotated	PDCD4	BBIP1	distance	0.2	0.05	104630	chr10:112571369-112591572	NA	NA	NA	NA
rs10749053	10	112576695	T	C	1080	0.723	1.94e-05	0.736	7.979	Unannotated	PDCD4	RBM20	distance	0.051	0.036	172540	chr10:112571369-112591572	NA	NA	NA	NA
rs10749053	10	112576695	T	C	1080	0.723	1.94e-05	0.736	7.979	Unannotated	PDCD4	PDCD4	distance	0.516	0.379	54870	chr10:112571369-112591572	NA	NA	NA	NA
rs10749053	10	112576695	T	C	1080	0.723	1.94e-05	0.736	7.979	Unannotated	PDCD4	SHOC2	distance	0.199	0.146	102606	chr10:112571369-112591572	NA	NA	NA	NA
rs10749053	10	112576695	T	C	1080	0.723	1.94e-05	0.736	7.979	Unannotated	PDCD4	BBIP1	distance	0.2	0.146	102337	chr10:112571369-112591572	NA	NA	NA	NA
rs2403551	11	20008905	T	C	1109	0.065	0.00079	0.08	19.223	CM specific ATAC	DBX1	NAV2	pcHiC	0.066	0.065	636634	chr11:20007633-20012314	chr11:20008855-20009740	NA	NA	NA
rs10766613	11	20009209	T	C	1109	0.233	0.00282	0.08	19.218	CM specific ATAC/Conserved	DBX1	DBX1	distance	0.909	0.227	172950	chr11:20007633-20012314	chr11:20008855-20009740	NA	NA	NA
rs10766614	11	20009262	A	G	1109	0.065	0.00079	0.08	19.262	CM specific ATAC	DBX1	DBX1	distance	0.909	0.064	172897	chr11:20007633-20012314	chr11:20008855-20009740	NA	NA	NA
rs1442713	11	20010141	A	G	1109	0.093	0.00079	0.114	19.387	CM specific ATAC	DBX1	DBX1	distance	0.909	0.09	172018	chr11:20007633-20012314	chr11:20009801-20010631	NA	NA	NA
rs4757877	11	20010291	A	G	1109	0.471	0.00282	0.162	19.533	CM specific ATAC/Conserved	DBX1	DBX1	distance	0.909	0.458	171868	chr11:20007633-20012314	chr11:20009801-20010631	NA	NA	NA
rs2625322	11	20010351	A	G	1109	0.023	0.00079	0.028	19.143	CM specific ATAC	DBX1	DBX1	distance	0.909	0.022	171808	chr11:20007633-20012314	chr11:20009801-20010631	NA	NA	NA
rs1822273	11	20010513	G	A	1109	0.041	0.00079	0.051	19.033	CM specific ATAC	DBX1	DBX1	distance	0.909	0.04	171646	chr11:20007633-20012314	chr11:20009801-20010631	NA	NA	NA
rs7115520	11	121604656	C	T	1169	0.032	1.94e-05	0.033	7.592	Unannotated	SORL1	SORL1	distance	0.623	0.027	281744	NA	NA	NA	NA	NA
rs7115531	11	121604722	A	G	1169	0.04	1.94e-05	0.041	7.699	Unannotated	SORL1	SORL1	distance	0.623	0.034	281810	NA	NA	NA	NA	NA
rs949078	11	121629007	C	T	1169	0.037	1.94e-05	0.038	7.659	Unannotated	SORL1	SORL1	distance	0.623	0.027	306095	NA	NA	NA	NA	NA
rs4936650	11	121633917	A	G	1169	0.03	1.94e-05	0.031	7.572	Unannotated	SORL1	SORL1	distance	0.623	0.02	311005	NA	NA	NA	NA	NA
rs10790459	11	121638516	T	G	1169	0.061	3.9e-05	0.031	7.653	Non-CM ATAC	SORL1	SORL1	distance	0.623	0.039	315604	NA	NA	NA	NA	NA
rs10790459	11	121638516	T	G	1169	0.061	3.9e-05	0.031	7.653	Non-CM ATAC	SORL1	BLID	distance	0.35	0.02	348407	NA	NA	NA	NA	NA
rs7932733	11	121638961	G	A	1169	0.067	1.94e-05	0.07	8.022	Unannotated	SORL1	SORL1	distance	0.623	0.043	316049	NA	NA	NA	NA	NA
rs7932733	11	121638961	G	A	1169	0.067	1.94e-05	0.07	8.022	Unannotated	SORL1	BLID	distance	0.35	0.023	347962	NA	NA	NA	NA	NA
rs1944687	11	121639035	C	T	1169	0.038	1.94e-05	0.039	7.736	Unannotated	SORL1	SORL1	distance	0.623	0.024	316123	NA	NA	NA	NA	NA
rs1944686	11	121639057	G	A	1169	0.054	1.94e-05	0.056	7.935	Unannotated	SORL1	SORL1	distance	0.623	0.034	316145	NA	NA	NA	NA	NA
rs1944683	11	121641496	C	T	1169	0.078	1.94e-05	0.081	8.086	Unannotated	SORL1	SORL1	distance	0.623	0.048	318584	chr11:121641464-121642683	NA	NA	NA	NA
rs1944683	11	121641496	C	T	1169	0.078	1.94e-05	0.081	8.086	Unannotated	SORL1	BLID	distance	0.35	0.028	345427	chr11:121641464-121642683	NA	NA	NA	NA
rs1944682	11	121641790	G	T	1169	0.063	1.94e-05	0.065	8.002	Unannotated	SORL1	SORL1	distance	0.623	0.038	318878	chr11:121641464-121642683	NA	NA	NA	NA
rs1944682	11	121641790	G	T	1169	0.063	1.94e-05	0.065	8.002	Unannotated	SORL1	BLID	distance	0.35	0.023	345133	chr11:121641464-121642683	NA	NA	NA	NA
rs7108855	11	121642033	T	C	1169	0.09	1.94e-05	0.094	8.142	Unannotated	SORL1	SORL1	distance	0.623	0.055	319121	chr11:121641464-121642683	NA	NA	NA	NA
rs7108855	11	121642033	T	C	1169	0.09	1.94e-05	0.094	8.142	Unannotated	SORL1	BLID	distance	0.35	0.033	344890	chr11:121641464-121642683	NA	NA	NA	NA
rs2156664	11	121645005	T	C	1169	0.131	1.94e-05	0.136	8.307	Unannotated	SORL1	SORL1	distance	0.623	0.076	322093	NA	NA	NA	NA	NA
rs2156664	11	121645005	T	C	1169	0.131	1.94e-05	0.136	8.307	Unannotated	SORL1	BLID	distance	0.35	0.051	341918	NA	NA	NA	NA	NA
rs7121084	11	121646463	C	T	1169	0.041	1.94e-05	0.042	7.808	Unannotated	SORL1	SORL1	distance	0.623	0.023	323551	NA	NA	NA	NA	NA
rs1944678	11	121646580	C	A	1169	0.047	1.94e-05	0.048	7.843	Unannotated	SORL1	SORL1	distance	0.623	0.027	323668	NA	NA	NA	NA	NA
rs7946552	11	121654327	G	A	1169	0.122	1.94e-05	0.126	8.196	Unannotated	SORL1	SORL1	distance	0.623	0.06	331415	NA	NA	NA	NA	NA
rs7946552	11	121654327	G	A	1169	0.122	1.94e-05	0.126	8.196	Unannotated	SORL1	BLID	distance	0.35	0.059	332596	NA	NA	NA	NA	NA
rs76097649	11	128764570	A	G	1175	0.509	0.00079	0.459	19.9	CM specific ATAC	KCNJ5	KCNJ5	ABC,nearby20kb	0.5	0.255	3319	chr11:128760056-128766483	chr11:128762718-128765963	NA	C11orf45	PRDM1 - strong
rs76097649	11	128764570	A	G	1175	0.509	0.00079	0.459	19.9	CM specific ATAC	KCNJ5	C11orf45	ABC,nearby20kb	0.5	0.255	11360	chr11:128760056-128766483	chr11:128762718-128765963	NA	C11orf45	PRDM1 - strong
rs75190942	11	128764571	A	C	1175	0.408	0.00079	0.368	19.836	CM specific ATAC	KCNJ5	KCNJ5	ABC,nearby20kb	0.5	0.204	3320	chr11:128760056-128766483	chr11:128762718-128765963	NA	C11orf45	NA
rs75190942	11	128764571	A	C	1175	0.408	0.00079	0.368	19.836	CM specific ATAC	KCNJ5	C11orf45	ABC,nearby20kb	0.5	0.204	11359	chr11:128760056-128766483	chr11:128762718-128765963	NA	C11orf45	NA
rs113223494	11	128768852	A	G	1175	0.057	0.00079	0.052	18.884	CM specific ATAC	C11orf45	KCNJ5	nearby20kb	0.5	0.029	7601	chr11:128768125-128769082	NA	NA	C11orf45	NA
rs113223494	11	128768852	A	G	1175	0.057	0.00079	0.052	18.884	CM specific ATAC	C11orf45	C11orf45	nearby20kb	0.5	0.029	7078	chr11:128768125-128769082	NA	NA	C11orf45	NA
rs34219605	12	24760456	G	A	1196	0.033	1.94e-05	0.033	23.997	Unannotated	AC026310.1	AC026310.1	distance	0.61	0.02	294787	NA	NA	NA	NA	NA
rs11047527	12	24762501	C	A	1196	0.079	1.94e-05	0.079	24.206	Unannotated	AC026310.1	AC026310.1	distance	0.61	0.048	292742	NA	NA	NA	NA	NA
rs17287293	12	24770878	G	A	1196	0.041	1.94e-05	0.041	24.11	Unannotated	AC026310.1	AC026310.1	distance	0.61	0.025	284365	NA	NA	NA	NA	NA
rs10842383	12	24771967	T	C	1196	0.121	1.94e-05	0.121	24.541	Unannotated	AC026310.1	AC026310.1	distance	0.61	0.074	283276	NA	NA	NA	NA	NA
rs10842383	12	24771967	T	C	1196	0.121	1.94e-05	0.121	24.541	Unannotated	AC026310.1	BCAT1	distance	0.237	0.029	330426	NA	NA	NA	NA	NA
rs12829213	12	24773562	A	G	1196	0.063	1.94e-05	0.063	24.181	Unannotated	AC026310.1	AC026310.1	distance	0.61	0.039	281681	NA	NA	NA	NA	NA
rs112630705	12	24773919	A	G	1196	0.087	1.94e-05	0.087	24.386	Unannotated	AC026310.1	AC026310.1	distance	0.61	0.053	281324	NA	NA	NA	NA	NA
rs112630705	12	24773919	A	G	1196	0.087	1.94e-05	0.087	24.386	Unannotated	AC026310.1	BCAT1	distance	0.237	0.021	328474	NA	NA	NA	NA	NA
rs11610461	12	24774691	G	A	1196	0.094	1.94e-05	0.094	24.731	Unannotated	AC026310.1	AC026310.1	distance	0.61	0.057	280552	NA	NA	NA	NA	NA
rs11610461	12	24774691	G	A	1196	0.094	1.94e-05	0.094	24.731	Unannotated	AC026310.1	BCAT1	distance	0.237	0.022	327702	NA	NA	NA	NA	NA
rs137913153	12	24776752	G	A	1196	0.097	1.94e-05	0.097	24.448	Unannotated	AC026310.1	AC026310.1	distance	0.61	0.059	278491	NA	NA	NA	NA	NA
rs137913153	12	24776752	G	A	1196	0.097	1.94e-05	0.097	24.448	Unannotated	AC026310.1	BCAT1	distance	0.237	0.023	325641	NA	NA	NA	NA	NA
rs4963776	12	24779491	T	G	1196	0.094	1.94e-05	0.094	24.735	Unannotated	AC026310.1	AC026310.1	distance	0.61	0.057	275752	NA	NA	NA	NA	NA
rs4963776	12	24779491	T	G	1196	0.094	1.94e-05	0.094	24.735	Unannotated	AC026310.1	BCAT1	distance	0.237	0.022	322902	NA	NA	NA	NA	NA
rs11047539	12	24781446	G	A	1196	0.097	1.94e-05	0.097	24.511	Unannotated	AC026310.1	AC026310.1	distance	0.61	0.059	273797	NA	NA	NA	NA	NA
rs11047539	12	24781446	G	A	1196	0.097	1.94e-05	0.097	24.511	Unannotated	AC026310.1	BCAT1	distance	0.237	0.023	320947	NA	NA	NA	NA	NA
rs4246224	12	24784139	A	G	1196	0.121	1.94e-05	0.121	24.528	Unannotated	AC026310.1	AC026310.1	distance	0.61	0.074	271104	NA	NA	NA	NA	NA
rs4246224	12	24784139	A	G	1196	0.121	1.94e-05	0.121	24.528	Unannotated	AC026310.1	BCAT1	distance	0.237	0.029	318254	NA	NA	NA	NA	NA
rs11047543	12	24788339	A	G	1196	0.051	1.94e-05	0.051	24.132	Unannotated	AC026310.1	AC026310.1	distance	0.61	0.031	266904	NA	NA	NA	NA	NA
rs17380837	12	26345526	T	C	1197	0.16	1.94e-05	0.641	11.319	Unannotated	BHLHE41	SSPN	distance	0.896	0.076	70602	NA	NA	NA	SSPN	NA
rs17380837	12	26345526	T	C	1197	0.16	1.94e-05	0.641	11.319	Unannotated	BHLHE41	BHLHE41	distance	0.1	0.081	67466	NA	NA	NA	SSPN	NA
rs58747679	12	26348304	C	T	1197	0.802	0.000299	0.209	10.853	CM shared ATAC/Coding	BHLHE41	SSPN	ABC	0.896	0.802	73380	chr12:26347577-26352860	chr12:26347964-26349932	NA	SSPN	NA
rs12809354	12	32978437	C	T	1201	0.771	0.00079	0.73	13.54	CM specific ATAC	YARS2	PKP2	pcHiC	0.992	0.771	71337	chr12:32970419-32984124	NA	NA	NA	NA
rs2045172	12	32980161	T	G	1201	0.211	0.00079	0.2	13.183	CM specific ATAC	PKP2	PKP2	pcHiC	0.992	0.211	69613	chr12:32970419-32984124	chr12:32979717-32980620	chr12:32980078-32980278	NA	NA
rs7978685	12	57103154	T	C	1214	0.111	1.94e-05	0.159	11.827	Unannotated	PTGES3	PTGES3	distance	0.094	0.026	20995	NA	NA	NA	NACA	NA
rs7978685	12	57103154	T	C	1214	0.111	1.94e-05	0.159	11.827	Unannotated	PTGES3	NACA	distance	0.178	0.026	22258	NA	NA	NA	NACA	NA
rs2860482	12	57105938	A	C	1214	0.146	1.94e-05	0.21	11.917	Unannotated	NACA	HSD17B6	distance	0.072	0.024	40007	NA	NA	NA	NACA	NA
rs2860482	12	57105938	A	C	1214	0.146	1.94e-05	0.21	11.917	Unannotated	NACA	PTGES3	distance	0.094	0.033	23779	NA	NA	NA	NACA	NA
rs2860482	12	57105938	A	C	1214	0.146	1.94e-05	0.21	11.917	Unannotated	NACA	NACA	distance	0.178	0.036	19474	NA	NA	NA	NACA	NA
rs2860482	12	57105938	A	C	1214	0.146	1.94e-05	0.21	11.917	Unannotated	NACA	PRIM1	distance	0.075	0.024	40219	NA	NA	NA	NACA	NA
rs2958149	12	57109792	A	G	1214	0.329	6.31e-05	0.146	11.902	Coding/Conserved	NACA	STAT6	pcHiC	0.35	0.329	416130	NA	NA	NA	NACA	NA
rs3214051	12	57119236	G	A	1214	0.072	0.00107	0.002	9.854	CM shared ATAC/Coding/Conserved	NACA	NACA	exons	0.178	0.072	6176	chr12:57114331-57120695	chr12:57118244-57119685	NA	NACA	NA
rs7313074	12	57154489	G	A	1214	0.064	1.94e-05	0.093	11.526	Unannotated	PRIM1	TAC3	pcHiC	0.022	0.021	268178	NA	NA	NA	NACA	NA
rs7313074	12	57154489	G	A	1214	0.064	1.94e-05	0.093	11.526	Unannotated	PRIM1	STAT6	pcHiC	0.35	0.021	371433	NA	NA	NA	NACA	NA
rs7313074	12	57154489	G	A	1214	0.064	1.94e-05	0.093	11.526	Unannotated	PRIM1	LRP1	pcHiC	0.081	0.021	367787	NA	NA	NA	NACA	NA
rs4759256	12	57155256	A	C	1214	0.059	1.94e-05	0.085	11.462	Unannotated	PRIM1	LRP1	pcHiC	0.081	0.059	367020	NA	NA	NA	NACA	NA
rs71454237	12	70013415	A	G	1222	0.893	1.94e-05	0.967	12.749	Unannotated	LRRC10	FRS2	distance	0.032	0.026	149286	chr12:70013015-70014219	NA	NA	NA	NA
rs71454237	12	70013415	A	G	1222	0.893	1.94e-05	0.967	12.749	Unannotated	LRRC10	CCT2	distance	0.318	0.258	34301	chr12:70013015-70014219	NA	NA	NA	NA
rs71454237	12	70013415	A	G	1222	0.893	1.94e-05	0.967	12.749	Unannotated	LRRC10	RAB3IP	distance	0.052	0.047	119046	chr12:70013015-70014219	NA	NA	NA	NA
rs71454237	12	70013415	A	G	1222	0.893	1.94e-05	0.967	12.749	Unannotated	LRRC10	LRRC10	distance	0.462	0.432	8473	chr12:70013015-70014219	NA	NA	NA	NA
rs71454237	12	70013415	A	G	1222	0.893	1.94e-05	0.967	12.749	Unannotated	LRRC10	BEST3	distance	0.107	0.104	79841	chr12:70013015-70014219	NA	NA	NA	NA
rs12426679	12	76237987	C	T	1225	0.041	1.94e-05	0.237	8.306	Unannotated	PHLDA1	PHLDA1	distance	0.685	0.028	189725	NA	NA	NA	NA	NA
rs1565765	12	76238855	C	T	1225	0.858	0.000529	0.184	8.215	CM non-DA ATAC	PHLDA1	KRR1	distance	0.039	0.033	333439	NA	chr12:76238837-76239374	NA	NA	NA
rs1565765	12	76238855	C	T	1225	0.858	0.000529	0.184	8.215	CM non-DA ATAC	PHLDA1	PHLDA1	distance	0.685	0.588	188857	NA	chr12:76238837-76239374	NA	NA	NA
rs1565765	12	76238855	C	T	1225	0.858	0.000529	0.184	8.215	CM non-DA ATAC	PHLDA1	NAP1L1	distance	0.246	0.212	239958	NA	chr12:76238837-76239374	NA	NA	NA
rs7977083	12	114790500	A	G	1248	0.024	1.94e-05	0.047	38.401	Unannotated	TBX5	TBX5	distance	0.997	0.024	55747	NA	chr12:114790449-114790515	NA	NA	NA
rs883079	12	114793240	C	T	1248	0.194	1.77e-05	0.411	39.547	Coding	TBX5	TBX5	exons	0.997	0.194	53007	chr12:114793168-114793694	chr12:114793186-114794129	NA	NA	NA
rs10507248	12	114797093	G	T	1248	0.088	1.94e-05	0.169	38.559	Unannotated	TBX5	TBX5	pcHiC	0.997	0.088	49154	NA	NA	NA	NA	NA
rs7955405	12	114797306	A	G	1248	0.126	1.94e-05	0.241	38.696	Unannotated	TBX5	TBX5	pcHiC	0.997	0.126	48941	NA	NA	NA	NA	NA
rs7312625	12	114799974	G	A	1248	0.511	0.00079	0.024	37.981	CM specific ATAC	TBX5	TBX5	distance	0.997	0.509	46273	chr12:114798900-114800728	chr12:114799794-114800150	chr12:114799905-114800105	NA	NA
rs3896871	12	123333610	G	T	1254	0.06	0.00079	0.011	6.922	CM specific ATAC	HIP1R	HIP1R	nearby20kb	0.231	0.02	14610	NA	NA	NA	VPS37B	NA
rs3896871	12	123333610	G	T	1254	0.06	0.00079	0.011	6.922	CM specific ATAC	HIP1R	ABCB9	pcHiC	0.146	0.02	132586	NA	NA	NA	VPS37B	NA
rs3896871	12	123333610	G	T	1254	0.06	0.00079	0.011	6.922	CM specific ATAC	HIP1R	ARL6IP4	pcHiC	0.127	0.02	130997	NA	NA	NA	VPS37B	NA
rs3852536	12	123333824	C	T	1254	0.101	0.00079	0.018	7.071	CM specific ATAC	HIP1R	HIP1R	nearby20kb	0.231	0.034	14824	chr12:123333630-123334802	NA	NA	VPS37B	NA
rs3852536	12	123333824	C	T	1254	0.101	0.00079	0.018	7.071	CM specific ATAC	HIP1R	ABCB9	pcHiC	0.146	0.034	132372	chr12:123333630-123334802	NA	NA	VPS37B	NA
rs3852536	12	123333824	C	T	1254	0.101	0.00079	0.018	7.071	CM specific ATAC	HIP1R	ARL6IP4	pcHiC	0.127	0.034	130783	chr12:123333630-123334802	NA	NA	VPS37B	NA
rs2292135	12	123334075	G	A	1254	0.101	0.00079	0.018	7.07	CM specific ATAC	HIP1R	HIP1R	nearby20kb	0.231	0.034	15075	chr12:123333630-123334802	NA	NA	VPS37B	NA
rs2292135	12	123334075	G	A	1254	0.101	0.00079	0.018	7.07	CM specific ATAC	HIP1R	ABCB9	pcHiC	0.146	0.034	132121	chr12:123333630-123334802	NA	NA	VPS37B	NA
rs2292135	12	123334075	G	A	1254	0.101	0.00079	0.018	7.07	CM specific ATAC	HIP1R	ARL6IP4	pcHiC	0.127	0.034	130532	chr12:123333630-123334802	NA	NA	VPS37B	NA
rs2061098	12	123349410	T	C	1254	0.123	0.00079	0.023	7.169	CM specific ATAC	HIP1R	HIP1R	distance	0.231	0.037	30410	chr12:123349156-123354097	NA	NA	VPS37B	NA
rs2061098	12	123349410	T	C	1254	0.123	0.00079	0.023	7.169	CM specific ATAC	HIP1R	VPS37B	distance	0.246	0.036	31581	chr12:123349156-123354097	NA	NA	VPS37B	NA
rs12255	12	123350204	C	T	1254	0.021	0.000718	0.004	6.394	CM specific ATAC/Coding	VPS37B	VPS37B	exons	0.246	0.021	30787	chr12:123349156-123354097	chr12:123349976-123350530	NA	VPS37B	NA
rs3825143	12	123352179	C	T	1254	0.091	0.00079	0.017	7.039	CM specific ATAC	VPS37B	HIP1R	distance	0.231	0.026	33179	chr12:123349156-123354097	chr12:123352176-123352963	NA	VPS37B	NA
rs3825143	12	123352179	C	T	1254	0.091	0.00079	0.017	7.039	CM specific ATAC	VPS37B	VPS37B	distance	0.246	0.028	28812	chr12:123349156-123354097	chr12:123352176-123352963	NA	VPS37B	NA
rs3852537	12	123361501	T	C	1254	0.075	0.000329	0.033	7.421	CM shared ATAC	VPS37B	VPS37B	nearby20kb	0.246	0.075	19490	chr12:123361050-123362346	chr12:123361389-123361560	NA	VPS37B	NA
rs7980541	12	123379477	C	T	1254	0.054	0.000329	0.024	7.287	CM shared ATAC	VPS37B	VPS37B	nearby20kb	0.246	0.054	1514	chr12:123371506-123381929	chr12:123377897-123381033	NA	VPS37B	NA
rs2272368	12	124811855	G	A	1254	0.049	0.00282	0.003	6.165	CM specific ATAC/Conserved	NCOR2	NCOR2	distance	0.046	0.036	240280	chr12:124810480-124814078	NA	NA	NA	NA
rs77773608	12	133066392	A	C	1261	0.063	0.000329	0.007	5.797	CM shared ATAC	FBRSL1	FBRSL1	exons	0.504	0.063	255	chr12:133064573-133066587	chr12:133066214-133066803	NA	NA	NA
rs1882297	12	133069134	A	G	1261	0.096	0.00079	0.004	5.562	CM specific ATAC	FBRSL1	MUC8	nearby20kb	0.189	0.048	18408	chr12:133069127-133072841	NA	NA	NA	NA
rs1882297	12	133069134	A	G	1261	0.096	0.00079	0.004	5.562	CM specific ATAC	FBRSL1	FBRSL1	nearby20kb	0.504	0.048	2997	chr12:133069127-133072841	NA	NA	NA	NA
rs11614914	12	133070294	T	C	1261	0.074	0.00079	0.003	5.423	CM specific ATAC	FBRSL1	MUC8	nearby20kb	0.189	0.037	19568	chr12:133069127-133072841	NA	NA	NA	NA
rs11614914	12	133070294	T	C	1261	0.074	0.00079	0.003	5.423	CM specific ATAC	FBRSL1	FBRSL1	nearby20kb	0.504	0.037	4157	chr12:133069127-133072841	NA	NA	NA	NA
rs11610623	12	133081636	T	C	1261	0.221	0.000329	0.024	6.369	CM shared ATAC	FBRSL1	FBRSL1	nearby20kb	0.504	0.221	15499	chr12:133076851-133085382	NA	NA	NA	NA
rs4883571	12	133091614	A	G	1261	0.053	1.94e-05	0.098	6.97	Unannotated	FBRSL1	FBRSL1	distance	0.504	0.024	25477	NA	NA	NA	NA	NA
rs11146919	12	133112961	C	T	1261	0.055	1.94e-05	0.103	7.097	Unannotated	FBRSL1	FBRSL1	distance	0.504	0.02	46824	NA	NA	NA	NA	NA
rs6560886	12	133150210	T	C	1261	0.288	1.94e-05	0.536	7.827	Unannotated	P2RX2	FBRSL1	distance	0.504	0.047	84073	NA	NA	NA	NA	NA
rs6560886	12	133150210	T	C	1261	0.288	1.94e-05	0.536	7.827	Unannotated	P2RX2	P2RX2	distance	0.15	0.103	45156	NA	NA	NA	NA	NA
rs6560886	12	133150210	T	C	1261	0.288	1.94e-05	0.536	7.827	Unannotated	P2RX2	PXMP2	distance	0.038	0.026	113982	NA	NA	NA	NA	NA
rs6560886	12	133150210	T	C	1261	0.288	1.94e-05	0.536	7.827	Unannotated	P2RX2	RP13-672B3.2	distance	0.038	0.026	114425	NA	NA	NA	NA	NA
rs6560886	12	133150210	T	C	1261	0.288	1.94e-05	0.536	7.827	Unannotated	P2RX2	MUC8	distance	0.189	0.035	99484	NA	NA	NA	NA	NA
rs6560886	12	133150210	T	C	1261	0.288	1.94e-05	0.536	7.827	Unannotated	P2RX2	POLE	distance	0.038	0.026	113741	NA	NA	NA	NA	NA
rs3904323	13	23368834	C	T	1264	0.156	1.94e-05	0.347	8.542	Unannotated	SGCG	FGF9	pcHiC	0.943	0.156	1123312	NA	NA	NA	NA	NA
rs9506925	13	23368943	T	C	1264	0.76	6.95e-05	0.472	8.566	Conserved	SGCG	FGF9	pcHiC	0.943	0.76	1123421	NA	chr13:23368849-23368965	NA	NA	IRX6 - strong,MITF - strong
rs7999435	13	23374178	A	G	1264	0.021	1.94e-05	0.047	7.615	Unannotated	SGCG	SGCG	distance	0.055	0.021	380913	NA	NA	NA	NA	NA
rs1755690	13	113824266	T	C	1323	0.044	0.00079	0.004	6.756	CM specific ATAC	PROZ	PROZ	ABC	0.101	0.044	11298	chr13:113823452-113825258	chr13:113823735-113824279	NA	F10;PROZ	NA
rs3024764	13	113824314	G	A	1323	0.032	0.00079	0.003	6.684	CM specific ATAC	PROZ	PROZ	ABC	0.101	0.032	11346	chr13:113823452-113825258	NA	NA	F10;PROZ	NA
rs3794419	13	113851874	C	T	1323	0.085	0.00079	0.007	6.981	CM specific ATAC	CUL4A	PCID2	nearby20kb	0.513	0.085	11155	chr13:113850814-113852488	chr13:113851792-113851941	NA	F10;PROZ	NA
rs9549694	13	113870510	A	G	1323	0.383	0.00079	0.033	7.78	CM specific ATAC	PCID2	CUL4A	ABC	0.263	0.191	7958	chr13:113866657-113875575	chr13:113870120-113871466	NA	F10;PROZ	NA
rs9549694	13	113870510	A	G	1323	0.383	0.00079	0.033	7.78	CM specific ATAC	PCID2	PCID2	ABC,nearby20kb	0.513	0.191	7481	chr13:113866657-113875575	chr13:113870120-113871466	NA	F10;PROZ	NA
rs9549695	13	113874814	T	C	1323	0.16	0.00079	0.014	7.337	CM specific ATAC	PCID2	PCID2	nearby20kb	0.513	0.16	11785	chr13:113866657-113875575	chr13:113874402-113874860	NA	F10;PROZ	NA
rs365990	14	23861811	G	A	1326	0.095	6.31e-05	0.285	9.341	Coding/Conserved	MYH6	MYH6	exons	0.28	0.095	15675	chr14:23861225-23863339	NA	NA	NA	TCF12 - strong,TCF4 - strong
rs28631169	14	23888183	T	C	1326	0.818	0.00079	0.196	9.272	CM specific ATAC	MYH6	BCL2L2-PABPN1	distance	0.022	0.02	112139	chr14:23867416-23917224	chr14:23887976-23889060	NA	NA	NA
rs28631169	14	23888183	T	C	1326	0.818	0.00079	0.196	9.272	CM specific ATAC	MYH6	PABPN1	distance	0.03	0.027	97685	chr14:23867416-23917224	chr14:23887976-23889060	NA	NA	NA
rs28631169	14	23888183	T	C	1326	0.818	0.00079	0.196	9.272	CM specific ATAC	MYH6	IL25	distance	0.085	0.076	46165	chr14:23867416-23917224	chr14:23887976-23889060	NA	NA	NA
rs28631169	14	23888183	T	C	1326	0.818	0.00079	0.196	9.272	CM specific ATAC	MYH6	CMTM5	distance	0.095	0.083	42166	chr14:23867416-23917224	chr14:23887976-23889060	NA	NA	NA
rs28631169	14	23888183	T	C	1326	0.818	0.00079	0.196	9.272	CM specific ATAC	MYH6	NGDN	distance	0.074	0.07	50714	chr14:23867416-23917224	chr14:23887976-23889060	NA	NA	NA
rs28631169	14	23888183	T	C	1326	0.818	0.00079	0.196	9.272	CM specific ATAC	MYH6	AL049829.1	distance	0.03	0.028	96699	chr14:23867416-23917224	chr14:23887976-23889060	NA	NA	NA
rs28631169	14	23888183	T	C	1326	0.818	0.00079	0.196	9.272	CM specific ATAC	MYH6	SLC22A17	distance	0.056	0.051	66062	chr14:23867416-23917224	chr14:23887976-23889060	NA	NA	NA
rs28631169	14	23888183	T	C	1326	0.818	0.00079	0.196	9.272	CM specific ATAC	MYH6	EFS	distance	0.072	0.066	53222	chr14:23867416-23917224	chr14:23887976-23889060	NA	NA	NA
rs28631169	14	23888183	T	C	1326	0.818	0.00079	0.196	9.272	CM specific ATAC	MYH6	MYH6	distance	0.28	0.155	10697	chr14:23867416-23917224	chr14:23887976-23889060	NA	NA	NA
rs28631169	14	23888183	T	C	1326	0.818	0.00079	0.196	9.272	CM specific ATAC	MYH6	MYH7	distance	0.144	0.137	16744	chr14:23867416-23917224	chr14:23887976-23889060	NA	NA	NA
rs2145587	14	32981484	A	G	1331	0.044	1.94e-05	0.044	18.901	Unannotated	AKAP6	ARHGAP5	pcHiC	0.05	0.044	436164	chr14:32976208-32983014	NA	NA	NA	NA
rs7140396	14	32983817	A	G	1331	0.207	1.94e-05	0.207	19.616	Unannotated	AKAP6	AKAP6	distance	0.937	0.204	185338	chr14:32983082-32984697	NA	NA	NA	NA
rs11156751	14	32990437	C	T	1331	0.749	1.94e-05	0.749	20.159	Unannotated	AKAP6	AKAP6	distance	0.937	0.734	191958	NA	NA	NA	NA	NA
rs73241997	14	35173775	T	C	1332	0.546	1.94e-05	0.851	14.531	Unannotated	CFL2	SNX6	distance	0.124	0.109	74386	NA	NA	NA	NA	NA
rs73241997	14	35173775	T	C	1332	0.546	1.94e-05	0.851	14.531	Unannotated	CFL2	CFL2	distance	0.818	0.393	10254	NA	NA	NA	NA	NA
rs7143256	14	35174746	T	C	1332	0.039	1.94e-05	0.06	13.331	Unannotated	CFL2	CFL2	distance	0.818	0.028	9283	NA	NA	NA	NA	NA
rs9789	14	35181786	C	T	1332	0.349	0.00171	0.006	12.243	CM non-DA ATAC/Coding/Conserved	CFL2	CFL2	exons	0.818	0.349	2243	chr14:35176783-35185636	chr14:35181552-35182060	NA	NA	NA
rs1152591	14	64680848	A	G	1352	0.965	0.00079	0.405	30.491	CM specific ATAC	ESR2	SYNE2	pcHiC	0.25	0.241	361165	chr14:64679646-64688986	chr14:64680694-64681317	NA	SYNE2	NA
rs1152591	14	64680848	A	G	1352	0.965	0.00079	0.405	30.491	CM specific ATAC	ESR2	ESR2	pcHiC	0.25	0.241	123982	chr14:64679646-64688986	chr14:64680694-64681317	NA	SYNE2	NA
rs1152591	14	64680848	A	G	1352	0.965	0.00079	0.405	30.491	CM specific ATAC	ESR2	AKAP5	pcHiC	0.25	0.241	251369	chr14:64679646-64688986	chr14:64680694-64681317	NA	SYNE2	NA
rs1152591	14	64680848	A	G	1352	0.965	0.00079	0.405	30.491	CM specific ATAC	ESR2	PLEKHG3	pcHiC	0.25	0.241	489972	chr14:64679646-64688986	chr14:64680694-64681317	NA	SYNE2	NA
rs3814866	14	73361021	C	A	1357	0.744	0.00282	0.089	9.067	CM specific ATAC/Conserved	DPF3	DPF3	active.promoters	0.972	0.744	212	chr14:73354088-73362889	chr14:73360499-73362204	chr14:73360949-73361149	NA	NA
rs3814864	14	73361270	A	G	1357	0.176	0.00079	0.076	8.993	CM specific ATAC	DPF3	DPF3	active.promoters	0.972	0.176	461	chr14:73354088-73362889	chr14:73360499-73362204	NA	NA	NA
rs10873298	14	77426525	C	T	1359	0.528	0.00079	0.279	8.15	CM specific ATAC	IRF2BPL	C14orf166B	distance	0.106	0.057	133810	chr14:77419110-77429942	chr14:77426428-77427025	NA	NA	NA
rs10873298	14	77426525	C	T	1359	0.528	0.00079	0.279	8.15	CM specific ATAC	IRF2BPL	KIAA1737	distance	0.098	0.052	137915	chr14:77419110-77429942	chr14:77426428-77427025	NA	NA	NA
rs10873298	14	77426525	C	T	1359	0.528	0.00079	0.279	8.15	CM specific ATAC	IRF2BPL	RP11-463C8.4	distance	0.097	0.052	138129	chr14:77419110-77429942	chr14:77426428-77427025	NA	NA	NA
rs10873298	14	77426525	C	T	1359	0.528	0.00079	0.279	8.15	CM specific ATAC	IRF2BPL	TMEM63C	distance	0.068	0.036	156386	chr14:77419110-77429942	chr14:77426428-77427025	NA	NA	NA
rs10873298	14	77426525	C	T	1359	0.528	0.00079	0.279	8.15	CM specific ATAC	IRF2BPL	AC007375.1	distance	0.042	0.022	180501	chr14:77419110-77429942	chr14:77426428-77427025	NA	NA	NA
rs10873298	14	77426525	C	T	1359	0.528	0.00079	0.279	8.15	CM specific ATAC	IRF2BPL	ANGEL1	distance	0.106	0.057	133936	chr14:77419110-77429942	chr14:77426428-77427025	NA	NA	NA
rs10873298	14	77426525	C	T	1359	0.528	0.00079	0.279	8.15	CM specific ATAC	IRF2BPL	IRF2BPL	distance	0.407	0.21	68509	chr14:77419110-77429942	chr14:77426428-77427025	NA	NA	NA
rs10873298	14	77426525	C	T	1359	0.528	0.00079	0.279	8.15	CM specific ATAC	IRF2BPL	ZDHHC22	distance	0.04	0.021	182552	chr14:77419110-77429942	chr14:77426428-77427025	NA	NA	NA
rs10873299	14	77426711	A	G	1359	0.449	0.00079	0.237	8.089	CM specific ATAC	IRF2BPL	C14orf166B	distance	0.106	0.048	133996	chr14:77419110-77429942	chr14:77426428-77427025	NA	NA	NA
rs10873299	14	77426711	A	G	1359	0.449	0.00079	0.237	8.089	CM specific ATAC	IRF2BPL	KIAA1737	distance	0.098	0.045	137729	chr14:77419110-77429942	chr14:77426428-77427025	NA	NA	NA
rs10873299	14	77426711	A	G	1359	0.449	0.00079	0.237	8.089	CM specific ATAC	IRF2BPL	RP11-463C8.4	distance	0.097	0.044	137943	chr14:77419110-77429942	chr14:77426428-77427025	NA	NA	NA
rs10873299	14	77426711	A	G	1359	0.449	0.00079	0.237	8.089	CM specific ATAC	IRF2BPL	TMEM63C	distance	0.068	0.031	156200	chr14:77419110-77429942	chr14:77426428-77427025	NA	NA	NA
rs10873299	14	77426711	A	G	1359	0.449	0.00079	0.237	8.089	CM specific ATAC	IRF2BPL	ANGEL1	distance	0.106	0.048	134122	chr14:77419110-77429942	chr14:77426428-77427025	NA	NA	NA
rs10873299	14	77426711	A	G	1359	0.449	0.00079	0.237	8.089	CM specific ATAC	IRF2BPL	IRF2BPL	distance	0.407	0.179	68323	chr14:77419110-77429942	chr14:77426428-77427025	NA	NA	NA
rs147301839	15	57924714	C	A	1404	0.952	1.77e-05	0.986	9.714	Coding	POLR2M	GCOM1	exons	0.333	0.317	40608	chr15:57921599-57932487	NA	NA	NA	NA
rs147301839	15	57924714	C	A	1404	0.952	1.77e-05	0.986	9.714	Coding	POLR2M	MYZAP	exons	0.333	0.317	40575	chr15:57921599-57932487	NA	NA	NA	NA
rs147301839	15	57924714	C	A	1404	0.952	1.77e-05	0.986	9.714	Coding	POLR2M	POLR2M	exons	0.333	0.317	40483	chr15:57921599-57932487	NA	NA	NA	NA
rs7176133	15	64011104	C	T	1408	0.03	3.9e-05	0.016	6.469	Non-CM ATAC	HERC1	SNX1	pcHiC	0.113	0.03	375218	NA	NA	NA	FBXL22	NA
rs62020785	15	64076605	C	T	1408	0.03	1.94e-05	0.031	6.79	Unannotated	HERC1	SNX1	pcHiC	0.113	0.03	309717	NA	NA	NA	FBXL22	NA
rs12148666	15	64086041	A	G	1408	0.022	1.94e-05	0.023	6.669	Unannotated	HERC1	HERC1	distance	0.668	0.021	40100	NA	NA	NA	FBXL22	NA
rs17774473	15	64102711	G	T	1408	0.093	1.94e-05	0.096	7.244	Unannotated	HERC1	HERC1	distance	0.668	0.088	23430	NA	NA	NA	FBXL22	NA
rs7170477	15	64103777	A	G	1408	0.1	1.94e-05	0.104	7.303	Unannotated	HERC1	HERC1	distance	0.668	0.095	22364	NA	NA	NA	FBXL22	NA
rs7170659	15	64103905	A	G	1408	0.093	1.94e-05	0.096	7.214	Unannotated	HERC1	HERC1	distance	0.668	0.089	22236	NA	NA	NA	FBXL22	NA
rs28629845	15	64106307	C	T	1408	0.022	1.94e-05	0.023	6.64	Unannotated	HERC1	DAPK2	pcHiC	0.071	0.022	257925	NA	NA	NA	FBXL22	NA
rs62020836	15	64120967	G	A	1408	0.024	1.94e-05	0.025	6.584	Unannotated	HERC1	HERC1	distance	0.668	0.023	5174	NA	NA	NA	FBXL22	NA
rs62023076	15	64129839	A	G	1408	0.024	1.94e-05	0.025	6.573	Unannotated	HERC1	HERC1	distance	0.668	0.023	3698	NA	NA	NA	FBXL22	NA
rs62023077	15	64130119	C	T	1408	0.022	1.94e-05	0.023	6.571	Unannotated	HERC1	HERC1	distance	0.668	0.022	3978	NA	NA	NA	FBXL22	NA
rs1979409	15	73465477	A	G	1413	0.218	1.94e-05	0.219	9.052	Unannotated	NEO1	NEO1	distance	0.192	0.17	121426	NA	NA	NA	NA	NA
rs1979409	15	73465477	A	G	1413	0.218	1.94e-05	0.219	9.052	Unannotated	NEO1	HCN4	distance	1.095	0.038	196128	NA	NA	NA	NA	NA
rs570001	15	73608221	G	A	1413	0.032	1.94e-05	0.032	8.073	Unannotated	HCN4	HCN4	pcHiC	1.095	0.032	53384	NA	NA	NA	NA	NA
rs498005	15	73620310	C	T	1413	0.045	1.94e-05	0.046	8.265	Unannotated	HCN4	HCN4	distance	1.095	0.037	41295	NA	NA	NA	NA	NA
rs519946	15	73620449	C	T	1413	0.083	1.94e-05	0.083	8.517	Unannotated	HCN4	HCN4	distance	1.095	0.067	41156	NA	NA	NA	NA	NA
rs519970	15	73620460	C	T	1413	0.05	1.94e-05	0.05	8.294	Unannotated	HCN4	HCN4	distance	1.095	0.04	41145	NA	NA	NA	NA	NA
rs476846	15	73620525	C	T	1413	0.091	1.94e-05	0.091	8.561	Unannotated	HCN4	HCN4	distance	1.095	0.073	41080	NA	NA	NA	NA	NA
rs569532	15	73623937	G	A	1413	0.076	1.94e-05	0.077	8.477	Unannotated	HCN4	HCN4	distance	1.095	0.061	37668	NA	NA	NA	NA	NA
rs498868	15	73625519	C	T	1413	0.045	1.94e-05	0.046	8.283	Unannotated	HCN4	HCN4	pcHiC	1.095	0.045	36086	NA	NA	NA	NA	NA
rs488156	15	73625895	G	A	1413	0.076	1.94e-05	0.077	8.466	Unannotated	HCN4	HCN4	pcHiC	1.095	0.076	35710	NA	NA	NA	NA	NA
rs492362	15	73626223	G	A	1413	0.05	1.94e-05	0.05	8.301	Unannotated	HCN4	HCN4	pcHiC	1.095	0.05	35382	NA	NA	NA	NA	NA
rs573397	15	73627122	C	A	1413	0.118	1.94e-05	0.118	8.617	Unannotated	HCN4	NPTN	pcHiC	0.619	0.118	299353	NA	NA	NA	NA	NA
rs7172038	15	73667255	G	T	1414	0.989	0.00282	0.396	35.32	CM specific ATAC/Conserved	HCN4	HCN4	ABC	1.095	0.494	5650	chr15:73666174-73669240	chr15:73666633-73668004	chr15:73667064-73667264	NA	NA
rs7172038	15	73667255	G	T	1414	0.989	0.00282	0.396	35.32	CM specific ATAC/Conserved	HCN4	NPTN	pcHiC	0.619	0.494	259220	chr15:73666174-73669240	chr15:73666633-73668004	chr15:73667064-73667264	NA	NA
rs12908004	15	80676925	G	A	1416	1	0.000529	0.999	15.386	CM non-DA ATAC	RP11-210M15.2	ARNT2	nearby20kb	0.502	0.5	19767	NA	NA	NA	RP11-210M15.2;ARNT2	NA
rs12908004	15	80676925	G	A	1416	1	0.000529	0.999	15.386	CM non-DA ATAC	RP11-210M15.2	RP11-210M15.2	nearby20kb	0.502	0.5	18992	NA	NA	NA	RP11-210M15.2;ARNT2	NA
rs11632439	15	80987012	G	A	1417	0.036	0.00079	0.001	5.993	CM specific ATAC	ABHD17C	ABHD17C	distance	0.57	0.028	14987	chr15:80986342-80989122	chr15:80986361-80988621	NA	ABHD17C	NA
rs2759301	15	80994288	A	G	1417	0.109	1.94e-05	0.113	8.298	Unannotated	ABHD17C	ABHD17C	distance	0.57	0.079	22263	chr15:80993375-80997547	NA	NA	ABHD17C	NA
rs2759301	15	80994288	A	G	1417	0.109	1.94e-05	0.113	8.298	Unannotated	ABHD17C	KIAA1199	distance	0.382	0.026	77396	chr15:80993375-80997547	NA	NA	ABHD17C	NA
rs8031196	15	80994931	T	C	1417	0.078	1.94e-05	0.081	8.143	Unannotated	ABHD17C	ABHD17C	distance	0.57	0.056	22906	chr15:80993375-80997547	NA	NA	ABHD17C	NA
rs7173751	15	80998903	A	G	1417	0.056	1.94e-05	0.058	7.987	Unannotated	ABHD17C	ABHD17C	distance	0.57	0.038	26878	NA	NA	NA	ABHD17C	NA
rs923000	15	81000001	C	A	1417	0.056	1.94e-05	0.058	8.008	Unannotated	ABHD17C	ABHD17C	distance	0.57	0.038	27976	NA	NA	NA	ABHD17C	NA
rs2627313	15	81006712	T	C	1417	0.092	1.94e-05	0.095	8.169	Unannotated	ABHD17C	ABHD17C	distance	0.57	0.057	34687	NA	NA	NA	ABHD17C	NA
rs2627313	15	81006712	T	C	1417	0.092	1.94e-05	0.095	8.169	Unannotated	ABHD17C	KIAA1199	distance	0.382	0.031	64972	NA	NA	NA	ABHD17C	NA
rs2759315	15	81009646	A	C	1417	0.071	1.94e-05	0.074	7.997	Unannotated	ABHD17C	ABHD17C	distance	0.57	0.042	37621	NA	NA	NA	NA	NA
rs2759315	15	81009646	A	C	1417	0.071	1.94e-05	0.074	7.997	Unannotated	ABHD17C	KIAA1199	distance	0.382	0.026	62038	NA	NA	NA	NA	NA
rs2062316	15	81010249	G	A	1417	0.071	1.94e-05	0.074	7.983	Unannotated	ABHD17C	ABHD17C	distance	0.57	0.042	38224	NA	NA	NA	ABHD17C	NA
rs2062316	15	81010249	G	A	1417	0.071	1.94e-05	0.074	7.983	Unannotated	ABHD17C	KIAA1199	distance	0.382	0.026	61435	NA	NA	NA	ABHD17C	NA
rs2627323	15	81021383	T	C	1417	0.037	1.94e-05	0.038	7.74	Unannotated	ABHD17C	ABHD17C	pcHiC	0.57	0.037	49358	NA	NA	chr15:81021215-81021415	ABHD17C	NA
rs1407588	15	81052947	A	G	1417	0.084	1.94e-05	0.088	8.07	Unannotated	KIAA1199	KIAA1199	distance	0.382	0.06	18737	NA	NA	NA	ABHD17C	NA
rs11857366	15	99263801	A	G	1427	0.027	0.00079	0.009	7.998	CM specific ATAC	IGF1R	IGF1R	distance	0.917	0.025	71601	chr15:99260970-99264401	chr15:99263615-99263920	NA	IGF1R	NA
rs6598541	15	99271135	A	G	1427	0.045	3.9e-05	0.32	9.653	Non-CM ATAC	IGF1R	IGF1R	distance	0.917	0.042	78935	chr15:99266800-99276472	chr15:99270656-99272493	NA	IGF1R	NA
rs7166287	15	99273075	C	T	1427	0.644	0.00079	0.224	9.553	CM specific ATAC	IGF1R	IGF1R	distance	0.917	0.591	80875	chr15:99266800-99276472	chr15:99272736-99273501	NA	IGF1R	MEIS1 - strong
rs7166287	15	99273075	C	T	1427	0.644	0.00079	0.224	9.553	CM specific ATAC	IGF1R	FAM169B	distance	0.062	0.04	215464	chr15:99266800-99276472	chr15:99272736-99273501	NA	IGF1R	MEIS1 - strong
rs4966019	15	99274326	C	T	1427	0.225	0.00079	0.078	9.073	CM specific ATAC	IGF1R	IGF1R	distance	0.917	0.206	82126	chr15:99266800-99276472	chr15:99274176-99274655	NA	IGF1R	NA
rs140185678	16	2003016	A	G	1431	1	0.00256	1	13.614	CM specific ATAC/Coding/Conserved	RPL3L	RPL3L	exons	1	1	4591	chr16:1999522-2005509	NA	NA	NA	NA
rs2106261	16	73051620	T	C	1468	1	1.94e-05	1	90.304	Unannotated	ZFHX3	ZFHX3	distance	0.845	0.845	41977	NA	NA	NA	NA	NA
rs2106261	16	73051620	T	C	1468	1	1.94e-05	1	90.304	Unannotated	ZFHX3	C16orf47	distance	0.155	0.155	126726	NA	NA	NA	NA	NA
rs9393	17	1248392	G	A	1485	0.037	6.31e-05	0.014	6.69	Coding/Conserved	YWHAE	YWHAE	exons	0.555	0.037	55280	NA	NA	NA	NA	NA
rs12452627	17	1302472	A	G	1485	0.155	0.000329	0.011	6.588	CM shared ATAC	YWHAE	YWHAE	nearby20kb	0.555	0.155	1200	chr17:1299060-1304328	chr17:1302187-1304034	NA	NA	NA
rs7225165	17	1309850	A	G	1485	0.468	1.94e-05	0.584	8.494	Unannotated	YWHAE	TUSC5	distance	0.055	0.021	126893	NA	NA	NA	NA	NA
rs7225165	17	1309850	A	G	1485	0.468	1.94e-05	0.584	8.494	Unannotated	YWHAE	YWHAE	distance	0.555	0.236	6178	NA	NA	NA	NA	NA
rs7225165	17	1309850	A	G	1485	0.468	1.94e-05	0.584	8.494	Unannotated	YWHAE	CRK	distance	0.146	0.086	56606	NA	NA	NA	NA	NA
rs7225165	17	1309850	A	G	1485	0.468	1.94e-05	0.584	8.494	Unannotated	YWHAE	MYO1C	distance	0.086	0.048	86256	NA	NA	NA	NA	NA
rs7225165	17	1309850	A	G	1485	0.468	1.94e-05	0.584	8.494	Unannotated	YWHAE	INPP5K	distance	0.044	0.029	110332	NA	NA	NA	NA	NA
rs61248729	17	1312046	T	G	1485	0.047	1.94e-05	0.058	7.421	Unannotated	YWHAE	YWHAE	distance	0.555	0.023	8374	NA	NA	NA	NA	NA
rs35049113	17	7439726	C	T	1490	0.04	1.94e-05	0.069	8.433	Unannotated	TNFSF12	SPEM1	pcHiC	0.073	0.04	116047	NA	NA	NA	SAT2	NA
rs4968222	17	7445047	A	G	1490	0.054	1.94e-05	0.092	8.547	Unannotated	TNFSF12	YBX2	pcHiC	0.079	0.027	247113	NA	NA	NA	SAT2	NA
rs4968222	17	7445047	A	G	1490	0.054	1.94e-05	0.092	8.547	Unannotated	TNFSF12	PLSCR3	pcHiC	0.05	0.027	NA	NA	NA	NA	SAT2	NA
rs12948869	17	7449048	A	G	1490	0.022	1.94e-05	0.038	8.059	Unannotated	TNFSF12	SPEM1	pcHiC	0.073	0.022	125369	NA	NA	NA	SAT2	NA
rs62059804	17	7453505	A	C	1490	0.28	0.000127	0.073	8.492	Coding/Conserved/Non-CM ATAC	TNFSF12-TNFSF13	TNFSF12	exons	0.172	0.14	1297	chr17:7451536-7454223	NA	NA	NA	NA
rs62059804	17	7453505	A	C	1490	0.28	0.000127	0.073	8.492	Coding/Conserved/Non-CM ATAC	TNFSF12-TNFSF13	TNFSF12-TNFSF13	exons	0.173	0.14	1089	chr17:7451536-7454223	NA	NA	NA	NA
rs116600817	17	7458795	G	A	1490	0.085	1.94e-05	0.145	8.611	Unannotated	TNFSF13	YBX2	pcHiC	0.079	0.028	260861	NA	NA	NA	NA	NA
rs116600817	17	7458795	G	A	1490	0.085	1.94e-05	0.145	8.611	Unannotated	TNFSF13	KCTD11	pcHiC	0.039	0.028	203587	NA	NA	NA	NA	NA
rs116600817	17	7458795	G	A	1490	0.085	1.94e-05	0.145	8.611	Unannotated	TNFSF13	TMEM256	pcHiC	0.038	0.028	151339	NA	NA	NA	NA	NA
rs78744936	17	7461343	A	G	1490	0.087	3.9e-05	0.074	8.449	Non-CM ATAC	TNFSF13	TNFSF13	active.promoters	0.103	0.087	266	chr17:7460091-7466248	chr17:7461312-7461860	NA	SAT2	ZNF423 - strong
rs72811284	17	12604046	T	C	1494	0.041	1.94e-05	0.041	9.586	Unannotated	AC005358.1	AC005358.1	distance	0.542	0.02	22153	NA	NA	NA	NA	NA
rs8073609	17	12608271	C	T	1494	0.173	1.94e-05	0.173	10.232	Unannotated	AC005358.1	MYOCD	distance	0.313	0.059	39064	NA	NA	NA	NA	NA
rs8073609	17	12608271	C	T	1494	0.173	1.94e-05	0.173	10.232	Unannotated	AC005358.1	AC005358.1	distance	0.542	0.09	17928	NA	NA	NA	NA	NA
rs8073609	17	12608271	C	T	1494	0.173	1.94e-05	0.173	10.232	Unannotated	AC005358.1	ARHGAP44	distance	0.143	0.024	84585	NA	NA	NA	NA	NA
rs55986665	17	12612632	T	C	1494	0.183	1.94e-05	0.184	10.242	Unannotated	AC005358.1	MYOCD	distance	0.313	0.056	43425	NA	NA	NA	NA	NA
rs55986665	17	12612632	T	C	1494	0.183	1.94e-05	0.184	10.242	Unannotated	AC005358.1	AC005358.1	distance	0.542	0.101	13567	NA	NA	NA	NA	NA
rs55986665	17	12612632	T	C	1494	0.183	1.94e-05	0.184	10.242	Unannotated	AC005358.1	ARHGAP44	distance	0.143	0.027	80224	NA	NA	NA	NA	NA
rs55941572	17	12612931	C	T	1494	0.233	1.94e-05	0.234	10.352	Unannotated	AC005358.1	MYOCD	distance	0.313	0.07	43724	NA	NA	NA	NA	NA
rs55941572	17	12612931	C	T	1494	0.233	1.94e-05	0.234	10.352	Unannotated	AC005358.1	AC005358.1	distance	0.542	0.129	13268	NA	NA	NA	NA	NA
rs55941572	17	12612931	C	T	1494	0.233	1.94e-05	0.234	10.352	Unannotated	AC005358.1	ARHGAP44	distance	0.143	0.034	79925	NA	NA	NA	NA	NA
rs72811289	17	12614947	C	T	1494	0.038	1.94e-05	0.038	9.587	Unannotated	AC005358.1	AC005358.1	distance	0.542	0.022	11252	NA	NA	NA	NA	NA
rs72811292	17	12615033	G	A	1494	0.144	1.94e-05	0.145	10.243	Unannotated	AC005358.1	MYOCD	distance	0.313	0.041	45826	NA	NA	NA	NA	NA
rs72811292	17	12615033	G	A	1494	0.144	1.94e-05	0.145	10.243	Unannotated	AC005358.1	AC005358.1	distance	0.542	0.082	11166	NA	NA	NA	NA	NA
rs72811292	17	12615033	G	A	1494	0.144	1.94e-05	0.145	10.243	Unannotated	AC005358.1	ARHGAP44	distance	0.143	0.022	77823	NA	NA	NA	NA	NA
rs55831402	17	12617282	G	A	1494	0.128	1.94e-05	0.129	10.143	Unannotated	AC005358.1	MYOCD	distance	0.313	0.034	48075	NA	chr17:12617014-12617289	NA	NA	NA
rs55831402	17	12617282	G	A	1494	0.128	1.94e-05	0.129	10.143	Unannotated	AC005358.1	AC005358.1	distance	0.542	0.074	8917	NA	chr17:12617014-12617289	NA	NA	NA
rs2313430	17	37929816	C	T	1506	0.097	0.000139	0.02	9.635	Conserved/Non-CM ATAC	GRB7	ZPBP2	pcHiC	0.28	0.097	94601	NA	NA	NA	PNMT;PGAP3;GSDMA	NA
rs1453559	17	38020419	T	C	1506	0.08	0.000127	0.018	9.626	Coding/Conserved/Non-CM ATAC	IKZF3	IKZF3	exons	0.182	0.08	22	NA	chr17:38020251-38020689	NA	PNMT;PGAP3;GSDMA	NA
rs11557467	17	38028634	G	T	1506	0.071	6.31e-05	0.032	9.908	Coding/Conserved	ZPBP2	ZPBP2	exons	0.28	0.071	4217	NA	NA	NA	PGAP3;GSDMA	NA
rs12103884	17	38045725	C	T	1506	0.024	1.94e-05	0.035	9.951	Unannotated	ZPBP2	GRB7	pcHiC	0.07	0.024	151545	NA	NA	NA	PGAP3;GSDMA	NA
rs12950209	17	38049102	T	C	1506	0.039	1.94e-05	0.057	10.108	Unannotated	ZPBP2	TCAP	pcHiC	0.069	0.039	228662	NA	NA	NA	PGAP3;GSDMA	NA
rs12950743	17	38049233	T	C	1506	0.024	1.94e-05	0.035	9.938	Unannotated	ZPBP2	TCAP	pcHiC	0.069	0.024	228793	NA	NA	NA	PGAP3;GSDMA	NA
rs8067378	17	38051348	A	G	1506	0.022	1.94e-05	0.032	9.845	Unannotated	GSDMB	PNMT	pcHiC	0.039	0.022	227114	NA	NA	NA	PGAP3;GSDMA	NA
rs35643216	17	44248837	C	T	1510	0.06	0.00256	0.001	8.314	CM specific ATAC/Coding/Conserved	KANSL1	KANSL1	exons	0.155	0.06	53896	NA	NA	NA	NA	NA
rs1563304	17	44874453	T	C	1510	0.524	1.94e-05	0.768	11.592	Unannotated	WNT3	WNT9B	distance	0.214	0.213	36114	NA	NA	NA	LRRC37A2	ESR2 - strong
rs1563304	17	44874453	T	C	1510	0.524	1.94e-05	0.768	11.592	Unannotated	WNT3	GOSR2	distance	0.068	0.035	126030	NA	NA	NA	LRRC37A2	ESR2 - strong
rs1563304	17	44874453	T	C	1510	0.524	1.94e-05	0.768	11.592	Unannotated	WNT3	RP11-156P1.2	distance	0.044	0.035	126046	NA	NA	NA	LRRC37A2	ESR2 - strong
rs1563304	17	44874453	T	C	1510	0.524	1.94e-05	0.768	11.592	Unannotated	WNT3	WNT3	distance	0.227	0.214	36067	NA	NA	NA	LRRC37A2	ESR2 - strong
rs9903063	17	76720713	T	C	1527	0.089	0.00079	0.01	6.76	CM specific ATAC	CYTH1	TMC6	pcHiC	0.089	0.089	592225	chr17:76717553-76721441	chr17:76720690-76720952	NA	CYTH1;USP36	NA
rs1384367	17	76729757	C	A	1527	0.151	0.00079	0.017	7.008	CM specific ATAC	CYTH1	CYTH1	distance	0.693	0.092	48622	chr17:76729093-76733786	chr17:76729573-76729905	NA	CYTH1;USP36	NA
rs1384367	17	76729757	C	A	1527	0.151	0.00079	0.017	7.008	CM specific ATAC	CYTH1	USP36	distance	0.104	0.028	107766	chr17:76729093-76733786	chr17:76729573-76729905	NA	CYTH1;USP36	NA
rs1384366	17	76729784	A	G	1527	0.12	0.00079	0.014	6.898	CM specific ATAC	CYTH1	CYTH1	distance	0.693	0.073	48595	chr17:76729093-76733786	chr17:76729573-76729905	NA	CYTH1;USP36	NA
rs1384366	17	76729784	A	G	1527	0.12	0.00079	0.014	6.898	CM specific ATAC	CYTH1	USP36	distance	0.104	0.022	107739	chr17:76729093-76733786	chr17:76729573-76729905	NA	CYTH1;USP36	NA
rs3936523	17	76731319	C	T	1527	0.04	0.000329	0.011	6.818	CM shared ATAC	CYTH1	CYTH1	distance	0.693	0.024	47060	chr17:76729093-76733786	NA	NA	CYTH1;USP36	NA
rs7224711	17	76772288	C	T	1527	0.025	3.9e-05	0.059	7.429	Non-CM ATAC	CYTH1	CYTH1	nearby20kb	0.693	0.025	6091	chr17:76770270-76772608	NA	NA	CYTH1;USP36	NA
rs11650046	17	76777694	C	A	1527	0.037	0.000329	0.01	6.774	CM shared ATAC	CYTH1	CYTH1	nearby20kb	0.693	0.037	685	chr17:76775630-76780371	chr17:76777689-76777899	chr17:76777678-76777878	CYTH1;USP36	NA
rs62075587	17	76789886	C	T	1527	0.037	0.000329	0.01	6.764	CM shared ATAC	CYTH1	CYTH1	nearby20kb	0.693	0.037	11507	NA	NA	NA	CYTH1;USP36	NA
rs8073626	17	76790279	C	T	1527	0.268	0.00079	0.031	7.137	CM specific ATAC	CYTH1	CYTH1	nearby20kb	0.693	0.268	11900	NA	chr17:76790091-76790604	NA	CYTH1;USP36	NA
rs9953366	18	46474192	T	C	1557	0.921	0.000329	0.839	10.739	CM shared ATAC	SMAD7	SMAD7	nearby20kb	0.31	0.23	2889	chr18:46452371-46480247	chr18:46473493-46474414	chr18:46474091-46474291	NA	SIX2 - strong
rs9953366	18	46474192	T	C	1557	0.921	0.000329	0.839	10.739	CM shared ATAC	SMAD7	C18orf32	pcHiC	0.23	0.23	539430	chr18:46452371-46480247	chr18:46473493-46474414	chr18:46474091-46474291	NA	SIX2 - strong
rs9953366	18	46474192	T	C	1557	0.921	0.000329	0.839	10.739	CM shared ATAC	SMAD7	RPL17-C18orf32	pcHiC	0.23	0.23	543764	chr18:46452371-46480247	chr18:46473493-46474414	chr18:46474091-46474291	NA	SIX2 - strong
rs9953366	18	46474192	T	C	1557	0.921	0.000329	0.839	10.739	CM shared ATAC	SMAD7	RPL17	pcHiC	0.23	0.23	544714	chr18:46452371-46480247	chr18:46473493-46474414	chr18:46474091-46474291	NA	SIX2 - strong
rs1530330	18	46523482	G	T	1557	0.067	0.00282	0.007	8.498	CM specific ATAC/Conserved	SMAD7	SMAD7	distance	0.31	0.067	46401	chr18:46522945-46525541	chr18:46523435-46523563	chr18:46523399-46523876	NA	NA
rs8088085	18	48708548	C	A	1558	0.024	1.94e-05	0.038	7.319	Unannotated	MEX3C	MEX3C	distance	0.91	0.022	36126	NA	NA	NA	MEX3C	NA
rs1893379	18	48718536	A	G	1558	0.035	3.9e-05	0.028	7.176	Non-CM ATAC	MEX3C	MEX3C	distance	0.91	0.033	26138	chr18:48717592-48718641	NA	NA	MEX3C	NA
rs11877810	18	48720526	C	T	1558	0.035	3.9e-05	0.028	7.204	Non-CM ATAC	MEX3C	MEX3C	distance	0.91	0.033	24148	chr18:48719487-48725307	chr18:48720244-48720529	NA	MEX3C	NA
rs62092913	18	48722080	G	A	1558	0.294	0.000329	0.028	7.199	CM shared ATAC	MEX3C	MEX3C	distance	0.91	0.279	22594	chr18:48719487-48725307	chr18:48721613-48723442	chr18:48721933-48722133	MEX3C	NA
rs112088230	18	48725041	G	A	1558	0.029	3.9e-05	0.023	7.026	Non-CM ATAC	MEX3C	MEX3C	distance	0.91	0.028	19633	chr18:48719487-48725307	NA	NA	NA	NA
rs59236902	18	48738298	A	C	1558	0.029	3.9e-05	0.023	7.01	Non-CM ATAC	MEX3C	MEX3C	distance	0.91	0.028	6376	NA	NA	NA	NA	NA
rs2834618	21	36119111	G	T	1670	1	1.94e-05	1	16.467	Unannotated	CLIC6	CLIC6	distance	0.715	0.715	77423	NA	chr21:36119005-36119153	NA	NA	NA
rs2834618	21	36119111	G	T	1670	1	1.94e-05	1	16.467	Unannotated	CLIC6	KCNE1	distance	0.031	0.031	234538	NA	chr21:36119005-36119153	NA	NA	NA
rs2834618	21	36119111	G	T	1670	1	1.94e-05	1	16.467	Unannotated	CLIC6	RCAN1	distance	0.242	0.242	131670	NA	chr21:36119005-36119153	NA	NA	NA
rs361834	22	18597404	A	G	1682	0.114	0.00282	0.035	10.276	CM specific ATAC/Conserved	TUBA8	TUBA8	nearby20kb	1	0.114	4307	chr22:18592552-18604472	chr22:18596875-18597571	NA	NA	NA
rs464901	22	18597502	C	T	1682	0.886	0.00079	0.963	11.815	CM specific ATAC	TUBA8	TUBA8	nearby20kb	1	0.886	4405	chr22:18592552-18604472	chr22:18596875-18597571	NA	NA	NA
rs133885	22	26159289	A	G	1686	0.185	6.31e-05	0.204	8.654	Coding/Conserved	MYO18B	MYO18B	exons	0.974	0.185	21178	chr22:26148392-26159757	NA	NA	NA	NA
rs133902	22	26164079	T	C	1686	0.685	6.95e-05	0.685	9.039	Conserved	MYO18B	MYO18B	distance	0.974	0.665	25968	NA	NA	NA	NA	NA
rs9613026	22	26245038	A	G	1686	0.039	0.00079	0.003	6.809	CM specific ATAC	MYO18B	MYO18B	distance	0.974	0.037	106927	chr22:26244665-26245190	NA	NA	NA	NA
rs9613027	22	26245283	G	A	1686	0.062	0.00079	0.005	6.82	CM specific ATAC	MYO18B	MYO18B	distance	0.974	0.059	107172	NA	chr22:26245200-26245303	NA	NA	NA

## Sheet: Supplementary Data 4
Supplementary Data 4. Comparing high PIP variants with variants with allele-specific activitiy from van Ouwerkerk et al. 2020
* p-value (allele-specific) were from the allele-specific STARR-seq result (Z-test) in van Ouwerkerk et al. 2020 Supplementary Table IV.
Locus	Sentinel SNP from van Ouwerkerk et al. 2020	SNPs with PIP > 0.5	PIP	CS	Function	p-value (allele-specific)	allele-specific activity (in 24 AS SNPs)	SNPs with allele-specific activitiy (rsID:PIP)	Category
1	rs11264280	rs11264280	0.999998	1	PC-HiC to KCNN3			rs76749863:0,rs74541936:0,rs1218584:NA,rs1061122:0,rs34292822:NA,rs12754189:0,rs36088503:0,rs10908445:0	Disagree
2	rs608930	rs577676	0.884934	1	eQTL of PRRX1			rs680084:0.03	Disagree
3	rs6790396	rs6801957	0.881662	1	CM-specific OCR, eQTL of SCN10A	0.414		rs6599220:0,rs7430477:0	Disagree
4	rs2129977	rs1906615	0.79618	1	Unannotated			rs9790621:0,rs76809100:NA	Disagree
5	rs34750263								Low power
6	rs13191450							rs34379825:0	Low power
7	rs11773845	rs3807989	0.949911	1	CM-specific OCR	0	Y	rs12668473:0,rs3807989:0.95,rs7811851:NA,rs7795510:0	Agree
8	rs4385527	rs10821415	0.965457	1	CM-specific OCR	0.029	Y	rs4744421:0,rs10821415:0.97	Agree
9	rs11598047	rs11598047	0.701886	1	Unannotated			rs2902635:0	Disagree
10	rs2738413	rs1152591	0.965108	1	CM-specific OCR, PC-HiC to SYNE2, AKAP5				Unkown
11	rs74022964	rs7172038	0.988932	1	CM-specific OCR, ABC to HCN4	0.505		rs6495063:0,rs6495062:0	Disagree
12	rs2359171	rs2106261	0.999752	1	Unannotated			rs9940321:0	Disagree

## Sheet: Supplementary Data 5
Supplementary Data 5. Sum of PIPs for SNPs assigned to functional categories, including OCRs in different cell types, as well as in exons, UTRs and introns.
"Sum.PIP": sum of fine-mapping PIPs (under an informative prior using OCRs) for SNPs in each category. Values greater than 0.001 are highlighted in red.
"N.SNPs": number of SNPs included in "Sum.PIP" results.
		Cardiomyocyte OCRs		Endothelial OCRs		Fibroblast OCRs		Lymphoid OCRs		Myeloid OCRs		Pericyte OCRs		Shared OCRs (2-3 cell types)		Shared OCRs (4+ cell types)		Exons		UTR		Intron
Locus	Location	Sum.PIPs	N.SNPs	Sum.PIPs	N.SNPs	Sum.PIPs	N.SNPs	Sum.PIPs	N.SNPs	Sum.PIPs	N.SNPs	Sum.PIPs	N.SNPs	Sum.PIPs	N.SNPs	Sum.PIPs	N.SNPs	Sum.PIPs	N.SNPs	Sum.PIPs	N.SNPs	Sum.PIPs	N.SNPs
7	chr1:9365199-10806984	0.74	7	0	0	0	0	0	0	0	0	0	0	0	0	0	0	0.03	1	0	0	0.01	1
15	chr1:21736588-23086883	0.05	5	0	2	0.01	6	0	0	0	0	0	0	0	1	0.01	4	0	0	0	0	0	1
25	chr1:40200567-41975327	0	10	0	0	0	0	0	0	0	1	0	0	0	4	0	5	0	0	0	4	0	20
31	chr1:48978188-49894177	0	2	0	0	0	0	0	0	0	0	0	0	0	0	0	0	0	0	0	0	0	1
32	chr1:49894177-51713726	0.68	1	0	0	0	0	0	0	0	0	0	0	0	0	0	1	0	0	0	1	0.08	13
33	chr1:51713726-54226262	0.29	2	0	0	0	0	0	0	0	0	0	0	0	1	0	1	0	0	0.02	1	0.13	57
69	chr1:111741737-113273306	0.02	3	0	0	0	0	0	0	0	0	0	0	0	0	0	0	0	0	0	0	0	0
72	chr1:115880593-118839067	0.98	25	0	0	0	0	0	0	0	0	0	0	0	0	0	0	0	0	0	0	0	1
74	chr1:144977494-148361253	0.27	4	0	0	0	0	0	0	0	0	0	0	0.07	2	0	0	0	0	0	0	0	0
77	chr1:153180829-154770403	0	0	0	0	1	3	0	0	0	0	0	0	0	0	0	0	0	0	0	0	0	0
78	chr1:154770403-156336133	0	0	0	0	0	0	0	0	0	0	0	0	0	0	0	0	0	0	0	0	0	0
85	chr1:169086324-170557776	0	0	0	0	0	0	0	0	0	0	0	0	0	0	0	0	0	0	0	0	0	0
86	chr1:170557776-173097907	0	0	0	0	0	1	0	0	0	0	0	0	0.02	3	0	0	0	0	0	0	0	0
104	chr1:201589975-203334734	0.75	1	0	0	0	0	0	0	0	0	0	0	0	0	0	0	0	0	0	0	0.12	5
106	chr1:204681068-206073265	0	2	0	0	0	0	0	0	0	0	0	0	0	0	0.73	4	0	0	0.13	4	0.08	6
148	chr2:24686918-26894985	0.98	2	0	0	0	0	0	0	0	0	0	0	0	0	0	0	0	0	0	1	0	0
173	chr2:60292000-62429044	0.19	4	0	2	0	0	0	0	0.01	2	0	0	0.13	3	0.01	6	0.02	2	0	2	0.35	142
175	chr2:64625913-65933444	0	0	0	1	0	0	0	0	0	1	0	0	0	0	0	0	0	0	0	0	0	1
179	chr2:69139564-70755198	0	0	0	0	0	1	0	0	0	2	0	3	0	0	0.07	2	0	1	0.37	3	0.38	37
187	chr2:85140680-88038507	0	3	0	0	0	0	0	0	0	0	0	0	0	0	0.42	2	0	2	0	0	0	12
207	chr2:127373764-128034347	0	0	0	0	0	0	0	0	0	1	0.15	1	0	0	0	0	0	0	0	0	0	0
219	chr2:144519484-146445570	0.9	4	0	0	0.02	2	0	0	0	0	0	0	0	0	0	0	0	1	0	0	0	0
238	chr2:173138905-175588929	0	0	0	0	0	0	0	0	0	0	0	0	0	1	0	0	0	0	0	0	0	0
241	chr2:178553183-181312739	0	0	0	0	0	0	0	0	0	0	0	0	0.03	2	0	0	0.84	10	0	2	0.05	5
251	chr2:199311125-201576284	0.13	3	0	0	0	0	0	0	0	0	0	0	0	0	0.03	4	0	0	0	0	0	0
258	chr2:212379518-214014282	0	7	0	0	0	0	0	0	0	0	0	0	0	0	0	0	0	0	0	0	0	0
286	chr3:11019665-13070799	0.4	1	0	0	0	0	0	0	0	0	0	0	0	0	0	0	0	0	0	0	0	0
295	chr3:23804865-25461558	0.18	7	0	0	0	0	0	0	0	1	0	0	0	0	0	0	0	0	0	0	0	0
304	chr3:36486842-38356116	0.85	5	0	0	0	0	0	0	0	0	0	0	0	0	0	0	0.14	1	0	0	0	2
305	chr3:38356116-40221298	0.88	1	0	0	0	0	0	0	0	0	0	0	0	0	0	0	0.09	1	0	0	0.01	7
322	chr3:66270447-68286914	0.24	6	0	0	0	2	0	3	0	0	0	1	0	1	0	0	0.12	2	0	0	0.37	10
324	chr3:69276762-70449028	0	3	0	0	0.19	6	0	0	0	2	0	0	0.32	11	0	0	0	0	0	0	0	1
336	chr3:88298373-94255316	0	0	0	0	0	2	0	0	0	0	0	0	0	0	0	0	0.34	2	0.04	5	0.22	18
346	chr3:110513770-112815699	0.39	3	0	1	0	0	0	0	0	0	0	0	0	1	0.05	3	0	1	0	1	0	3
361	chr3:135456906-137371083	0.02	12	0	0	0	1	0	0	0	0	0	0	0	0	0.03	1	0	0	0.07	2	0.28	35
387	chr3:178107165-179374586	0	0	0	0	0	0	0	0	0.02	1	0	0	0	0	0.02	2	0	0	0.14	7	0.06	21
397	chr3:194786674-195971408	0.99	6	0	0	0	0	0	0	0	0	0	0	0	0	0	1	0	0	0	1	0	0
453	chr4:80990297-82125315	0	0	0	0	0	0	0	0	0	0	0	0	0	0	0	0	0	0	0	0	0	1
467	chr4:103221356-105305294	0.06	5	0	0	0	0	0	0	0.01	5	0	0	0.08	5	0.12	7	0	0	0.12	9	0.16	101
470	chr4:108815348-111256567	0	9	0	1	0	0	0	0	0	0	0	0	0	0	0	0	0	1	0	1	0	7
471	chr4:111256567-113870102	0	0	0	0	0	0	0	0	0	0	0	0	0	0	0	0	0	0	0	0	0	0
472	chr4:113870102-115666246	0.82	3	0	0	0	0	0	0	0	0	0	0	0.05	1	0	0	0	0	0	0	0	1
495	chr4:148521873-150683580	0.83	7	0	0	0	0	0	0	0.02	2	0.03	2	0	0	0	0	0	0	0	0	0	4
512	chr4:174264132-176570716	0.01	5	0	0	0	0	0	0	0	0	0	0	0	0	0	0	0	0	0	1	0	0
584	chr5:105893055-107264196	0.06	9	0	0	0	0	0	0	0	1	0	0	0	3	0	0	0	0	0	0	0	0
589	chr5:113396285-114830370	0	0	0	0	0	0	0	0	0	0	0	0	0	0	0	0	0	0	0	0	0	0
599	chr5:127344604-129519025	0.83	15	0	0	0	1	0	0	0	0	0	0	0	0	0	0	0	1	0	2	0	45
603	chr5:136376050-139265072	0.41	1	0	0	0	0	0	0	0	0	0	0	0	0	0	1	0	0	0	0	0.17	9
605	chr5:140645971-142981248	0.21	1	0.01	1	0	2	0	0	0.02	1	0	3	0	0	0	0	0	0	0	0	0	1
621	chr5:166847740-168525318	0	0	0	0	0	0	0	0	0	0	0	0	0	0	0	1	0	0	0	0	0	0
624	chr5:171074292-172678327	0.84	6	0	0	0	0	0	0	0	0	0	0	0	0	0	0	0	0	0	0	0	0
625	chr5:172678327-173642871	0.48	10	0	0	0	0	0	0	0	0	0	0	0	0	0.1	3	0	0	0.18	4	0	0
644	chr6:14802924-17386405	0	0	0	0	0	0	0	0	0.05	1	0	0	0	0	0	0	0	0	0	0	0	0
645	chr6:17386405-19207487	1	1	0	0	0	0	0	0	0	1	0	0	0	0	0	0	0	0	0	0	0	1
660	chr6:35455756-37572596	0	0	0	0	0	0	0	0	0	0	0	0	0	0	1	1	0	0	0	0	0	0
690	chr6:87069500-88822140	0.33	7	0	0	0	0	0	0	0	0	0	0	0.04	2	0.04	2	0	0	0	3	0.12	96
709	chr6:117672972-118963115	0	14	0	0	0	0	0	0	0	0	0	0	0	0	0	0	0	0	0	3	0	0
710	chr6:118963115-119963278	0	0	0	0	0	0	0	0	0	0	0	0	0	0	0	1	0	0	0	0	0	0
713	chr6:121905676-123856181	0	0	0	0	0.01	2	0	0	0	0	0	0	0	0	0	0	0	0	0	0	0	0
728	chr6:148920352-150253404	0	0	0	0	0	0	0	0	0	0	0	0	0	0	0	0	0	0	0	0	0	0
758	chr7:13884202-15143657	0	0	0	0	0	0	0	0	0	0	0	0	0	0	0	0	0	0	0	0	0	0
767	chr7:28360309-31137289	0	1	0	0	0	0	0	0	0	0	0	0	0	0	0	1	0	0	0	0	0	0
791	chr7:73334602-76458564	0.02	214	0	1	0	4	0	0	0	5	0	1	0	14	0.01	56	0	7	0	19	0.01	20
799	chr7:90661784-92493752	0	0	0	0	0	0	0	0	0	0	0	0	0	0	0	0	0	0	0	1	0	0
813	chr7:113712387-116780178	0.95	1	0	0	0	0	0	0	0	0	0	0	0	0	0	0	0	0	0	0	0	0
821	chr7:126869221-128778386	0.04	57	0	0	0	2	0	0	0	1	0	0	0	6	0	12	0.02	14	0	8	0.01	20
836	chr7:149840658-150711505	0.94	7	0	0	0	0	0	0	0	0	0	0	0	1	0	0	0.01	1	0	0	0	0
857	chr8:11278998-13491775	0	4	0	0	0	0	0	0	0	6	0	0	0	3	0	4	0	0	0	2	0	0
861	chr8:17387876-17836399	0.01	6	0	0	0	0	0	0	0	0	0	0	0	0	0	0	0	3	0	0	0.94	44
862	chr8:17836399-19492840	1	1	0	0	0	0	0	0	0	0	0	0	0	0	0	0	0	0	1	1	0	0
865	chr8:21661737-22897057	0	0	0	0	0	0	0	0	0	0	0	0	0	1	0	3	0	0	0	0	0.4	17
922	chr8:121201700-124861459	0.67	1	0	0	0	0	0	0	0	0	0	0	0.07	1	0	0	0	0	0	0	0	0
934	chr8:140725643-143044914	0.1	5	0	2	0.02	2	0	0	0	0	0	1	0	3	0.01	1	0	0	0	0	0.04	31
984	chr9:96671698-98922040	0.98	2	0	0	0	0	0	0	0	0	0	0	0	0	0	0	0	0	0	0	0	2
1009	chr9:138938978-139500342	0.29	3	0	0	0	0	0	0	0	0	0	0	0	0	0	0	0	0	0.01	2	0.07	12
1052	chr10:63341695-65794114	0.22	3	0.01	1	0	0	0	0	0	2	0.01	1	0	0	0.13	4	0	0	0	3	0	0
1054	chr10:67549615-69900148	0.19	7	0	0	0	0	0	0	0	0	0	0	0	0	0.27	6	0.02	2	0.14	1	0.21	27
1058	chr10:73508512-75422550	0.97	4	0	0	0	0	0	0	0	0	0	0	0	0	0	0	0	0	0	0	0	0
1059	chr10:75422550-78706814	0	0	0	0	0	0	0	0	0	0	0	0	0	0	0.09	2	0.04	5	0.01	3	0.17	8
1075	chr10:102949239-104380410	0.58	7	0	0	0	0	0	0	0	0	0	0	0	0	0	1	0.01	1	0	3	0.15	7
1076	chr10:104380410-106695048	0	0	0	0	0	0	0	0	0	0	0	0	0	0	0	0	0	0	0	0	0	0
1080	chr10:112561493-115328432	0.01	19	0	0	0	1	0	0	0	1	0	1	0	7	0	3	0	1	0	3	0	4
1109	chr11:19569535-21017138	0.99	7	0	0	0	0	0	0	0	0	0	0	0	0	0	0	0	0	0	0	0	0
1169	chr11:121175943-122591910	0	0	0	0	0	1	0	0	0.06	2	0	0	0	0	0	2	0	0	0	0	0	0
1175	chr11:128188537-130342575	1	4	0	0	0	0	0	0	0	0	0	0	0	0	0	0	0	0	0	0	0	0
1196	chr12:23820634-25371083	0	0	0	0	0	0	0	0	0	0	0	0	0	0	0	0	0	0	0	0	0	0
1197	chr12:25371083-27799773	0	1	0	0	0	0	0	0	0	1	0	0	0	0	0	1	0	0	0	0	0	0
1201	chr12:32165592-33076989	0.98	2	0	0	0	0	0	0	0	0	0	0	0	0	0	0	0	0	0	0	0	0
1214	chr12:55665837-57548860	0	0	0	0	0	0	0	0	0	1	0	0	0	2	0.01	2	0.01	2	0.07	5	0.03	16
1222	chr12:69826542-70957987	0.03	7	0	0	0	0	0	0	0	0	0	0	0	0	0.02	3	0	1	0	4	0	7
1225	chr12:73818454-76511314	0	2	0	0	0	1	0	0	0	0	0	1	0	1	0	0	0	0	0	0	0	0
1248	chr12:113986709-115036602	0.51	1	0	0	0	0	0	0	0	0	0	0	0	0	0	0	0	0	0.19	1	0	0
1254	chr12:122007651-124977980	0.49	14	0	1	0	0	0	0	0	0	0	2	0.23	4	0.05	2	0.01	2	0.03	9	0.02	51
1261	chr12:132807034-133841511	0.17	19	0	0	0	1	0	0	0	1	0	5	0.22	1	0	8	0	4	0.06	7	0.4	31
1264	chr13:22242174-23594702	0	1	0	0	0	0	0	0	0	0	0	0	0	0	0	0	0	0	0	0	0	0
1323	chr13:113572488-115109853	0.56	7	0	0	0	0	0	0	0	1	0	0	0.16	1	0	0	0.01	2	0	0	0.16	54
1326	chr14:23018665-24905123	0.84	12	0	0	0	0	0	0	0	0	0	0	0	0	0	2	0.11	7	0	0	0.05	8
1331	chr14:32383265-34846251	0	0	0	0	0	0	0	0	0	0	0	0	0	0	0	0	0	0	0	0	0	0
1332	chr14:34846251-35859593	0	0	0	0	0	0	0	0	0	0	0	0	0	0	0	2	0	0	0.37	3	0	0
1352	chr14:63790015-65220298	0.97	1	0	0	0	0	0	0	0	0	0	0	0	0	0	0	0	0	0	0	0	2
1357	chr14:72889615-76444767	0.93	24	0	0	0	1	0	0	0	0	0	0	0	0	0	3	0	2	0	5	0	19
1359	chr14:77229472-78561945	0.98	4	0	0	0	0	0	0	0	0	0	0	0	0	0	0	0	0	0	0	0	0
1404	chr15:56901773-58441366	0	0	0	0	0	0	0	0	0	0	0	0	0	0	0	0	1	2	0	0	0	0
1408	chr15:63215222-65104668	0.01	23	0	0	0	1	0	3	0	2	0	0	0	3	0.01	7	0	3	0	3	0.19	72
1413	chr15:71922649-73628714	0	2	0	0	0	1	0	0	0	0	0.01	1	0	1	0	0	0	2	0	2	0.23	34
1414	chr15:73628714-76398624	0.99	3	0	0	0	0	0	0	0	0	0	0	0	0	0	0	0	0	0	0	0	0
1416	chr15:78516053-80860978	0	0	0	0	0	0	0	0	0	0	0	0	0	0	0	0	0	0	0	0	0	0
1417	chr15:80860978-84260468	0.04	6	0	0	0	0	0	0	0	0	0	1	0	0	0	2	0	0	0	0	0.03	6
1427	chr15:99244059-100636847	0.93	9	0	0	0	0	0	0	0	0	0	0	0	0	0	1	0	0	0	0	0	0
1431	chr16:1207206-2764829	1	1	0	0	0	0	0	0	0	0	0	0	0	0	0	1	1	1	0	0	0	0
1468	chr16:72935150-74971503	0	0	0	0	0	0	0	0	0	0	0	0	0	0	0	0	0	0	0	0	0	0
1485	chr17:1172399-1928731	0.01	8	0	0	0	0	0	0	0	0	0	0	0	0	0.16	6	0	5	0.04	3	0	9
1490	chr17:7317398-8306425	0	0	0	0	0	0	0	0	0.09	1	0	0	0.28	2	0.23	8	0.28	5	0.01	2	0.09	6
1494	chr17:12534769-13180372	0	7	0	0	0	0	0	0	0	0	0	0	0	1	0	0	0	0	0	1	0	0
1506	chr17:36809344-38877404	0.01	17	0	0	0	0	0.21	5	0	0	0	1	0	3	0.1	3	0.08	7	0.08	3	0.28	38
1510	chr17:43056905-45876022	0.11	42	0	0	0	0	0	2	0	0	0	1	0	4	0.04	7	0.01	12	0	22	0.02	308
1527	chr17:76263413-77298636	0.63	4	0.02	6	0	0	0.01	2	0.03	6	0	0	0.11	5	0.04	4	0.01	3	0	7	0.02	8
1557	chr18:45939732-47730584	0.07	1	0	0	0	0	0	0	0	0	0	0	0	0	0.92	1	0	0	0	0	0	0
1558	chr18:47730584-51062185	0.01	4	0.03	1	0	0	0.04	3	0	1	0	0	0	0	0.37	6	0	0	0	1	0	11
1670	chr21:35225465-36524373	0	0	0	0	0	0	0	0	0	0	0	0	0	0	0	0	0	0	0	0	0	0
1682	chr22:18296088-19912358	1	2	0	0	0	0	0	0	0	0	0	0	0	0	0	0	0	0	0	0	0	0
1686	chr22:24984204-26791628	0.1	5	0	0	0	0	0	0	0	0	0	0	0	0	0	1	0.19	1	0	0	0.01	14

## Sheet: Supplementary Data 6
Supplementary Data 6. SNPs chosen for experimental study
We experimentally tested six non-exonic variants that have PIP > 0.95, are located inside CM-OCRs, and overlap with H3K27ac or H3K4me1/3 regions.
ChIP/Motif column: T=TBX5, E=ETV1, G=GATA4, N=NKX2.5, M=MEF2A/C, TE=TEAD1, NR=NR2F2, H=HAND1
SNP	PIP	PIP (uniform prior)	Chromatin Status	Nearest gene	Likely target genes (see Supplementary Data 3 for details)	Cardiac H3K27ac	ChIP	Motif
rs3176326	1	0.999919	CM shared OCR / ENCODE	CDKN1A	CDKN1A, ETV7, PXT1, SRSF3, RAB44, FGD2	yes		E
rs117984853	1	1	Non-CM OCR / ENCODE	TAB2	TAB2	yes
rs4999127	0.989	0.950309	Non-CM OCR/ ENCODE	ADAR	KCNN3, CHRNB2	yes		T
rs7172038	0.989	0.395706	CM specific OCR / ENCODE	HCN4	HCN4, NPTN	yes	T,N	M
rs1152591	0.965	0.40498	CM specific OCR	ESR2	AKAP5, SYNE2, ESR2, PLEKHG3	yes		TE
rs35620480	0.96	0.217264	CM non-DA OCR / ENCODE	GATA4	GATA4, C8orf49	yes	T,G,N	T
Sequences for the enhancer gBlocks.
The gateway cloning sites (attB) are in purple and blue font on each end of the enhancer sequence.
SNP	Allele	Sequence
rs7172038	T (Ref)	GGGGACAAGTTTGTACAAAAAAGCAGGCTAGCAGAGCCCAAAGCCCTTTCATCTCTAGGCCAGCCCCAGCTGCATTGCCCTTGATCTGTCTACTCCACACCAACCCGGATGCTCGACTGTTCCCTGGGGACTCTGCCAGGGCACTGGGTGGGACCTCTTCCCCCTCCCACCTCGGGGAGCCTGGAGGAAGATGTGCTGACAGCTCAGCCAGGTCTGGACTGTGTCTCTGTGTCCTTCTGGGGCTCCAGGACGTCTGGGCCACCTGGACTCAGAGCCAGGCCAGAGAGGGAGGCACTGGGAGGGGGAGGCCCTGAGGTGCCAGCTGAGCAGAGCTGCCAAGAAATAAGTACCACAGACTCCTCTGTTCGAAGTCTGGAATTCACGATATATCAGGGATGA…
rs7172038	A	GGGGACAAGTTTGTACAAAAAAGCAGGCTAGCAGAGCCCAAAGCCCTTTCATCTCTAGGCCAGCCCCAGCTGCATTGCCCTTGATCTGTCTACTCCACACCAACCCGGATGCTCGACTGTTCCCTGGGGACTCTGCCAGGGCACTGGGTGGGACCTCTTCCCCCTCCCACCTCGGGGAGCCTGGAGGAAGATGTGCTGACAGCTCAGCCAGGTCTGGACTGTGTCTCTGTGTCCTTCTGGGGCTCCAGGACGTCTGGGCCACCTGGACTCAGAGCCAGGCCAGAGAGGGAGGCACTGGGAGGGGGAGGCCCTGAGGTGCCAGCTGAGCAGAGCTGCCAAGAAAAAAGTACCACAGACTCCTCTGTTCGAAGTCTGGAATTCACGATATATCAGGGATGA…
rs7172038	G	GGGGACAAGTTTGTACAAAAAAGCAGGCTAGCAGAGCCCAAAGCCCTTTCATCTCTAGGCCAGCCCCAGCTGCATTGCCCTTGATCTGTCTACTCCACACCAACCCGGATGCTCGACTGTTCCCTGGGGACTCTGCCAGGGCACTGGGTGGGACCTCTTCCCCCTCCCACCTCGGGGAGCCTGGAGGAAGATGTGCTGACAGCTCAGCCAGGTCTGGACTGTGTCTCTGTGTCCTTCTGGGGCTCCAGGACGTCTGGGCCACCTGGACTCAGAGCCAGGCCAGAGAGGGAGGCACTGGGAGGGGGAGGCCCTGAGGTGCCAGCTGAGCAGAGCTGCCAAGAAAGAAGTACCACAGACTCCTCTGTTCGAAGTCTGGAATTCACGATATATCAGGGATGA…
rs3176326	G (Ref)	GGGGACAAGTTTGTACAAAAAAGCAGGCTCGCCACTGTGTCCACCACCTGGCTGAGCGCTGAGGTCAGCGCGGGCTGTTTCCTGGCCCTTGGGAATGTGCCAGGACCCGTCCCCTAAGGACTAGCGAGGAGGTGACTCACTGTGACAAGGAGACCCCAGGGAACGGACTGTATGAGGTCAGAACCCCGCCCGGGATGGGGTACAGCGGGACTCCAGAAGCCCTCTCCCCTGCCCCTTCGCGGTCTCCGTCCTCCCATCGGCACAGTGACCTATTTGGCTGGAACAGTTTGTTCCCAAGGAAGCCGGGCACTGGAGGTCCGGGACACCGCGTCGGGTCCCCGCTCCGCGGCGCGCTGTAGGGGTCGGGGAGTCACGGCCCTGCTCTGGGCGGGCTCTAAC…
rs3176326	A	GGGGACAAGTTTGTACAAAAAAGCAGGCTCGCCACTGTGTCCACCACCTGGCTGAGCGCTGAGGTCAGCGCGGGCTGTTTCCTGGCCCTTGGGAATGTGCCAGGACCCGTCCCCTAAGGACTAGCGAGGAGGTGACTCACTGTGACAAGGAGACCCCAGGGAACGGACTGTATGAGGTCAGAACCCCGCCCGGGATGGGGTACAGCGGAACTCCAGAAGCCCTCTCCCCTGCCCCTTCGCGGTCTCCGTCCTCCCATCGGCACAGTGACCTATTTGGCTGGAACAGTTTGTTCCCAAGGAAGCCGGGCACTGGAGGTCCGGGACACCGCGTCGGGTCCCCGCTCCGCGGCGCGCTGTAGGGGTCGGGGAGTCACGGCCCTGCTCTGGGCGGGCTCTAAC…
rs1152591	A (Ref)	GGGGACAAGTTTGTACAAAAAAGCAGGCTGCCATTAACCATCAATGAAACTTTGGCCACCATTTCCTTATCTCCTAGATAAAGTTGTTTAACTTAGATTATCAAACTTCAGCTTTTTTTTCCTAAGAAAAAATAGCTGGAGGTTTGGGAAAATAACAGATTTTaggccccactccagattgtctaaactggaataaccagaaacaggacctgggaacctgatctttttaaagctgccttagaaatactattggcagttatttttggaaactgctAGATAGGCAGACTTCTCATGCTCTTCTAATTGCAGAAGCCTATGAGTTGATTAATTCTAACAACTGGATACTGTGGTTTAGGGCTTGGAAGACCCAGCTTTCTTGTACAAAGTGGTCCCC
rs1152591	C	GGGGACAAGTTTGTACAAAAAAGCAGGCTGCCATTAACCATCAATGAAACTTTGGCCACCATTTCCTTATCTCCTAGATAAAGTTGTTTAACTTAGATTATCAAACTTCAGCTTTTTTTTCCTAAGAAAAAATAGCTGGAGGTTTGGGAAAATAACAGATTTTaggccccactccagattgtctaaactggaataaccagaaacaggacctgggaacctgatctttttaaagctgccttagaaatactattggcagttatttttggaaactgctAGATAGGCAGACTTCTCCTGCTCTTCTAATTGCAGAAGCCTATGAGTTGATTAATTCTAACAACTGGATACTGTGGTTTAGGGCTTGGAAGACCCAGCTTTCTTGTACAAAGTGGTCCCC
rs1152591	G	GGGGACAAGTTTGTACAAAAAAGCAGGCTGCCATTAACCATCAATGAAACTTTGGCCACCATTTCCTTATCTCCTAGATAAAGTTGTTTAACTTAGATTATCAAACTTCAGCTTTTTTTTCCTAAGAAAAAATAGCTGGAGGTTTGGGAAAATAACAGATTTTaggccccactccagattgtctaaactggaataaccagaaacaggacctgggaacctgatctttttaaagctgccttagaaatactattggcagttatttttggaaactgctAGATAGGCAGACTTCTCGTGCTCTTCTAATTGCAGAAGCCTATGAGTTGATTAATTCTAACAACTGGATACTGTGGTTTAGGGCTTGGAAGACCCAGCTTTCTTGTACAAAGTGGTCCCC
rs1152591	T	GGGGACAAGTTTGTACAAAAAAGCAGGCTGCCATTAACCATCAATGAAACTTTGGCCACCATTTCCTTATCTCCTAGATAAAGTTGTTTAACTTAGATTATCAAACTTCAGCTTTTTTTTCCTAAGAAAAAATAGCTGGAGGTTTGGGAAAATAACAGATTTTaggccccactccagattgtctaaactggaataaccagaaacaggacctgggaacctgatctttttaaagctgccttagaaatactattggcagttatttttggaaactgctAGATAGGCAGACTTCTCTTGCTCTTCTAATTGCAGAAGCCTATGAGTTGATTAATTCTAACAACTGGATACTGTGGTTTAGGGCTTGGAAGACCCAGCTTTCTTGTACAAAGTGGTCCCC
rs35620480	A (Ref)	GGGGACAAGTTTGTACAAAAAAGCAGGCTTCAAACTCCTCCTTCTTTTCTGTTAAGTAGCAAGTCTGGTCTTTCCTTCTTTCCGAGCAGAACCCAGGCTTTACAGTTAATATCCTGCCGCCTCTGATTGCAGCTTTAAGAGGTGTAACATTTGATAAGCTCCATTTAGCTTGGCTGAGCTGCATTGTTTAAATTATTCGAAGACAGATTGCTCCCTCCCCCTACCCTGAGGATTTCTGCTCTACTGAGCTTGCCCACAGCAAGTTACCAGGAAACACGGCAGGGAAGTCAGCAGGGCAGTTTGTCACCGTGAGGCTGAAAGTCAGTTCCAGCCGCTGTTCTGCAGCCATCACACCCCATTATTCCCTGCTAATTGCAAGCCTGGTATGCAGGCTAACTC…
rs35620480	C	GGGGACAAGTTTGTACAAAAAAGCAGGCTTCAAACTCCTCCTTCTTTTCTGTTAAGTAGCAAGTCTGGTCTTTCCTTCTTTCCGAGCAGAACCCAGGCTTTACAGTTAATATCCTGCCGCCTCTGATTGCAGCTTTAAGCGGTGTAACATTTGATAAGCTCCATTTAGCTTGGCTGAGCTGCATTGTTTAAATTATTCGAAGACAGATTGCTCCCTCCCCCTACCCTGAGGATTTCTGCTCTACTGAGCTTGCCCACAGCAAGTTACCAGGAAACACGGCAGGGAAGTCAGCAGGGCAGTTTGTCACCGTGAGGCTGAAAGTCAGTTCCAGCCGCTGTTCTGCAGCCATCACACCCCATTATTCCCTGCTAATTGCAAGCCTGGTATGCAGGCTAACTC…
rs117984853	G (Ref)	GGGGACAAGTTTGTACAAAAAAGCAGGCTtctggggttgcttgtgtggtctgaagTTCTTTATACATGTGCCATCACCTGCGGGTTTATCCAATGAGCTATTTGGCCTTTAATGAATTTTATAGATAATGACAGTATTTCTTAAAAGGCAGGATGACAgccgagcgcggtggcttatgcctgtaatcccagcactttgggaggccgaggcgtgcggatcacgaggtccagagattgagacagtcctggctaacacagtgaaaccccgtctctactaaaaatacaaaaaattagctgggtgtggtggcatgcgcctgcagtcccagtcactcagtaggctgaggcaggagaatcacttgaacctggaaggcagaggttgcagtgagccgagatcatgcca…
rs4999127	G (Ref)	GGGGACAAGTTTGTACAAAAAAGCAGGCTgtctatttgtctaaccctgaagttatattacagtattctctgtagccttTCCTTGGTACCTTCTGAGGGTCTAGCACATAATAGGGGCTCACTAAAATACTTGTGGACTGACTAAGGCCTGCATGCTGCTTTTCCTGTCCCTCTACAAAAGTGAGGCTTGCTTCAGTAATTCAGTGAATCATGTTAAAATGATTTCAGCTGTTCTCTTCAGCAGATTAAACCTTTGTCAAGGTGGCTGCCAAATTCCTTGAGCTTGGAGTCAGTTCTCACTATTAATAAGAACTCAGCTTCATGACACTAGCTGTGATCTGTTACAGCACTAGGGTGACAGAAAATAAGCCAAAGTGAAATGACTGCCTCTTCTTCCTTA…

## Sheet: Supplementary Data 7
Supplementary Data 7. Colocalization result of fine-mapped SNPs with eQTLs
We conducted colocalization analysis between fine-mapped SNPs with GTEx eQTL data from the left ventricle (LV).
"Coloc PP4": probabilities that our fine-mapped SNPs and heart eQTLs are colocalized to the same causal signals.
SNP	chr	b37 bp	A1	A2	locus	PIP	eGenes	Coloc PP4
rs4073778	1	116297758	C	A	72	0.719	CASQ2	0
rs577676	1	170587340	T	C	86	0.885	PRRX1	0
rs3737883	1	203034906	A	G	104	0.749	ADORA1	0
rs4951261	1	205717823	C	A	106	0.694	NUCKS1;RAB7L1;PM20D1	0
rs35215597	2	175543782	G	A	238	0.874	WIPF1	1
rs7650482	3	12841804	A	G	286	0.547	MKRN2	0
rs6801957	3	38767315	T	C	305	0.882	SCN10A	0
rs7612445	3	179172979	T	G	387	0.707	GNB4	0.99
rs60902112	3	194800853	T	C	397	0.59	XXYLT1	0
rs34969716	6	18210109	A	G	645	1	TPMT;KDM1B;DEK	1
rs74910854	7	74110705	G	A	791	0.6	GTF2IRD2	0
rs208757	8	17809791	G	A	861	0.926	ASAH1	0
rs7508	8	17913970	G	A	862	1	PCM1;ASAH1	0
rs60632610	10	75415677	T	C	1058	0.971	FUT11	0
rs9664049	10	104000307	C	T	1075	0.578	PITX3	0
rs76097649	11	128764570	A	G	1175	0.509	C11orf45	0
rs58747679	12	26348304	C	T	1197	0.802	SSPN	0
rs1152591	14	64680848	A	G	1352	0.965	SYNE2	0.8
rs12908004	15	80676925	G	A	1416	1	RP11-210M15.2;ARNT2	0
rs7166287	15	99273075	C	T	1427	0.644	IGF1R	0
rs1563304	17	44874453	T	C	1510	0.524	LRRC37A2	0

## Sheet: Supplementary Data 8
Supplementary Data 8. Gene mapping results, summarized at the gene level.
Genes with gene level PIP > 0.1 are listed in the table. "N SNPs (fractional PIP > 0.02)": number of SNPs with fractional PIP > 0.02 for the gene.
"Nielsen gene score": gene scores from the Nielsen et al. paper. "Nielsen gene score (eQTL + gene sets)": modified gene scores by adding eQTL and gene set information. "van Ouwerkerk gene scores": gene scores from the van Ouwerkerk et al. paper.
Gene	Gene PIP (> 0.1)	N SNPs (fractional PIP > 0.02)	Nielsen gene score	Nielsen gene score (eQTL + gene sets)	van Ouwerkerk gene score
SYNPO2L	1.113	3	2	0	23
HCN4	1.095	11	1	0	12
ASAH1	1.061	2	2	1	20
ATXN1	1	5	1	0	10
EFNA5	1	15	NA	NA	NA
ERBB4	1	18	1	0	NA
KCNN2	1	8	2	1	6
RPL3L	1	1	1	0	12
TUBA8	1	2	1	0	9
EPHA3	0.999	8	3	1	NA
THRB	0.999	9	1	0	5
ETV1	0.998	4	NA	NA	14
BEND5	0.997	1	NA	NA	NA
PITX2	0.997	3	2	1	17
TBX5	0.997	5	2	1	23
PKP2	0.992	2	2	1	15
CAMK2D	0.991	5	2	1	14
NKX2-5	0.989	4	2	1	12
GYPC	0.985	10	2	1	NA
LRIG1	0.982	9	1	0	11
ZEB2	0.979	1	NA	NA	NA
NR3C1	0.975	11	1	0	11
MYO18B	0.974	4	3	1	NA
DPF3	0.972	2	1	0	NA
WIPF1	0.971	2	2	1	10
TAB2	0.947	1	NA	NA	11
FGF9	0.943	2	NA	NA	10
AKAP6	0.937	2	1	0	11
PLN	0.935	7	1	1	16
XXYLT1	0.93	2	1	0	2
CALU	0.917	1	1	0	15
IGF1R	0.917	4	2	1	14
CREB5	0.915	5	2	1	5
MEX3C	0.91	6	2	0	NA
DBX1	0.909	6	NA	NA	0
SSPN	0.896	2	3	2	14
CASZ1	0.882	5	2	1	8
CAV1	0.873	2	2	1	23
HAND2	0.872	12	1	1	15
ZFHX3	0.845	1	1	0	11
TTN	0.839	5	2	0	16
KCNN3	0.837	2	2	1	13
CHRNB2	0.83	2	NA	NA	5
ELOVL6	0.819	3	NA	NA	5
CFL2	0.818	3	2	0	12
GJA5	0.802	7	2	1	NA
GNB4	0.781	1	1	0	11
CAND2	0.771	2	2	0	18
METTL11B	0.761	9	NA	NA	5
C9orf3	0.759	1	2	1	7
ISOC1	0.756	6	NA	NA	NA
CEP85L	0.737	1	NA	NA	7
KCND3	0.736	8	1	0	5
PRRX1	0.719	2	NA	NA	14
CLIC6	0.715	1	NA	NA	6
CYTH1	0.693	7	1	0	NA
PHLDA1	0.685	2	2	1	6
HSF2	0.675	4	1	0	10
HERC1	0.668	7	2	0	12
SPATS2L	0.654	5	3	1	12
SLIT3	0.642	7	2	1	NA
CEP68	0.631	4	2	1	20
USP34	0.626	2	2	0	15
SLFNL1	0.625	1	NA	NA	NA
SORL1	0.623	15	1	0	1
ARHGAP10	0.62	4	2	1	14
NPTN	0.619	2	NA	NA	15
AC026310.1	0.61	12	NA	NA	NA
LHX3	0.605	2	1	0	NA
CASQ2	0.583	3	3	2	12
ABHD17C	0.57	9	NA	NA	NA
GATA4	0.57	1	1	0	NA
SCN10A	0.556	2	2	0	9
YWHAE	0.555	4	1	0	NA
NUCKS1	0.554	3	1	0	16
DENND3	0.544	2	NA	NA	6
AC005358.1	0.542	7	NA	NA	2
FRMD4B	0.535	7	2	1	NA
FGF5	0.533	1	1	0	NA
PDCD4	0.516	2	NA	NA	NA
PCID2	0.513	3	NA	NA	NA
FBRSL1	0.504	7	1	0	NA
REEP1	0.504	8	1	0	12
ARNT2	0.502	1	1	0	NA
RP11-210M15.2	0.502	1	NA	NA	NA
C11orf45	0.5	3	NA	NA	12
KCNJ5	0.5	3	1	0	17
PCM1	0.498	2	NA	NA	20
GMCL1	0.495	3	2	1	16
HSPG2	0.495	1	2	1	NA
CELA3B	0.486	1	NA	NA	NA
MSL2	0.477	5	NA	NA	NA
LRRC10	0.462	1	1	0	13
TTC39A	0.448	6	NA	NA	8
CPEB4	0.437	7	NA	NA	8
FAF1	0.426	1	NA	NA	13
FAM133B	0.426	3	NA	NA	NA
ACAA1	0.425	1	NA	NA	10
MYD88	0.425	1	NA	NA	9
PHLDB2	0.408	7	1	0	12
IRF2BPL	0.407	2	2	1	12
CDKN2C	0.406	1	NA	NA	7
JMJD1C	0.397	2	NA	NA	14
SCN5A	0.392	1	1	1	19
GTF2I	0.39	1	1	0	NA
KIF3C	0.388	1	1	0	2
VANGL1	0.388	1	NA	NA	8
FGL1	0.385	1	NA	NA	2
KIAA1199	0.382	5	NA	NA	4
EPS15	0.38	4	NA	NA	15
FBXO32	0.372	3	1	0	15
KIF20A	0.355	1	NA	NA	9
BLID	0.35	7	NA	NA	3
BOD1	0.35	7	NA	NA	8
STAT6	0.35	2	NA	NA	11
CHI3L1	0.349	3	NA	NA	5
SLC26A9	0.348	1	NA	NA	8
KCNH2	0.345	4	1	0	13
FAM91A1	0.338	3	NA	NA	9
GCOM1	0.333	1	NA	NA	NA
MYZAP	0.333	1	NA	NA	NA
POLR2M	0.333	1	NA	NA	NA
UBE2Q1	0.333	1	NA	NA	13
CCT2	0.318	1	NA	NA	15
REEP3	0.318	3	1	0	13
MYOCD	0.313	5	1	0	12
SIRT1	0.313	2	1	0	NA
TYW5	0.312	1	NA	NA	7
SMAD7	0.31	2	1	0	8
PCCB	0.308	4	NA	NA	NA
UBE2D3	0.302	3	NA	NA	19
CALHM2	0.301	2	NA	NA	5
ASXL2	0.299	1	NA	NA	7
SLC35F1	0.298	5	1	0	9
KDM3A	0.297	3	NA	NA	15
ZNF292	0.297	2	NA	NA	15
GORAB	0.286	1	NA	NA	9
KLHL38	0.284	3	NA	NA	9
PKD2L2	0.283	2	NA	NA	6
MYH6	0.28	2	3	1	15
NRBF2	0.28	1	1	1	11
ZPBP2	0.28	2	2	0	NA
PITX3	0.277	1	NA	NA	5
KDM1B	0.273	1	2	1	10
DEK	0.271	1	1	1	15
TPMT	0.271	1	NA	NA	8
SMIM8	0.265	4	NA	NA	NA
CUL4A	0.263	1	2	0	NA
CTPS1	0.259	1	NA	NA	NA
NEURL	0.257	2	NA	NA	2
CDK6	0.255	2	1	0	NA
PRDM8	0.255	1	NA	NA	NA
AKAP5	0.25	1	NA	NA	7
ESR2	0.25	1	1	1	9
PLEKHG3	0.25	1	NA	NA	9
SYNE2	0.25	1	3	2	23
NAP1L1	0.246	1	NA	NA	10
VPS37B	0.246	5	NA	NA	4
AGO2	0.244	2	NA	NA	NA
RCAN1	0.242	1	NA	NA	4
SLC9B1	0.241	2	2	0	5
PRMT10	0.238	3	NA	NA	7
BCAT1	0.237	7	NA	NA	2
PANK3	0.233	5	NA	NA	NA
HIP1R	0.231	5	2	0	2
C18orf32	0.23	1	NA	NA	13
RPL17	0.23	1	NA	NA	NA
RPL17-C18orf32	0.23	1	NA	NA	NA
WNT3	0.227	1	1	0	NA
KIFAP3	0.225	1	NA	NA	18
MYOG	0.223	1	NA	NA	6
CISD2	0.214	1	NA	NA	2
TMEM40	0.214	1	NA	NA	5
WNT9B	0.214	1	NA	NA	5
PPFIA4	0.213	1	2	1	9
ABHD10	0.212	3	NA	NA	12
DNAJC12	0.212	1	NA	NA	NA
HERC4	0.212	2	NA	NA	NA
MYBPH	0.204	1	NA	NA	5
LMOD3	0.201	2	NA	NA	NA
BBIP1	0.2	2	NA	NA	NA
SHOC2	0.199	2	NA	NA	NA
SLC1A4	0.199	4	NA	NA	6
AC022400.2	0.198	3	NA	NA	NA
NFKB2	0.196	2	NA	NA	6
XPO7	0.196	2	1	0	14
GBF1	0.195	1	NA	NA	12
CALHM3	0.192	2	NA	NA	5
NEO1	0.192	1	NA	NA	7
MUC8	0.189	3	NA	NA	NA
SNRNP27	0.184	2	NA	NA	19
IKZF3	0.182	1	NA	NA	NA
PTK2	0.181	2	2	0	14
FBN2	0.179	2	NA	NA	NA
ELOVL3	0.178	1	NA	NA	5
NACA	0.178	3	2	0	15
C5orf47	0.177	2	NA	NA	0
RP1-102H19.8	0.176	2	NA	NA	NA
DOK2	0.175	2	NA	NA	2
NCF1	0.175	1	NA	NA	2
TNFSF12-TNFSF13	0.173	1	1	0	5
TNFSF12	0.172	1	1	0	3
ENPEP	0.171	3	NA	NA	6
MYPN	0.169	2	1	1	NA
C1orf185	0.168	2	NA	NA	2
AGAP5	0.167	2	1	0	6
CDKN1A	0.167	1	2	1	8
ETV7	0.167	1	NA	NA	5
FGD2	0.167	1	NA	NA	6
PXT1	0.167	1	NA	NA	5
RAB44	0.167	1	NA	NA	NA
SRSF3	0.167	1	NA	NA	15
PKIB	0.159	3	NA	NA	2
SERINC1	0.159	3	NA	NA	11
MANBA	0.158	1	NA	NA	12
AC013449.1	0.155	1	NA	NA	NA
C16orf47	0.155	1	NA	NA	NA
KANSL1	0.155	1	NA	NA	12
XPO1	0.153	0	NA	NA	14
DMTN	0.152	4	NA	NA	NA
P2RX2	0.15	1	NA	NA	NA
RAB1A	0.147	4	NA	NA	15
ABCB9	0.146	3	NA	NA	0
CRK	0.146	1	1	1	NA
TAGLN3	0.145	1	NA	NA	5
MYH7	0.144	1	1	1	15
QSOX2	0.144	1	NA	NA	NA
ARHGAP44	0.143	4	NA	NA	6
FGF17	0.142	2	NA	NA	5
NHLRC1	0.142	1	NA	NA	5
MYOT	0.141	1	1	1	15
DLEC1	0.14	1	NA	NA	5
RAB10	0.139	1	NA	NA	11
FBP1	0.135	1	NA	NA	5
C4orf22	0.134	1	NA	NA	NA
STAG1	0.134	2	NA	NA	NA
NPM2	0.131	2	NA	NA	5
FAM212B	0.13	2	NA	NA	NA
ZSWIM8	0.13	2	NA	NA	NA
POM121C	0.129	1	NA	NA	NA
DDX20	0.128	2	NA	NA	6
ARL6IP4	0.127	3	NA	NA	6
CALHM1	0.127	1	NA	NA	5
PEX1	0.124	1	NA	NA	NA
RBM48	0.124	1	NA	NA	NA
SNX6	0.124	1	NA	NA	11
TRIM73	0.122	2	NA	NA	2
CGA	0.115	0	1	0	5
SNX1	0.113	2	NA	NA	13
MET	0.109	1	NA	NA	7
AHSA2	0.108	1	NA	NA	13
FBXL22	0.108	0	NA	NA	8
PLCXD2	0.108	1	1	0	5
BEST3	0.107	1	NA	NA	5
C2orf42	0.107	1	NA	NA	7
ANGEL1	0.106	2	NA	NA	7
C14orf166B	0.106	2	NA	NA	2
FAM13B	0.106	1	1	1	21
C8orf49	0.105	1	NA	NA	NA
OSBPL9	0.105	1	NA	NA	14
USP36	0.104	2	1	0	NA
GJA8	0.103	2	NA	NA	5
TNFSF13	0.103	1	NA	NA	5
PROZ	0.101	2	NA	NA	NA

## Sheet: Supplementary Data 9
Supplementary Data 9. Gene mapping results, summarized at the level of LD blocks.
This table shows the gene mapping results for each locus (LD block). "80% Credible Gene Set" shows the set of genes that capture the causal signal at a locus with at least 80% probability.
"Top Genes": genes with highest gene PIP at each locus. "Top Genes PIP": gene PIP of the top gene. "Top Genes PIP (locus level)": locus level gene PIP for the top gene. Locus level gene PIP only includes SNPs within a locus, so this value may be lower than the gene PIP.
Locus	Location	80% Credible Gene Set	Top Genes	Top Gene PIP (locus level)	Top Gene PIP	Nearest Gene	Matched Nielsen Locus	Nominated genes (Nielsen)
7	chr1:9365199-10806984	CASZ1	CASZ1	0.882	0.882	CASZ1	1	CASZ1
15	chr1:21736588-23086883	HSPG2,CELA3B	HSPG2	0.495	0.495	HSPG2	2	HSPG2
25	chr1:40200567-41975327	SLFNL1,CTPS1	SLFNL1	0.625	0.625	SLFNL1	3	SCMH1
31	chr1:48978188-49894177	BEND5	BEND5	0.997	0.997	BEND5	4	AGBL4
32	chr1:49894177-51713726	FAF1,CDKN2C	FAF1	0.41	0.426	C1orf185	4,5	AGBL4,MIR6500
33	chr1:51713726-54226262	TTC39A,EPS15	TTC39A	0.447	0.448	EPS15	5	MIR6500
69	chr1:111741737-113273306	KCND3,FAM212B	KCND3	0.736	0.736	KCND3	6	KCND3
72	chr1:115880593-118839067	CASQ2,VANGL1	CASQ2	0.583	0.583	CASQ2	7	CASQ2
74	chr1:144977494-148361253	GJA5	GJA5	0.802	0.802	GJA5	8	GJA5
77	chr1:153180829-154770403	KCNN3,CHRNB2	KCNN3	0.503	0.837	ADAR	9	KCNN3
78	chr1:154770403-156336133	UBE2Q1,CHRNB2,KCNN3	UBE2Q1	0.333	0.333	KCNN3	9	KCNN3
85	chr1:169086324-170557776	METTL11B,KIFAP3	METTL11B	0.76	0.761	METTL11B	10	LINC01142
86	chr1:170557776-173097907	PRRX1,GORAB	PRRX1	0.718	0.719	PRRX1	10	LINC01142
104	chr1:201589975-203334734	CHI3L1,MYOG,PPFIA4,MYBPH	CHI3L1	0.349	0.349	MYOG	11	PPFIA4
106	chr1:204681068-206073265	NUCKS1,SLC26A9	NUCKS1	0.554	0.554	AC119673.1	12	NUCKS1,SLC41A1
148	chr2:24686918-26894985	KIF3C,ASXL2,AC013449.1	KIF3C	0.388	0.388	KIF3C	13	KIF3C
173	chr2:60292000-62429044	USP34,XPO1,AHSA2	USP34	0.626	0.626	AHSA2	14	USP34
175	chr2:64625913-65933444	CEP68,SLC1A4	CEP68	0.631	0.631	CEP68	15	CEP68
179	chr2:69139564-70755198	GMCL1,SNRNP27,C2orf42,MXD1	GMCL1	0.495	0.495	SNRNP27	16	GMCL1,ANXA4
187	chr2:85140680-88038507	REEP1,KDM3A	REEP1	0.504	0.504	REEP1	17	REEP1
207	chr2:127373764-128034347	GYPC	GYPC	0.985	0.985	GYPC	18	GYPC
219	chr2:144519484-146445570	ZEB2	ZEB2	0.979	0.979	ZEB2	19	TEX41
238	chr2:173138905-175588929	WIPF1	WIPF1	0.971	0.971	WIPF1	20	WIPF1
241	chr2:178553183-181312739	TTN	TTN	0.839	0.839	PLEKHA3	21	TTN,MIR548N,FKBP7,TTN-AS1
251	chr2:199311125-201576284	SPATS2L,TYW5	SPATS2L	0.654	0.654	SPATS2L	22	SPATS2L
258	chr2:212379518-214014282	ERBB4	ERBB4	1	1	ERBB4	23	ERBB4
286	chr3:11019665-13070799	CAND2,TMEM40	CAND2	0.771	0.771	CAND2	24	CAND2
295	chr3:23804865-25461558	THRB	THRB	0.999	0.999	THRB	25	THRB
304	chr3:36486842-38356116	ACAA1,MYD88	ACAA1	0.425	0.425	DLEC1	26	SCN10A,SCN5A
305	chr3:38356116-40221298	SCN10A,SCN5A	SCN10A	0.556	0.556	SCN10A	26	SCN10A,SCN5A
322	chr3:66270447-68286914	LRIG1	LRIG1	0.982	0.982	LRIG1	27	LRIG1,SLC25A26
324	chr3:69276762-70449028	FRMD4B,LMOD3,ARL6IP5	FRMD4B	0.535	0.535	FRMD4B	28	FRMD4B
336	chr3:88298373-94255316	EPHA3	EPHA3	0.999	0.999	EPHA3	29	EPHA3
346	chr3:110513770-112815699	PHLDB2,ABHD10,TAGLN3,PLCXD2	PHLDB2	0.408	0.408	PHLDB2	30	PHLDB2,PLCXD2
361	chr3:135456906-137371083	MSL2,PCCB,STAG1	MSL2	0.477	0.477	MSL2	31	PPP2R3A
387	chr3:178107165-179374586	GNB4,ZNF639	GNB4	0.781	0.781	GNB4	32	GNB4
397	chr3:194786674-195971408	XXYLT1	XXYLT1	0.93	0.93	XXYLT1	33	XXYLT1
453	chr4:80990297-82125315	FGF5,PRDM8,C4orf22	FGF5	0.533	0.533	FGF5	34	FGF5
467	chr4:103221356-105305294	UBE2D3,SLC9B1,CISD2,MANBA	UBE2D3	0.302	0.302	SLC9B1	35	SLC9B1
470	chr4:108815348-111256567	ELOVL6	ELOVL6	0.818	0.819	ELOVL6	36	PITX2
471	chr4:111256567-113870102	PITX2	PITX2	0.996	0.997	PITX2	36,37	PITX2,CAMK2D
472	chr4:113870102-115666246	CAMK2D	CAMK2D	0.991	0.991	CAMK2D	37	CAMK2D
495	chr4:148521873-150683580	ARHGAP10,PRMT10	ARHGAP10	0.62	0.62	ARHGAP10	38	ARHGAP10
512	chr4:174264132-176570716	HAND2	HAND2	0.872	0.872	HAND2	39	HAND2,HAND2-AS1
584	chr5:105893055-107264196	EFNA5	EFNA5	1	1	EFNA5	40	LOC102467213
589	chr5:113396285-114830370	KCNN2	KCNN2	1	1	KCNN2	41	KCNN2
599	chr5:127344604-129519025	ISOC1,FBN2	ISOC1	0.756	0.756	ISOC1	42	SLC27A6
603	chr5:136376050-139265072	KIF20A,PKD2L2,MYOT,FAM13B	KIF20A	0.355	0.355	FAM13B	43	WNT8A,NPY6R,MYOT,FAM13B
605	chr5:140645971-142981248	NR3C1	NR3C1	0.975	0.975	NR3C1	44	NR3C1
621	chr5:166847740-168525318	SLIT3,PANK3	SLIT3	0.642	0.642	SLIT3	45	SLIT3
624	chr5:171074292-172678327	NKX2-5	NKX2-5	0.989	0.989	NKX2-5	46	NKX2-5
625	chr5:172678327-173642871	CPEB4,BOD1,C5orf47	CPEB4	0.437	0.437	C5orf47	46	NKX2-5
644	chr6:14802924-17386405	ATXN1	ATXN1	1	1	GMPR	47,48	ATXN1,KDM1B,DEK
645	chr6:17386405-19207487	KDM1B,TPMT,DEK	KDM1B	0.273	0.273	KDM1B	47,48	ATXN1,KDM1B,DEK
660	chr6:35455756-37572596	CDKN1A,ETV7,PXT1,SRSF3,RAB44	CDKN1A	0.167	0.167	CDKN1A	49	CDKN1A,PANDAR,PI16
690	chr6:87069500-88822140	ZNF292,SMIM8,RP1-102H19.8,CGA	ZNF292	0.297	0.297	CGA	50	CGA
709	chr6:117672972-118963115	PLN,SLC35F1	PLN	0.669	0.935	PLN	51	SLC35F1,PLN
710	chr6:118963115-119963278	CEP85L,PLN	CEP85L	0.709	0.737	CEP85L	51	SLC35F1,PLN
713	chr6:121905676-123856181	HSF2,SERINC1	HSF2	0.675	0.675	HSF2	52	HSF2
728	chr6:148920352-150253404	TAB2	TAB2	0.947	0.947	TAB2	53	UST
758	chr7:13884202-15143657	ETV1	ETV1	0.998	0.998	ETV1	54	DGKB
767	chr7:28360309-31137289	CREB5	CREB5	0.915	0.915	CREB5	55	CREB5
791	chr7:73334602-76458564	GTF2I,NCF1,POM121C,TRIM73	GTF2I	0.39	0.39	GTF2I	56	GTF2I,LOC101926943,GTF2IRD2
799	chr7:90661784-92493752	FAM133B,CDK6,RBM48	FAM133B	0.426	0.426	FAM133B	57	CDK6
813	chr7:113712387-116780178	CAV1	CAV1	0.873	0.873	CAV1	58	CAV1,CAV2
821	chr7:126869221-128778386	CALU	CALU	0.917	0.917	OPN1SW	59	OPN1SW,CALU
836	chr7:149840658-150711505	KCNH2,NOS3,ABCB8,ATG9B,SLC4A2,CDK5,ASIC3,FASTK,TMUB1,AGAP3,TMEM176B,TMEM176A,AOC1,GIMAP5,GIMAP1,ASB10,GIMAP2,ABCF2	KCNH2	0.345	0.345	KCNH2	60	KCNH2
857	chr8:11278998-13491775	GATA4,C8orf49,NEIL2,BLK	GATA4	0.57	0.57	GATA4	61	GATA4
861	chr8:17387876-17836399	PCM1,FGL1	PCM1	0.498	0.498	PCM1	62	ASAH1
862	chr8:17836399-19492840	ASAH1	ASAH1	1	1.061	ASAH1	62	ASAH1
865	chr8:21661737-22897057	XPO7,DOK2,DMTN,FGF17,NPM2,REEP4	XPO7	0.196	0.196	XPO7	63	XPO7
922	chr8:121201700-124861459	FBXO32,FAM91A1,KLHL38	FBXO32	0.372	0.372	FBXO32	64	FBXO32
934	chr8:140725643-143044914	DENND3,AGO2,PTK2	DENND3	0.544	0.544	AGO2	65	PTK2
984	chr9:96671698-98922040	C9orf3,FBP1	C9orf3	0.759	0.759	C9orf3	66	C9orf3
1009	chr9:138938978-139500342	LHX3,QSOX2,GPSM1	LHX3	0.605	0.605	LHX3	67	LHX3
1052	chr10:63341695-65794114	JMJD1C,REEP3,NRBF2	JMJD1C	0.397	0.397	REEP3	68	REEP3,NRBF2
1054	chr10:67549615-69900148	SIRT1,HERC4,DNAJC12,MYPN	SIRT1	0.313	0.313	SIRT1	69	SIRT1,MYPN
1058	chr10:73508512-75422550	SYNPO2L	SYNPO2L	0.98	1.113	SYNPO2L	70	SYNPO2L,NUDT13,MYOZ1,AGAP5
1059	chr10:75422550-78706814	AC022400.2,AGAP5,SYNPO2L,ZSWIM8,SEC24C,FUT11,MYOZ1	AC022400.2	0.197	0.198	AGAP5	70,71	SYNPO2L,NUDT13,MYOZ1,AGAP5,C10orf11
1075	chr10:102949239-104380410	PITX3,NFKB2,GBF1,ELOVL3	PITX3	0.277	0.277	NFKB2	72	NEURL1
1076	chr10:104380410-106695048	CALHM2,NEURL,CALHM3,CALHM1	CALHM2	0.301	0.301	NEURL	72	NEURL1
1080	chr10:112561493-115328432	PDCD4,BBIP1,SHOC2	PDCD4	0.516	0.516	PDCD4	73	RBM20
1109	chr11:19569535-21017138	DBX1	DBX1	0.909	0.909	DBX1	74	NAV2
1169	chr11:121175943-122591910	SORL1,BLID	SORL1	0.623	0.623	SORL1	75	SORL1
1175	chr11:128188537-130342575	C11orf45,KCNJ5	C11orf45	0.5	0.5	KCNJ5	76	KCNJ5
1196	chr12:23820634-25371083	AC026310.1,BCAT1	AC026310.1	0.61	0.61	AC026310.1	77,78	LINC00477,SSPN
1197	chr12:25371083-27799773	SSPN	SSPN	0.896	0.896	BHLHE41	77,78	LINC00477,SSPN
1201	chr12:32165592-33076989	PKP2	PKP2	0.992	0.992	YARS2	79	PKP2
1214	chr12:55665837-57548860	STAT6,NACA,PTGES3,LRP1,PRIM1,HSD17B6	STAT6	0.35	0.35	NACA	80	NACA
1222	chr12:69826542-70957987	LRRC10,CCT2,BEST3	LRRC10	0.462	0.462	LRRC10	81	LRRC10
1225	chr12:73818454-76511314	PHLDA1,NAP1L1	PHLDA1	0.685	0.685	PHLDA1	82	PHLDA1
1248	chr12:113986709-115036602	TBX5	TBX5	0.997	0.997	TBX5	83	TBX5
1254	chr12:122007651-124977980	VPS37B,HIP1R,ABCB9,ARL6IP4,NCOR2,CCDC62	VPS37B	0.246	0.246	HIP1R	84	HIP1R
1261	chr12:132807034-133841511	FBRSL1,MUC8,P2RX2	FBRSL1	0.504	0.504	P2RX2	85	FBRSL1
1264	chr13:22242174-23594702	FGF9	FGF9	0.943	0.943	SGCG	86	LINC00540,LINC00621,SGCG
1323	chr13:113572488-115109853	PCID2,CUL4A,PROZ	PCID2	0.513	0.513	PCID2	87	CUL4A
1326	chr14:23018665-24905123	MYH6,MYH7,CMTM5,IL25,NGDN,EFS,SLC22A17	MYH6	0.28	0.28	MYH6	88	MYH6,MYH7
1331	chr14:32383265-34846251	AKAP6	AKAP6	0.937	0.937	AKAP6	89,90	AKAP6,CFL2
1332	chr14:34846251-35859593	CFL2	CFL2	0.818	0.818	CFL2	90	CFL2
1352	chr14:63790015-65220298	AKAP5,ESR2,SYNE2,PLEKHG3	AKAP5	0.25	0.25	ESR2	91	SYNE2,MIR548AZ,ESR2,MTHFD1
1357	chr14:72889615-76444767	DPF3	DPF3	0.972	0.972	DPF3	92,93	DPF3,IRF2BPL
1359	chr14:77229472-78561945	IRF2BPL,ANGEL1,C14orf166B,KIAA1737,RP11-463C8.4	IRF2BPL	0.407	0.407	IRF2BPL	93	IRF2BPL
1404	chr15:56901773-58441366	POLR2M,MYZAP,GCOM1	POLR2M	0.333	0.333	POLR2M	94	GCOM1/MYZAP
1408	chr15:63215222-65104668	HERC1,SNX1,FBXL22	HERC1	0.668	0.668	HERC1	95	HERC1
1413	chr15:71922649-73628714	HCN4,NEO1,NPTN	HCN4	0.593	1.095	NEO1	96	HCN4
1414	chr15:73628714-76398624	HCN4,NPTN	HCN4	0.502	1.095	HCN4	96	HCN4
1416	chr15:78516053-80860978	RP11-210M15.2,ARNT2	RP11-210M15.2	0.5	0.502	RP11-210M15.2	97	ARNT2
1417	chr15:80860978-84260468	ABHD17C,KIAA1199	ABHD17C	0.57	0.57	ABHD17C	97	ARNT2
1427	chr15:99244059-100636847	IGF1R	IGF1R	0.917	0.917	IGF1R	98	IGF1R
1431	chr16:1207206-2764829	RPL3L	RPL3L	1	1	RPL3L	99	RPL3L
1468	chr16:72935150-74971503	ZFHX3	ZFHX3	0.845	0.845	ZFHX3	100	ZFHX3
1485	chr17:1172399-1928731	YWHAE,CRK,MYO1C,TUSC5	YWHAE	0.555	0.555	YWHAE	101	YWHAE,CRK,MYO1C
1490	chr17:7317398-8306425	TNFSF12-TNFSF13,TNFSF12,TNFSF13,YBX2,SPEM1,PLSCR3,KCTD11,TMEM256,NEURL4,DVL2,SENP3,EIF4A1	TNFSF12-TNFSF13	0.173	0.173	TNFSF12-TNFSF13	102	TNFSF12,TNFSF12-TNFSF13,SOX15,FXR2
1494	chr17:12534769-13180372	AC005358.1,MYOCD	AC005358.1	0.542	0.542	AC005358.1	103	MYOCD
1506	chr17:36809344-38877404	ZPBP2,IKZF3,GSDMB,GRB7,TCAP,ORMDL3,LRRC3C,PNMT	ZPBP2	0.28	0.28	ZPBP2	104	ZPBP2,GSDMB,ORMDL3
1510	chr17:43056905-45876022	WNT3,WNT9B,KANSL1,STH,SPPL2C,GOSR2	WNT3	0.227	0.227	WNT3	105	WNT3
1527	chr17:76263413-77298636	CYTH1,USP36,TMC6	CYTH1	0.693	0.693	CYTH1	106	CYTH1,USP36
1557	chr18:45939732-47730584	SMAD7,C18orf32,RPL17-C18orf32,RPL17	SMAD7	0.31	0.31	SMAD7	107108	SMAD7,MEX3C
1558	chr18:47730584-51062185	MEX3C	MEX3C	0.91	0.91	MEX3C	108	MEX3C
1670	chr21:35225465-36524373	CLIC6,RCAN1	CLIC6	0.715	0.715	CLIC6	109	LINC01426
1682	chr22:18296088-19912358	TUBA8	TUBA8	1	1	TUBA8	110	TUBA8
1686	chr22:24984204-26791628	MYO18B	MYO18B	0.974	0.974	MYO18B	111	MYO18B

[truncated: 6 more sheets: Supplementary Data 10, Supplementary Data 11, Supplementary Data 12, Supplementary Data 13, Supplementary Table 14, Supplementary Table 15]
